# Supplementary material for: Development and Evaluation of a Virtual Population of Children with Obesity for Physiologically Based Pharmacokinetic Modeling
Source: PubMed Central journal article supplement — Clin Pharmacokinet. 2021 Oct 7;61(2):307–20. doi: 10.1007/s40262-021-01072-4 (PMC8813791; doi:10.1007/s40262-021-01072-4), 2021-10-07
Supplement: 40262_2021_1072_MOESM1_ESM.pdf [file 40262_2021_1072_MOESM1_ESM.pdf]

# ELECTRONIC SUPPLEMENTARY MATERIAL

## *Clinical Pharmacokinetics*

### **Development and Evaluation of a Virtual Population of Children with Obesity for Physiologically-Based Pharmacokinetic Modeling**

Jacqueline G. Gerhart<sup>1</sup>, Fernando O. Carreño<sup>1</sup>, Andrea N. Edginton<sup>2</sup>, Jaydeep Sinha<sup>1</sup>, Eliana M. Perrin<sup>3</sup>, Karan R. Kumar<sup>4,5</sup>, Aruna Rikhi<sup>4</sup>, Christoph P. Hornik<sup>4,5</sup>, Vincent Harris<sup>1</sup>, Samit Ganguly<sup>1,6</sup>, Michael Cohen-Wolkowicz<sup>4,5</sup>, and Daniel Gonzalez<sup>1,\*</sup>; on behalf of the Best Pharmaceuticals for Children Act – Pediatric Trials Network Steering Committee

<sup>1</sup>Division of Pharmacotherapy and Experimental Therapeutics, UNC Eshelman School of Pharmacy, The University of North Carolina at Chapel Hill, Chapel Hill, NC, USA; <sup>2</sup>School of Pharmacy, University of Waterloo, Waterloo, ON, Canada; <sup>3</sup>Department of Pediatrics, School of Medicine and School of Nursing, Johns Hopkins University, Baltimore, MD, USA; <sup>4</sup>Duke Clinical Research Institute, Durham, NC, USA; <sup>5</sup>Department of Pediatrics, Duke University School of Medicine, Durham, NC, USA; <sup>6</sup>Regeneron Pharmaceuticals, Inc., Tarrytown, NY, USA.

**Address correspondence to:** Daniel Gonzalez, UNC Eshelman School of Pharmacy, The University of North Carolina at Chapel Hill, 301 Pharmacy Lane, Campus Box #7569, Chapel Hill, NC 27599-7569, USA. Tel: +1-919-966-9984; Fax: +1-919-962-0644; E-mail: daniel.gonzalez@unc.edu

## TABLE OF CONTENTS

|          |                                                                                              |    |
|----------|----------------------------------------------------------------------------------------------|----|
| <b>1</b> | <b>SUPPLEMENTARY METHODS</b> .....                                                           | 4  |
| 1.1      | <b>Comprehensive Literature Search</b> .....                                                 | 4  |
| 1.2      | <b>Virtual Population Data Analysis</b> .....                                                | 4  |
| 1.3      | <b>Growth Curve Development and Validation</b> .....                                         | 5  |
| 1.4      | <b>Calculations for Glomerular Filtration Rate (GFR)</b> .....                               | 6  |
| 1.5      | <b>Clinical Data for Clindamycin PBPK Modeling – External Data Study</b> .....               | 8  |
| 1.6      | <b>Clindamycin Oral Absorption Model Development and Evaluation</b> .....                    | 9  |
| <b>2</b> | <b>SUPPLEMENTARY RESULTS</b> .....                                                           | 9  |
| 2.1      | <b>Virtual Population Demographics</b> .....                                                 | 9  |
| 2.2      | <b>Clindamycin Oral Absorption Model</b> .....                                               | 10 |
| 2.3      | <b>Incorporating AAG Concentration into <math>F_u</math> for Clindamycin</b> .....           | 10 |
| <b>3</b> | <b>SUPPLEMENTARY FIGURES</b> .....                                                           | 12 |
|          | <b>Supplementary Figure 1. Updated growth curves</b> .....                                   | 13 |
|          | <b>Supplementary Figure 2. Updated growth curves, validation</b> .....                       | 15 |
|          | <b>Supplementary Figure 3. Hematocrit versus age</b> .....                                   | 16 |
|          | <b>Supplementary Figure 4. Albumin versus age</b> .....                                      | 17 |
|          | <b>Supplementary Figure 5. AAG versus age</b> .....                                          | 18 |
|          | <b>Supplementary Figure 6. Kidney and liver volume increases</b> .....                       | 19 |
|          | <b>Supplementary Figure 7. Cardiac output versus age</b> .....                               | 20 |
|          | <b>Supplementary Figure 8. CLIN obese population simulations, AAG-adjusted</b> .....         | 29 |
|          | <b>Supplementary Figure 9. TMP nonobese population simulations</b> .....                     | 31 |
|          | <b>Supplementary Figure 10. SMX nonobese population simulations</b> .....                    | 33 |
|          | <b>Supplementary Figure 11. TMP obese population simulations</b> .....                       | 38 |
|          | <b>Supplementary Figure 12. TMP/SMX obese AFE</b> .....                                      | 40 |
|          | <b>Supplementary Figure 13. SMX obese population simulations</b> .....                       | 45 |
|          | <b>Supplementary Figure 14. Weight-normalized PK parameter simulations, 6-12 years</b> ..... | 47 |
|          | <b>Supplementary Figure 15. Weight-normalized PK parameter simulations, 2-6 years</b> .....  | 49 |
|          | <b>Supplementary Figure 16. Absolute PK parameter simulations, 12-18 years</b> .....         | 51 |
|          | <b>Supplementary Figure 17. Absolute PK parameter simulations, 6-12 years</b> .....          | 53 |
|          | <b>Supplementary Figure 18. Absolute PK parameter simulations, 2-6 years</b> .....           | 55 |
|          | <b>Supplementary Figure 19. CLIN dosing simulations, nonobese versus obese</b> .....         | 56 |

|          |                                                                                             |     |
|----------|---------------------------------------------------------------------------------------------|-----|
|          | <b>Supplementary Figure 20.</b> TMP/SMX dosing simulations, nonobese versus obese.....      | 57  |
|          | <b>Supplementary Figure 21.</b> SMX obese population simulations, increased NAT2 clearance. | 62  |
|          | <b>Supplementary Figure 22.</b> Height versus age.....                                      | 63  |
|          | <b>Supplementary Figure 23.</b> Weight versus age.....                                      | 64  |
|          | <b>Supplementary Figure 24.</b> CLIN adult PO population simulations. ....                  | 66  |
|          | <b>Supplementary Figure 25.</b> CLIN obese AFE. ....                                        | 67  |
|          | <b>Supplementary Figure 26.</b> CLIN nonobese population simulations, AAG-adjusted. ....    | 70  |
|          | <b>Supplementary Figure 27.</b> CLIN obese AFE, AAG-adjusted. ....                          | 72  |
| <b>4</b> | <b>SUPPLEMENTARY TABLES</b> .....                                                           | 73  |
|          | <b>Supplementary Table 1.</b> Summary of clinical studies. ....                             | 73  |
|          | <b>Supplementary Table 2.</b> CLIN nonobese subject demographics.....                       | 74  |
|          | <b>Supplementary Table 3.</b> CLIN obese subject demographics.....                          | 76  |
|          | <b>Supplementary Table 4.</b> TMP/SMX nonobese subject demographics.....                    | 78  |
|          | <b>Supplementary Table 5.</b> TMP/SMX obese subject demographics.....                       | 79  |
|          | <b>Supplementary Table 6.</b> CLIN PBPK model parameters.....                               | 81  |
|          | <b>Supplementary Table 7.</b> TMP/SMX PBPK model parameters.....                            | 83  |
|          | <b>Supplementary Table 8.</b> Virtual population demographics for dosing simulations.....   | 85  |
|          | <b>Supplementary Table 9.</b> Hematocrit literature data.....                               | 86  |
|          | <b>Supplementary Table 10.</b> Albumin literature data.....                                 | 87  |
|          | <b>Supplementary Table 11.</b> AAG literature data.....                                     | 89  |
|          | <b>Supplementary Table 12.</b> Organ volume scaling factors.....                            | 90  |
|          | <b>Supplementary Table 13.</b> Kidney and liver volume increases in the literature.....     | 91  |
|          | <b>Supplementary Table 14.</b> Cardiac output literature data.....                          | 94  |
|          | <b>Supplementary Table 15.</b> Literature search terms.....                                 | 96  |
|          | <b>Supplementary Table 16.</b> CLIN adult PO subject demographics and AFE.....              | 99  |
| <b>5</b> | <b>REFERENCES</b> .....                                                                     | 101 |

## **1 SUPPLEMENTARY METHODS**

### **1.1 Comprehensive Literature Search**

In order to leverage existing physiological data from children with obesity into our virtual population, a comprehensive literature search was conducted in PubMed. A detailed search plan was developed in collaboration with medical librarians at the University of North Carolina – Chapel Hill’s Health Science Library that included each of 121 physiological terms relevant to PK modeling combined with keywords 'obese' and 'pediatric', as well as related MeSH (Medical Subject Headings) terms (**Supplementary Table 15**). Articles from all dates were included, and the Human Species filter was used to limit the results. The titles and abstracts from 26,369 resulting search hits were screened for relevance to the virtual population development work using Covidence (Veritas Health Innovation Ltd, Melbourne, Australia) systematic reviews production tool for title/abstract screening, full-text screening, data abstraction, and quality assessment. Each article’s title and abstract was reviewed by two independent screeners, with two rejections required to exclude the article. The full-text of articles approved by one or both screeners was reviewed, and any relevant physiological data extracted to inform the virtual population development. Extracted data for several key physiological parameters relevant to pharmacokinetics are summarized in the **Supplementary Tables 9-11, 13-14** below.

### **1.2 Virtual Population Data Analysis**

In combining data across multiple sources and studies, all units were converted to a single standard unit. When a range was reported for any particular parameter, the midpoint and standard deviation were used. For electronic health record data, recorded height and weight values significantly far above the 3<sup>rd</sup> and 97<sup>th</sup> percentile for 2 and 20 year-olds, respectively, were discarded as implausible outliers. All virtual population modeling and validation was performed

using PK-Sim<sup>®</sup> (version 9.0, Open Systems Pharmacology Suite, open-systems-pharmacology.com). Data analysis and growth curve development and validation were performed using the software R (version 3.5.3) and RStudio (version 1.1.463; RStudio, Boston, MA).

### 1.3 Growth Curve Development and Validation

While the current definition of obesity as defined by the 95<sup>th</sup> BMI percentile from the 2000 CDC growth charts was retained, the growth curves were updated with more recent demographic data to better represent the higher shift in BMI of today's children, such that a greater percent are above the obesity cutoff. Growth curves of BMI versus age were developed using pooled NHANES data from 1999 – 2016, then validated using demographic data from the PTN Data Repository. Growth curves were calculated using the same lambda-mu-sigma (LMS) estimation method that the U.S. Center for Disease Control and Prevention (CDC) used to develop the current growth curves [1]. Briefly, selected empirical percentiles of BMI for age are smoothed using locally estimated polynomial regression. Selected empirical percentiles included the 3<sup>rd</sup>, 5<sup>th</sup>, 10<sup>th</sup>, 25<sup>th</sup>, 50<sup>th</sup>, 75<sup>th</sup>, 85<sup>th</sup>, 90<sup>th</sup>, 95<sup>th</sup>, 97<sup>th</sup>, and 99<sup>th</sup> percentile BMI for age. Then, the smoothed curves for each percentile are approximated using LMS estimation method, resulting in final percentile curves closely matching the smoothed ones, thus allowing for computation of additional percentiles and z-scores using the LMS parameters. In the LMS estimation method, a Box-Cox transformation is first applied to make the BMI for age distribution approximately normal. Then, the LMS parameters are estimated using the following equations:

$$X = M(1 + LSZ)^{\frac{1}{L}}; L \neq 0 \tag{1}$$

$$X = M \exp(SZ); L = 0 \tag{2}$$

where X is the BMI value and Z is the z-score that corresponds to the percentile. LMS parameters were estimated simultaneously across the 11 percentiles at each age point as the best solution to the system of 11 equations by minimizing the sum of squared errors. Thus, the BMI percentile for a given age (X) can then be obtained from a normal distribution table from the z-score estimated using the LMS parameters. Separate growth curves were generated for male and female Asian Americans, Black Americans, Mexican Americans, and White Americans, as well as pooled males and females (ten curves total, **Figure 1, Supplementary Figure 1**).

BMI for age data for males and females for all three available racial groups included the PTN Data Repository (Asian American, Black American, and White American children, as well as pooled males and females) was used to validate the growth curves. To validate the updated growth curves, observed subjects' ages were rounded to the nearest month, then the observed BMI percentile was calculated at each age point for key percentiles (5<sup>th</sup>, 50<sup>th</sup>, 85<sup>th</sup>, and 95<sup>th</sup> percentiles). These points were overlaid on top of the updated growth curves described above, and fit to the observed PTN Data Repository points was determined visually (**Supplementary Figure 2**). Excel sheets with LMS parameters for calculating updated growth curves and BMI percentiles are provided as **Electronic Supplementary Files 2**.

#### 1.4 Calculations for Glomerular Filtration Rate (GFR)

Simulated pediatric GFR is calculated in PK-Sim<sup>®</sup> as a function of adult GFR and kidney size using the equation:

$$GFR_{ped} = \frac{GFR_{adult} * F_{age}}{V_{standard\ kidney}} \quad (3)$$

Where  $GFR_{ped}$  is the simulated pediatric GFR (in mL/min/100g kidney),  $GFR_{adult}$  is the standard adult GFR value,  $F_{age}$  is a scaling factor to account for age in children, and  $V_{standard\ kidney}$  is the volume of a standard adult kidney.

Simulated GFR values for virtual children with obesity were compared to observed values reported in the literature using a number of different GFR calculations [2]. The observed study calculated creatinine clearance (CrCl) through 24-hour urine collection and estimated GFR using the Zappitelli and Schwartz equations as follows:

$$GFR_{Zappitelli} = \frac{43.82e^{0.003*Height}}{CysC^{0.635}*SCr^{0.547}} \quad (4)$$

$$GFR_{Schwartz} = 39.1 \left(\frac{Height}{SCr}\right)^{0.516} \left(\frac{1.8}{CysC}\right)^{0.294} \left(\frac{30}{BUN}\right)^{0.169} (1.099)^{Male} \left(\frac{Height}{1.4}\right)^{0.188} \quad (5)$$

where height is in meters, CysC is cystatin C in mg/L, SCr is serum creatinine in mg/dL [2-4], BUN is blood urea nitrogen in mg/dL, and Male is an indicator variable equal to one if male.

Absolute GFR values were normalized to a number of different body size metrics, including total body weight, BMI, lean body mass (LBM) as calculated by the Peters equation, fat-free mass (FFM) as calculated by the Al-Sallami equation, and body surface area (BSA) as calculated by the Haycock equation using the following equations:

$$LBM = 3.8(0.0215 * Weight^{0.6469} * Height^{0.7236}) \quad (6)$$

$$FFM_{males} = \left[ 0.88 + \left( \frac{1-0.88}{1 + \left(\frac{Age}{13.4}\right)^{-12.7}} \right) \right] \left[ \frac{9270*Weight}{6680+(216*BMI)} \right] \quad (7a)$$

$$FFM_{females} = \left[ 1.11 + \left( \frac{1-1.11}{1 + \left(\frac{Age}{7.1}\right)^{-1.1}} \right) \right] \left[ \frac{9270*Weight}{8780+(244*BMI)} \right] \quad (7b)$$

$$BSA = Weight^{0.5378} * Height^{0.3964} * 0.024265 \quad (8)$$

where weight is in kg, height is in centimeters, age is in years, and BMI is in  $\text{kg}/\text{m}^2$  [5-7]. Note that the observed study calculated FFM using the Schaeffer equation, but this was not applicable to the simulated population since it calculates FFM using bioimpedance [8]. The final GFR comparisons are shown in **Table 2**.

### **1.5 Clinical Data for Clindamycin PBPK Modeling – External Data Study**

The External Data Study (ClinicalTrials.gov #NCT02475876) was a multicenter (n = 10), open-label, interventional PK and safety study that enrolled children aged 36 weeks postmenstrual age and 16 years of age receiving clindamycin per clinical care at the physician's discretion.

Exclusion criteria included failure to obtain consent or assent, known pregnancy or breastfeeding, history of allergic reactions to study drugs, serum creatinine >2 mg/dL, alanine aminotransferase >250 U/L or aspartate transaminase >500 U/L, or on extracorporeal membrane oxygenation support. Protocol specified clindamycin dose was 9 mg/kg, 12 mg/kg, and 10 mg/kg every 8 hours for subjects between 1-5 months, >5 months – 6 years, and >6 years to 16 years of age, respectively. PK samples were collected at protocol specified times, which were after the 1<sup>st</sup> and the >6<sup>th</sup> dose at between 0-10 min and 2-4 h after the dose and <30 minutes before the next dose. The plasma samples were quantified at a single central laboratory (OpAns, LLC, Durham, NC, USA) using a validated high-performance liquid chromatography-tandem mass spectrometry assay with a lower limit of quantitation of clindamycin of 50 ng/L as previously described [9]. The External Data Study protocol was approved by the institutional review board of participating institutions, and informed consent was obtained from the parent or guardian and assent from the subject when appropriate.



## 1.6 Clindamycin Oral Absorption Model Development and Evaluation

In this study, we also developed an oral clindamycin hydrochloride absorption model using available adult data from the literature in order to simulate exposure for 15 observed children with obesity who received oral doses (**Supplementary Table 16**). Clindamycin hydrochloride dosing was adjusted using the salt factor (0.9151) and simulated as a clindamycin dose. Intestinal transcellular permeability and Weibull parameters were optimized using digitized data across seven adult oral clindamycin studies using the Levenberg-Marquardt algorithm [10]. Final clindamycin PBPK model parameters are shown in **Supplementary Table 6**. For five pediatric subjects who received both intravenous and oral doses (all of whom had samples taken after an oral dose), all doses were modeled as clindamycin doses adjusted using the salt factor.

## 2 SUPPLEMENTARY RESULTS

### 2.1 Virtual Population Demographics

Each virtual child's height in the virtual population is randomly selected from published distributions from the International Commission on Radiological Protection (ICRP) database depending on the child's age. Simulated height was reflective of the ICRP values and increased with age (**Supplementary Figure 22**).

Each virtual child's weight is determined as the sum of the 19 organ compartments modeled in PK-Sim<sup>®</sup>. Individual organ weights are selected from published ICRP distributions depending on the child's age, with additional scaling factors introduced for children with obesity. The remaining extra weight is added to both the adipose and skin organs to increase the virtual child's weight to a BMI within the obese range (e.g.,  $\geq 95^{\text{th}}$  percentile BMI for age and sex). Simulated height and weight were correlated, with a rightward shift in the height-weight curve

for children with versus without obesity observed, reflecting an increase in weight (Supplementary Figure 23).

## 2.2 Clindamycin Oral Absorption Model

The clindamycin oral absorption model was able to capture the majority of digitized adult data, with an overall AFE of 0.90 (mean [range] of 0.99 [0.50, 2.23] across seven studies of orally dosed clindamycin in healthy adult volunteers) (Supplementary Table 16, Supplementary Figure 24).

## 2.3 Incorporating AAG Concentration into $f_u$ for Clindamycin

Expanding the previously developed pediatric clindamycin PBPK model to include children with obesity first resulted in 64% of observed concentrations falling within the 90% model prediction interval (with 26% above and 10% below), and an overall AFE of 0.76. Exploring model misspecification revealed a trend in increasing underestimation of observed concentrations with increasing AAG concentration (Supplementary Figure 25). Thus, the fraction unbound for each observed subject was adjusted based on their individual AAG concentration using the equation:

$$f_{u,ped} = \frac{1}{1 + \left(\frac{AAG_{ped}}{AAG_{adult}}\right)^{\left(\frac{1-f_{u,adult}}{f_{u,adult}}\right)}} \quad (9)$$

where  $f_{u,ped}$  is the AAG-adjusted fraction unbound for the observed pediatric subject,  $AAG_{ped}$  is the reported AAG concentration for the observed pediatric subject,  $AAG_{adult}$  is the upper or lower bound reference healthy adult AAG concentration (0.77 and 1.46 mg/mL, respectively), and  $f_{u,adult}$  is the reported adult fraction unbound [11-12]. After adjusting fraction unbound using the AAG concentration, the model captured observed concentrations from children without obesity well, with 74% of observed concentrations falling within the 90% model prediction interval (15% above and 11% below) and a revised AFE of 0.88 (Supplementary Figure 26).

Seventy-seven percent of concentrations from children with obesity fell within the 90% model prediction interval (7% above and 16% below) with an overall AFE of 1.09, following adjusting the fraction unbound (**Supplementary Figures 8, 27**). No further trends in model misspecification were identified by study, age, body size, or AAG concentration (**Supplementary Figure 27**).

### 3 SUPPLEMENTARY FIGURES

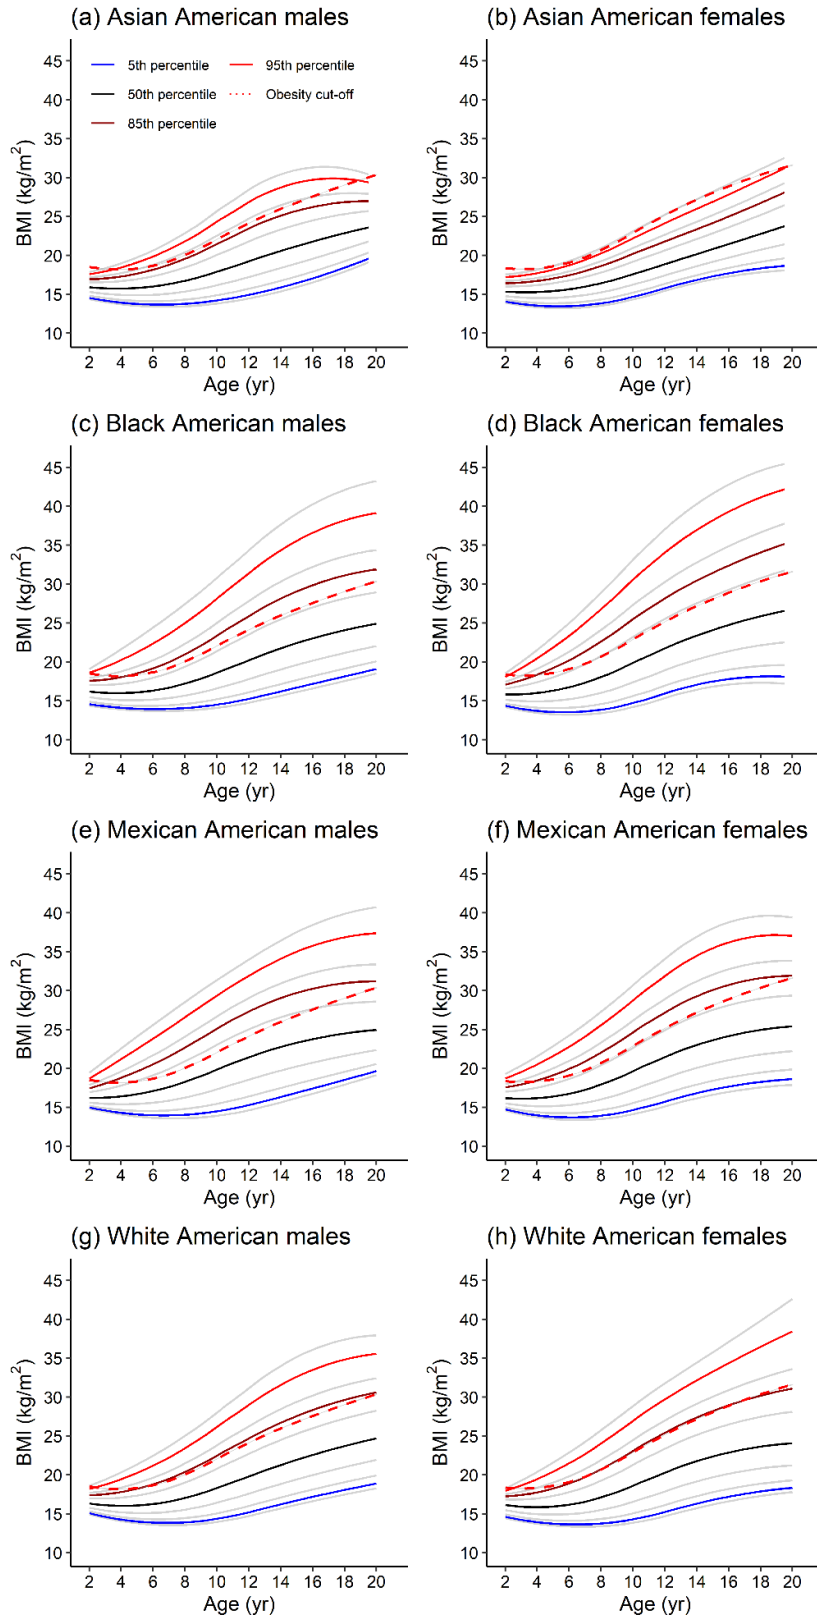

**Supplementary Figure 1.** Updated growth curves based on NHANES pooled data for male and female groups. Key BMI percentiles are highlighted in blue (5<sup>th</sup> percentile), black (50<sup>th</sup> percentile), dark red (85<sup>th</sup> percentile), and red (95<sup>th</sup> percentile). The BMI cutoff for obesity as defined by the CDC is represented by the bold, red dashed line, such that children with a BMI above that line for a given age are considered obese.

BMI, body mass index; CDC, Center for Disease Control and Prevention; NHANES, National Health and Nutrition Examination Survey

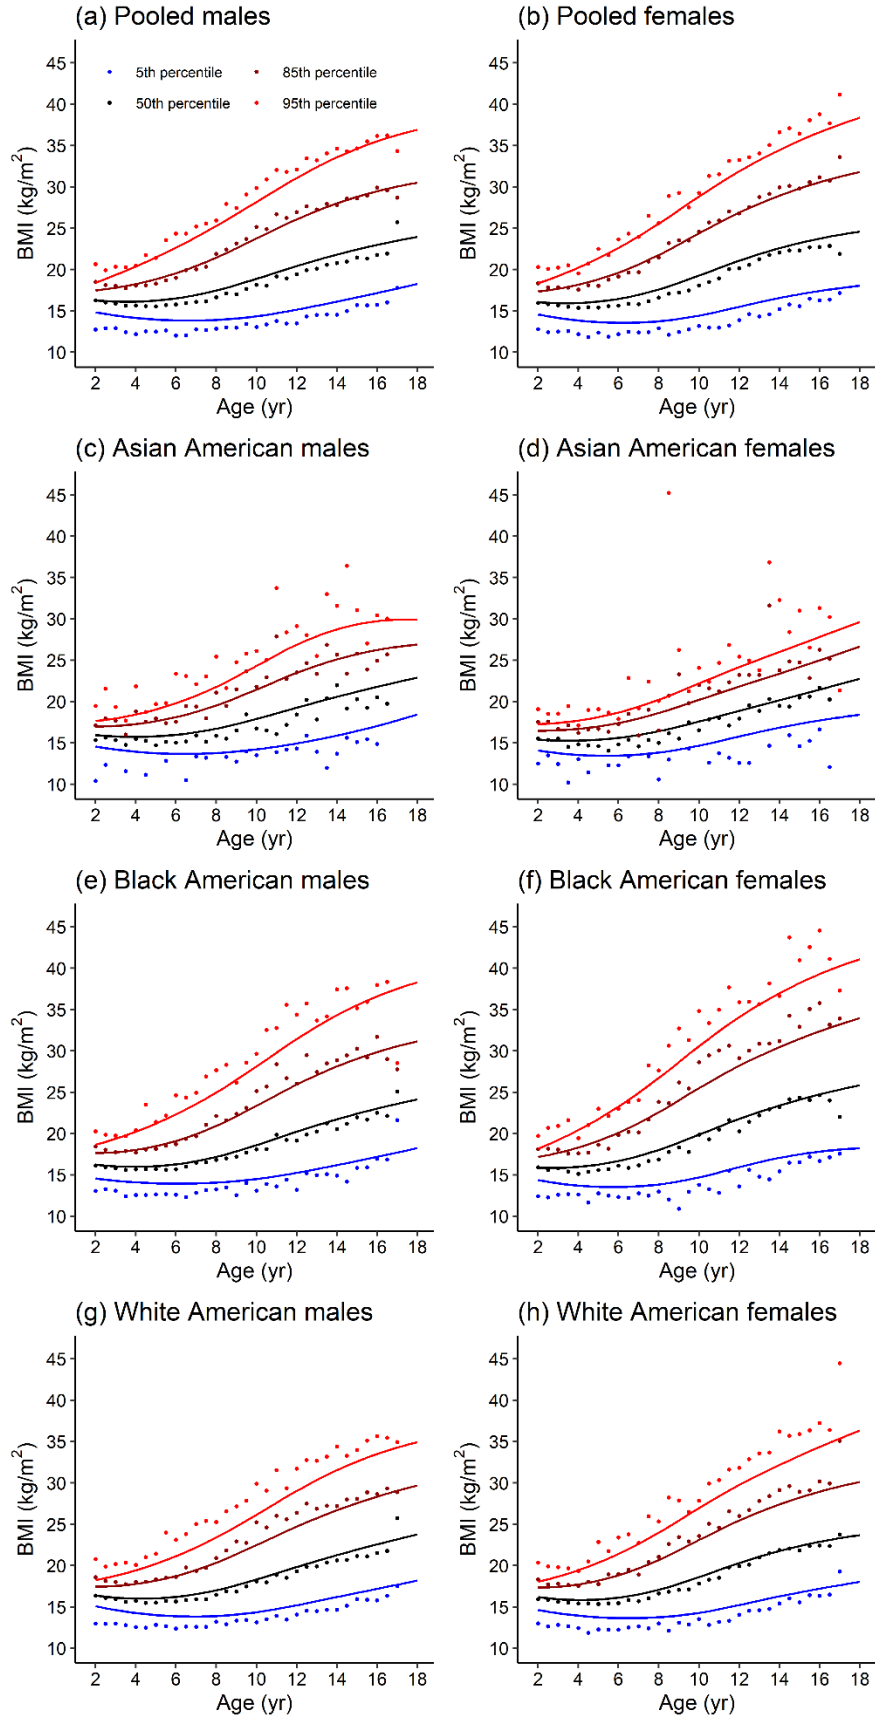

**Supplementary Figure 2.** Validation of updated growth curves for males and female groups. Key BMI percentiles are represented in blue (5<sup>th</sup> percentile), black (50<sup>th</sup> percentile), dark red (85<sup>th</sup> percentile), and red (95<sup>th</sup> percentile). Solid lines are the updated growth curves based on pooled NHANES data, and points represent the BMI for a given percentile for a given age bin based on demographic data obtained from the PTN Data Repository.

BMI, body mass index; NHANES, National Health and Nutrition Examination Survey; PTN, Pediatric Trials Network

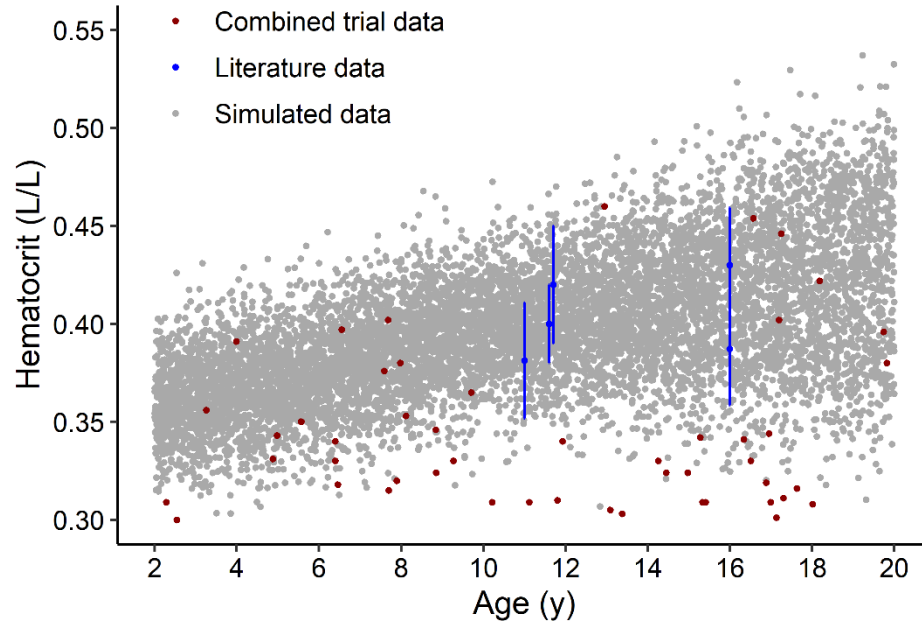

**Supplementary Figure 3.** Hematocrit versus age for virtual and real-world children with obesity. Simulated hematocrit values from virtual children with obesity ( $n = 10,000$ ) generated from PK-Sim<sup>®</sup> are shown in gray, reported hematocrit values (mean  $\pm$  standard deviation) found in the literature search from children with obesity are shown in blue, and individual observed hematocrit values from children ( $n = 136$ ) with obesity in the clinical trial data are shown in red. See **Table 1** for combined trial data summary and **Supplementary Table 9** for literature hematocrit values.



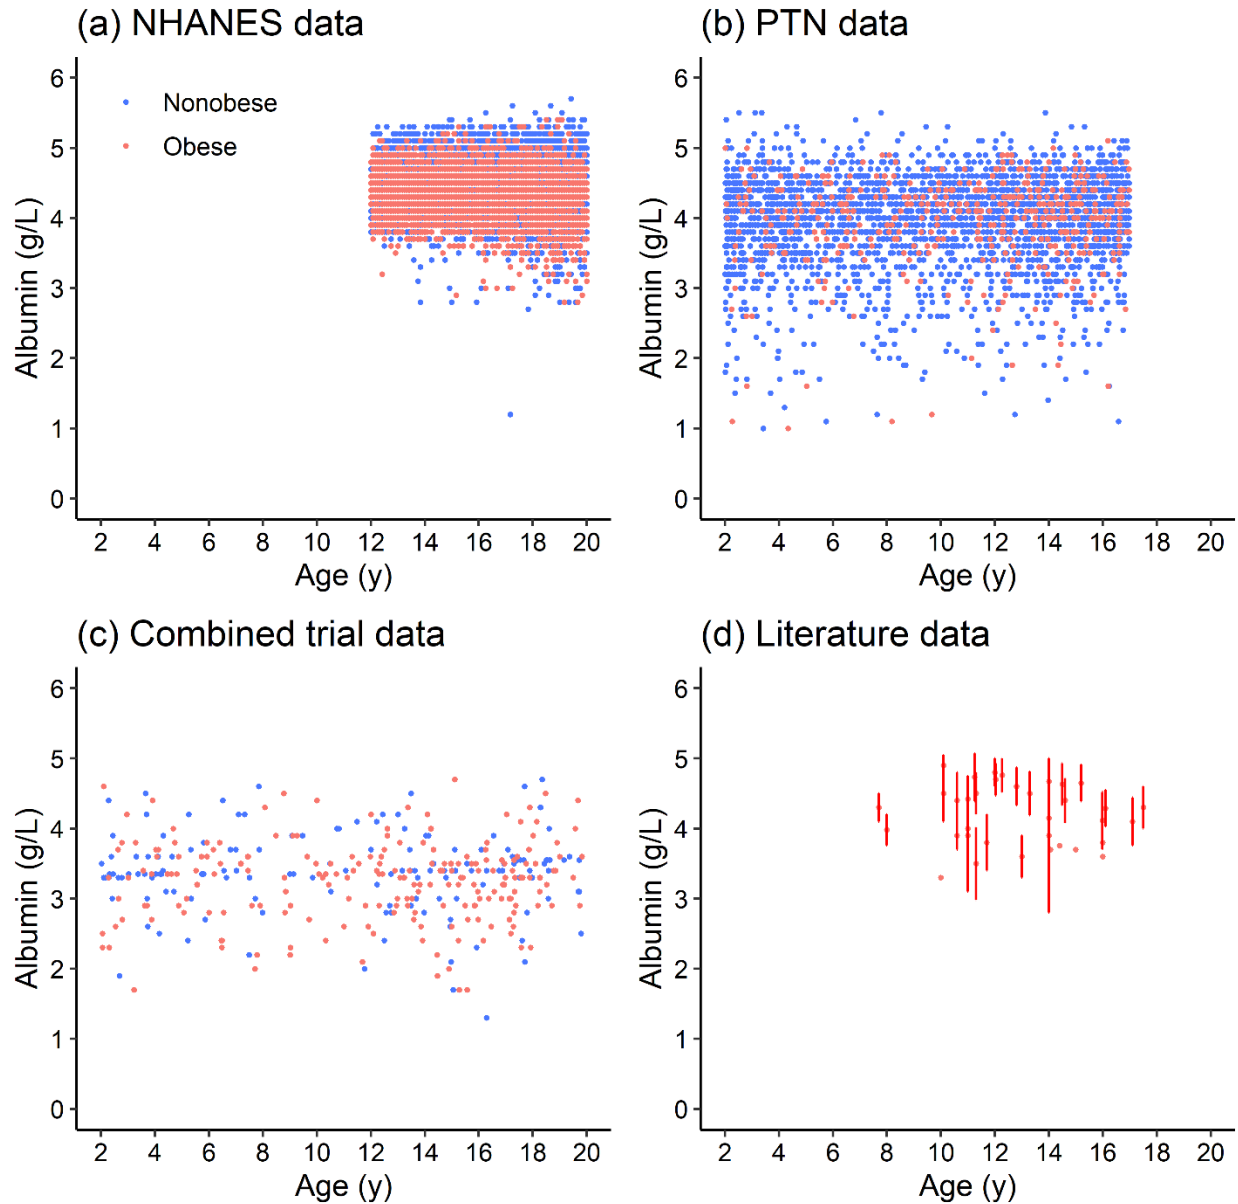

**Supplementary Figure 4.** Observed albumin concentration versus age for children without (blue) and with (red) obesity from four different data sources – individual values from NHANES survey (n = 14,293) (a), PTN data repository (n = 3,193) (b), and combined trial data (n = 393) (c), and mean values (mean  $\pm$  standard deviation) found in the literature search (d). Data sources are shown in separate panels for better visualization. Note that albumin concentrations were only reported for children >12 years for NHANES.

NHANES, National Health and Nutrition Examination Survey; PTN, Pediatric Trials Network

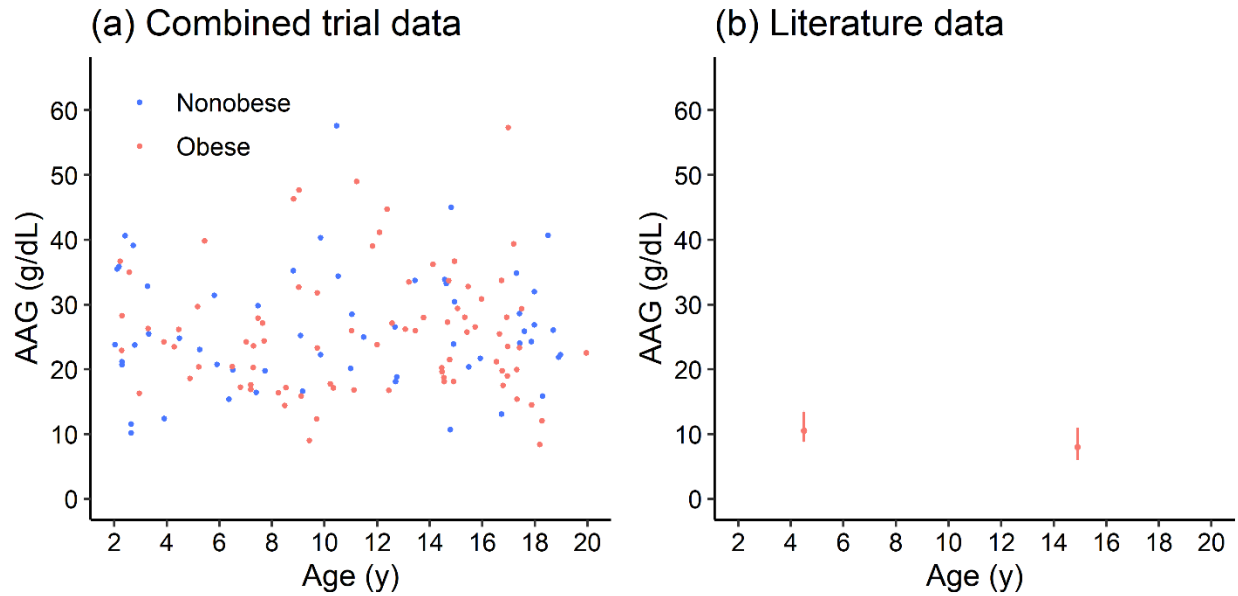

**Supplementary Figure 5.** AAG concentration versus age for children without (blue) and with (red) obesity, including observed values from the combined trial data ( $n = 60$  and  $88$  for children without at with obesity, respectively) (a) and reported values (mean  $\pm$  standard deviation) from the literature search (b) with corresponding standard deviation error bars. Data sources are shown in separate panels for better visualization.

AAG,  $\alpha$ 1-acid glycoprotein

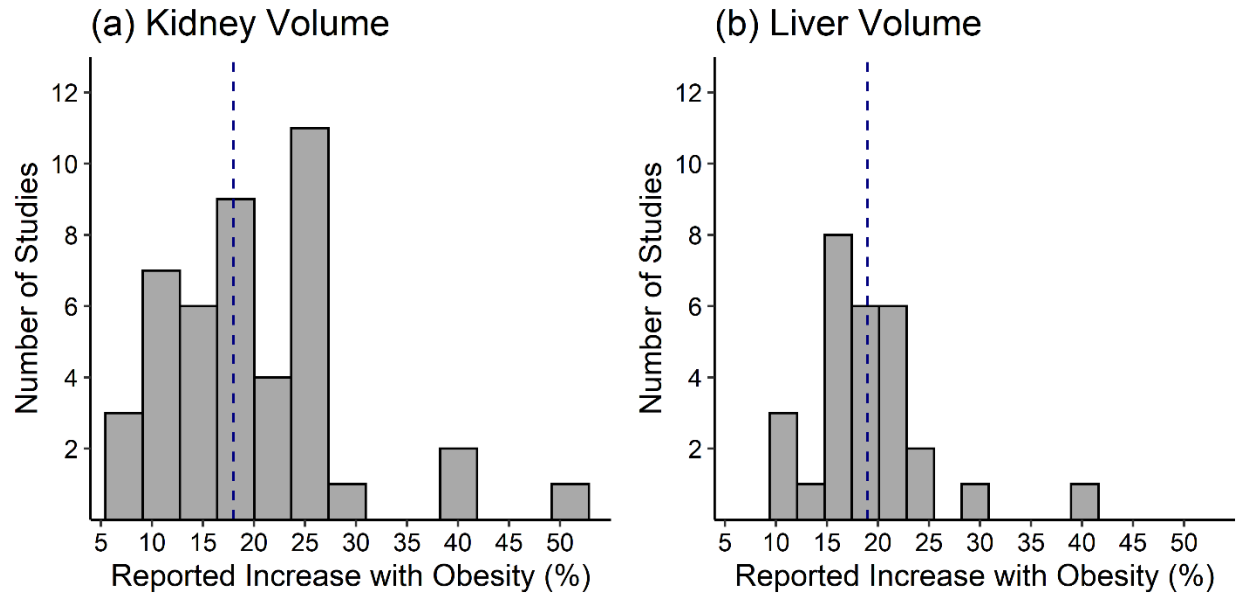

**Supplementary Figure 6.** Reported percent increase in children’s kidney volume (a) and liver volume (b) with obesity for a number of studies found in the literature search. Dashed lines represent the median increase (18% and 19% for kidney and liver, respectively) across all of the studies for reference.

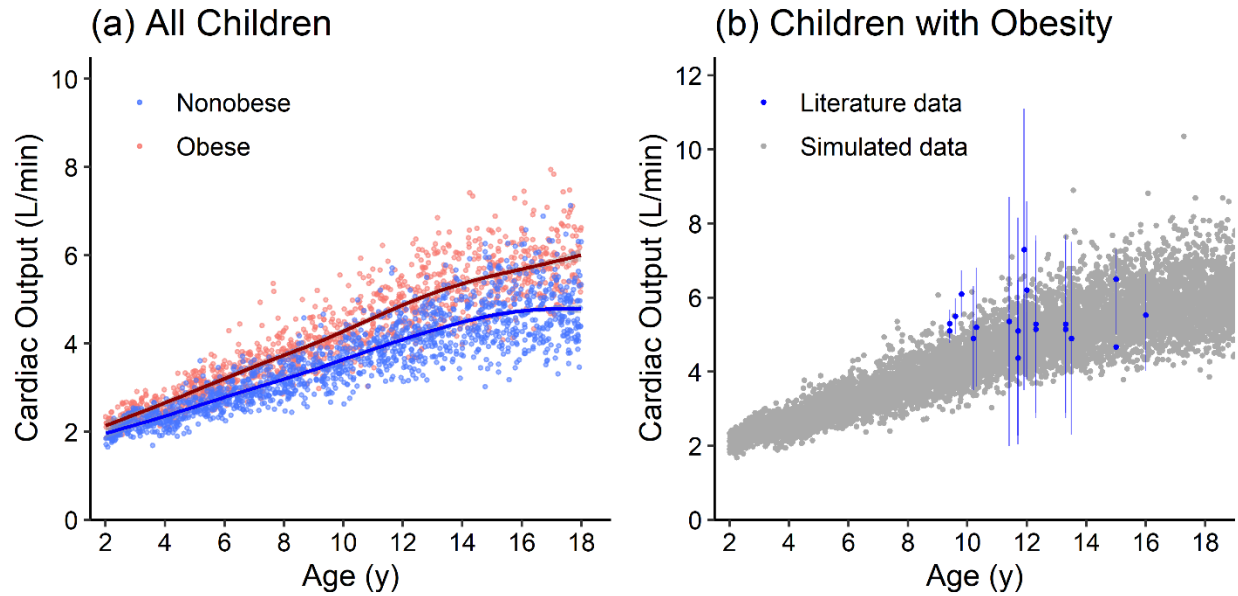

**Supplementary Figure 7.** Simulated cardiac output in virtual children. Panel (a) represents changes in cardiac output with age for 1,500 virtual children without (blue) and 1,500 virtual children with obesity (red). Solid lines represent the central tendency, which is the Loess line as calculated by the generalized additive model. Panel (b) represents simulated versus reported cardiac output values for children with obesity. Gray points represent simulated cardiac output for 10,000 virtual children, and blue points represented reported values with corresponding reported variation.

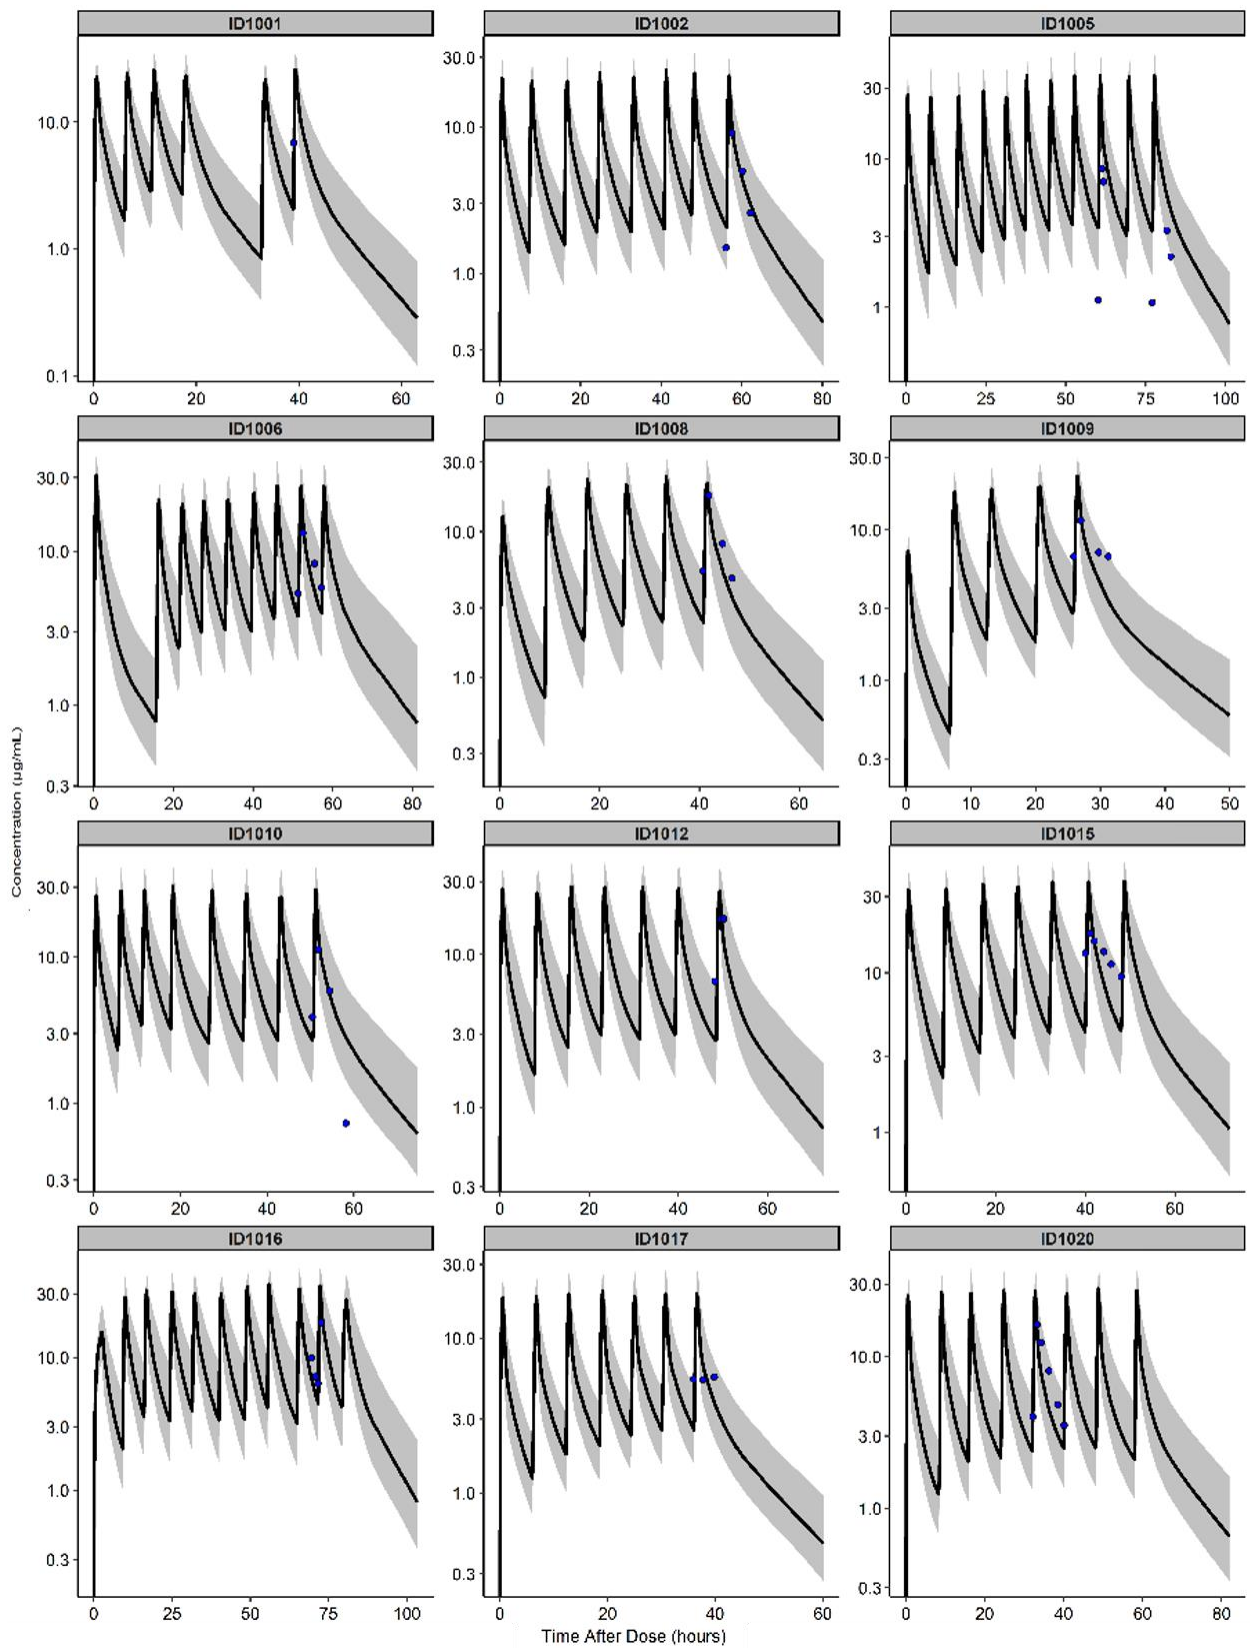

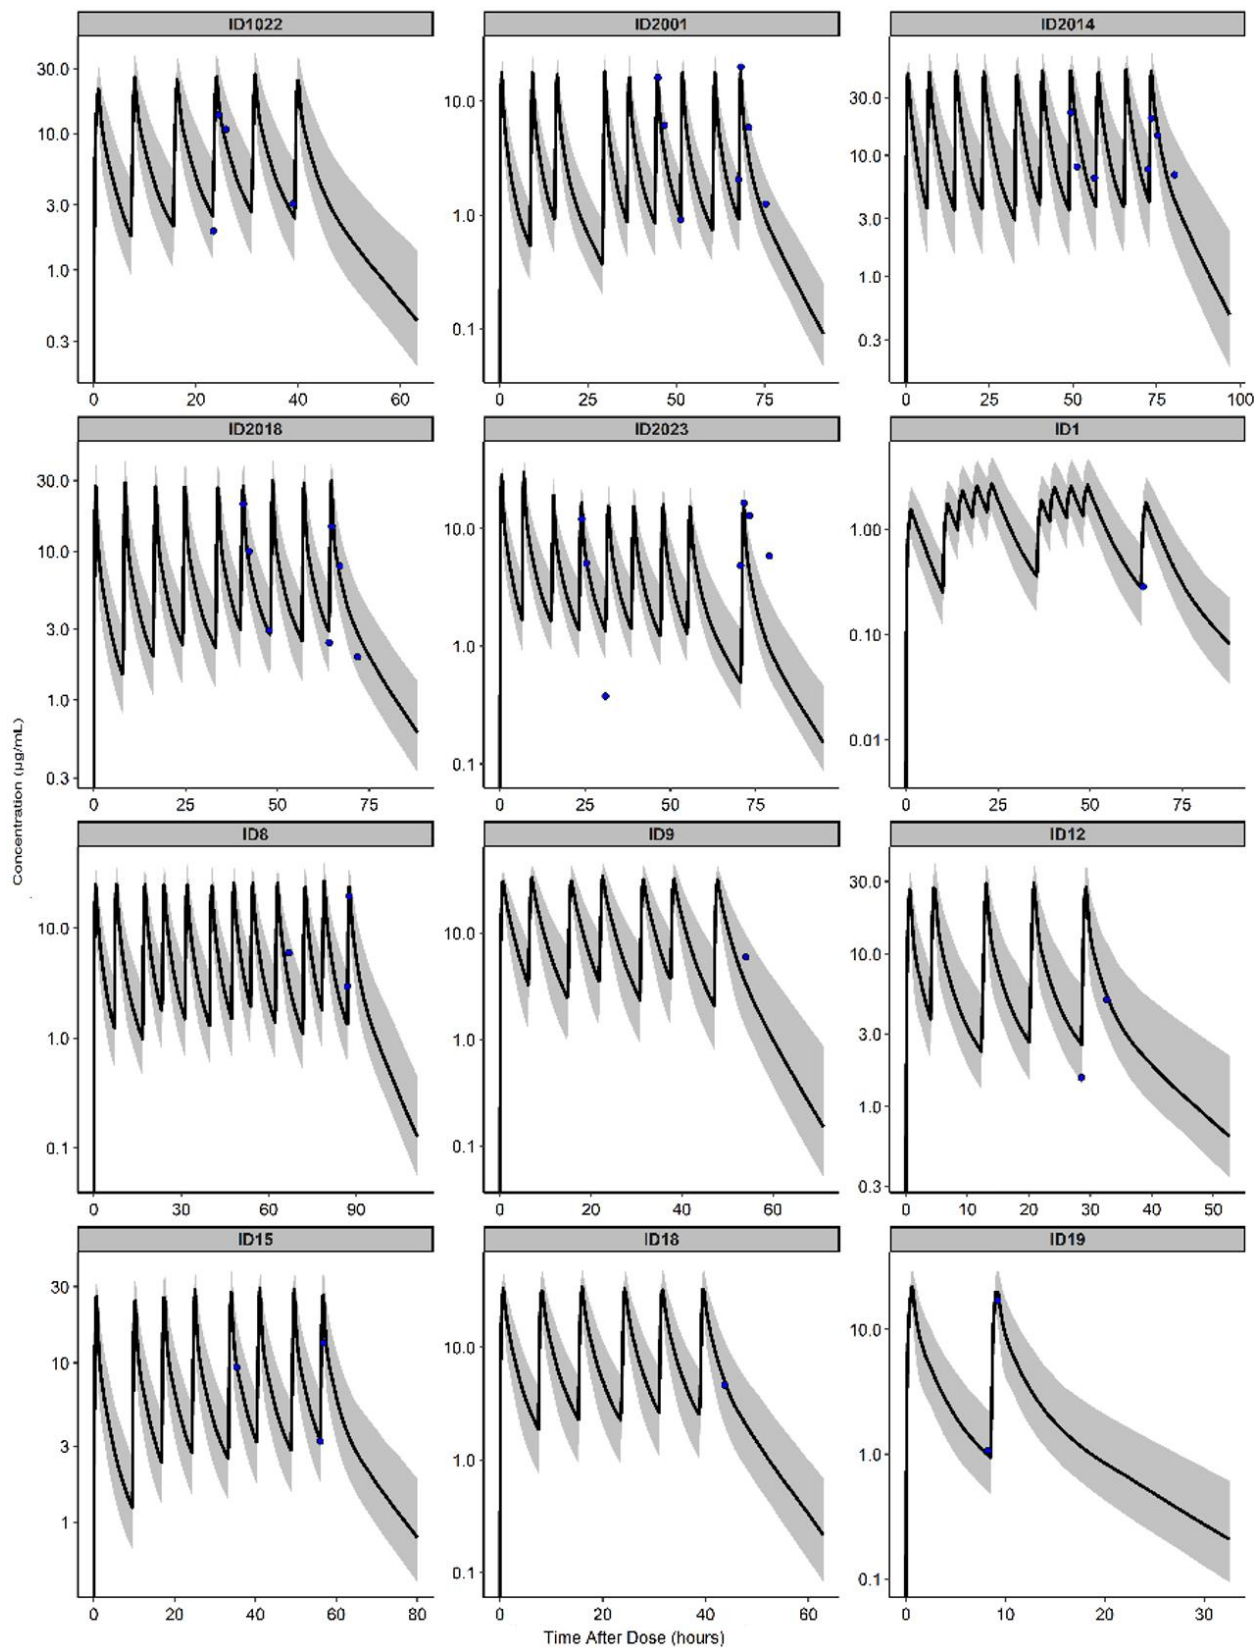

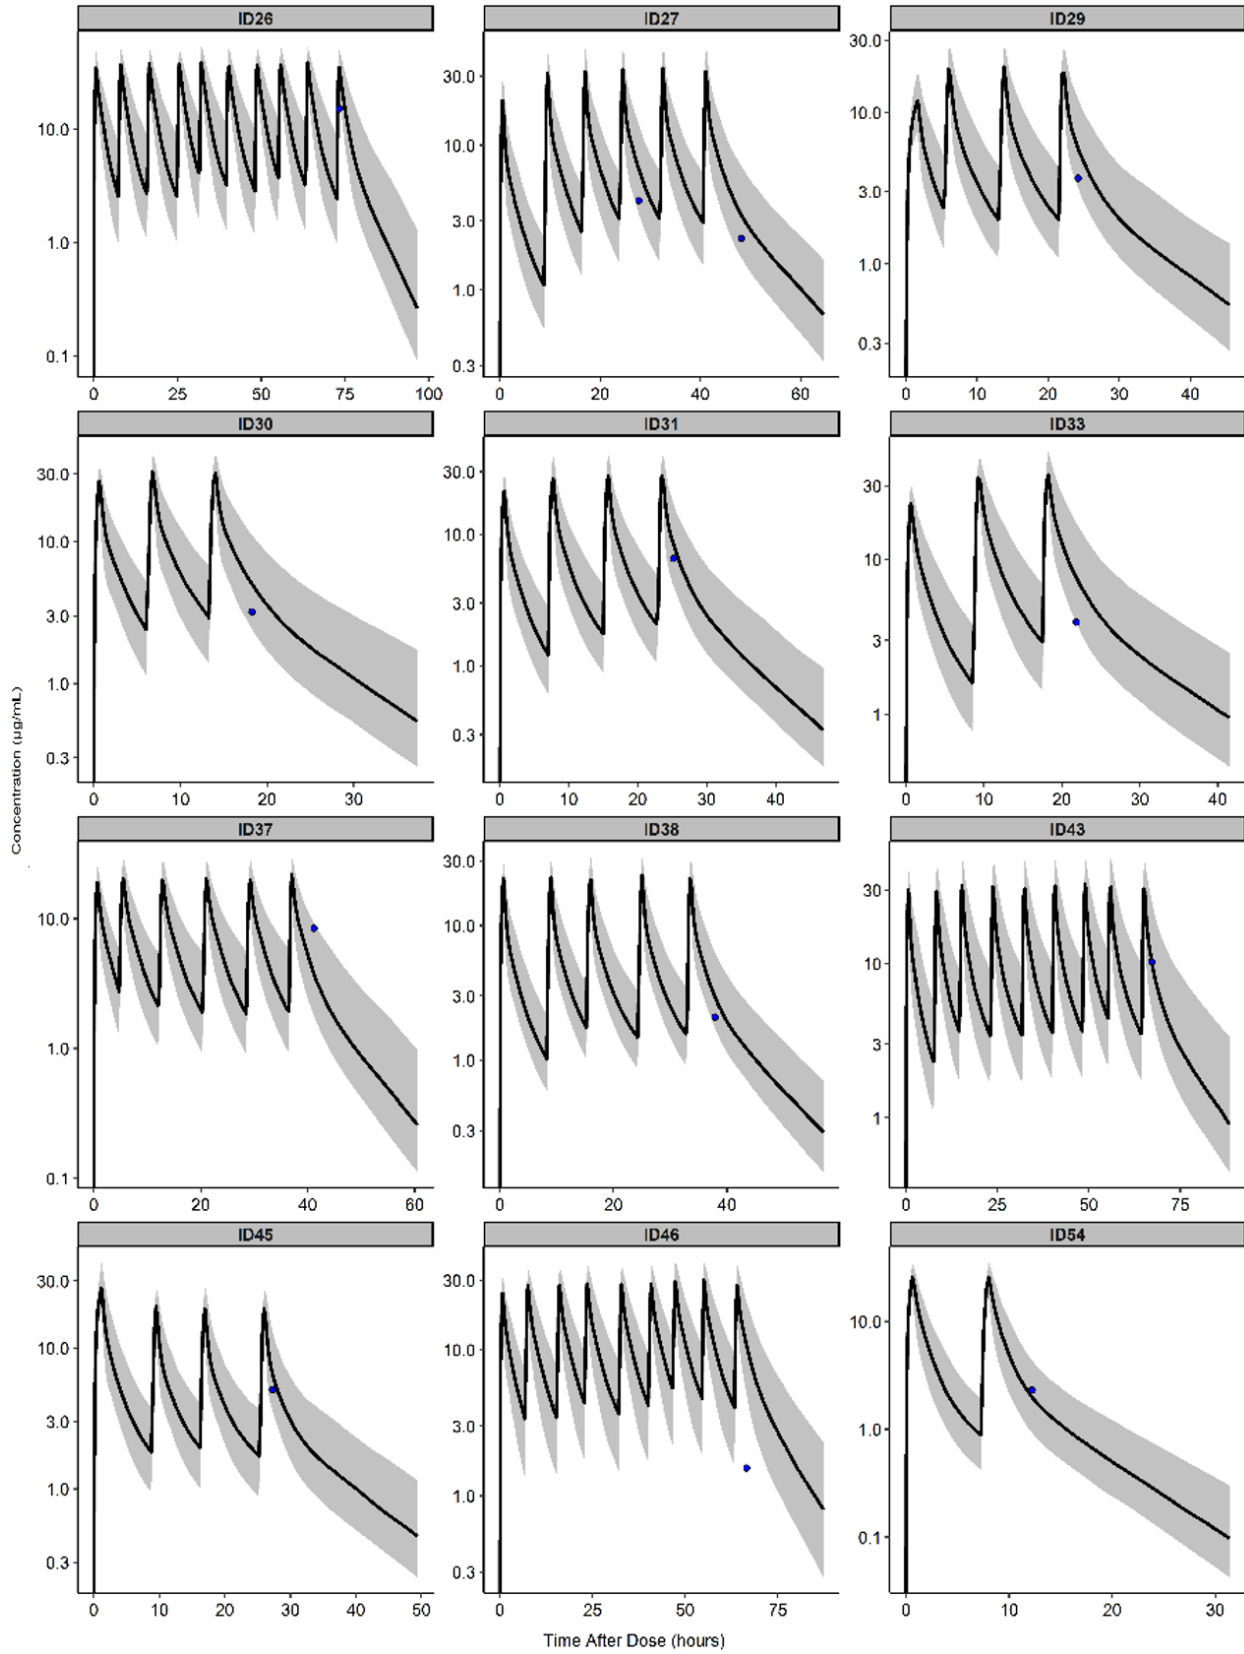

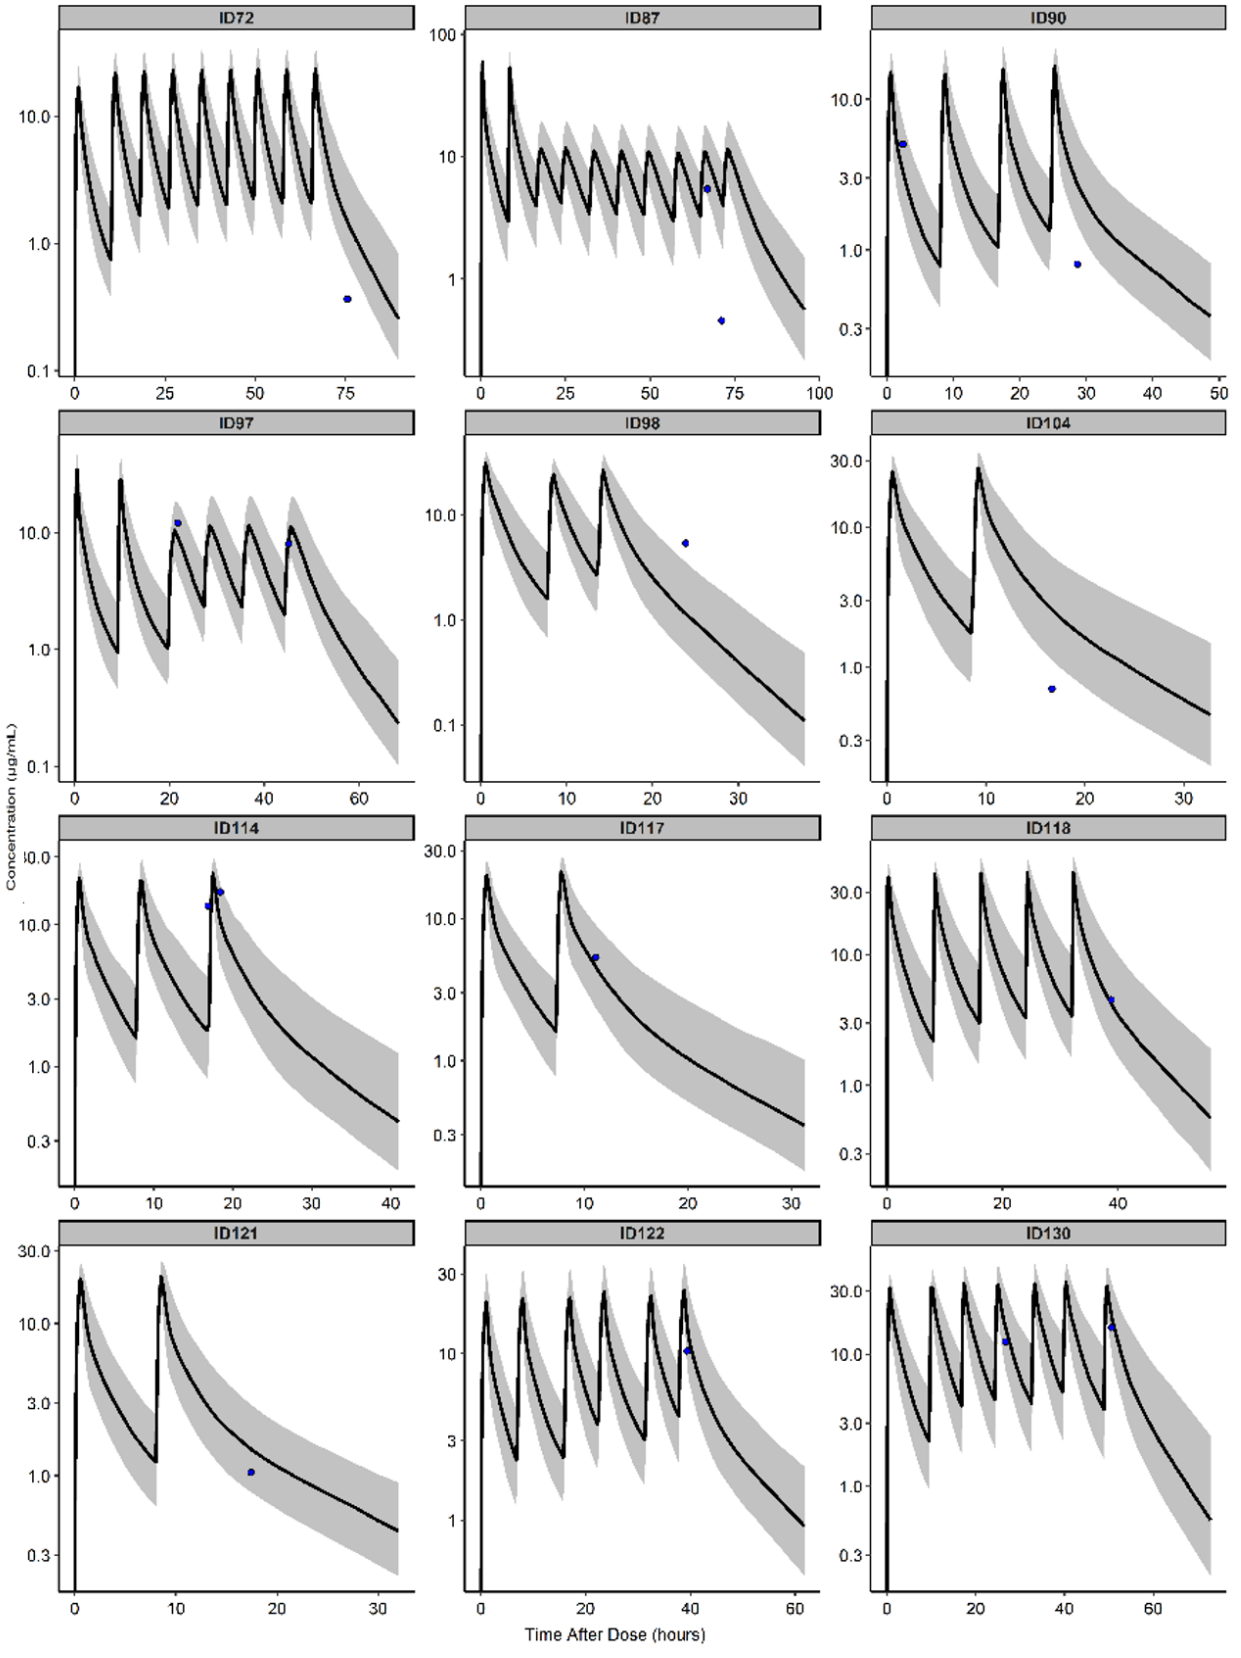



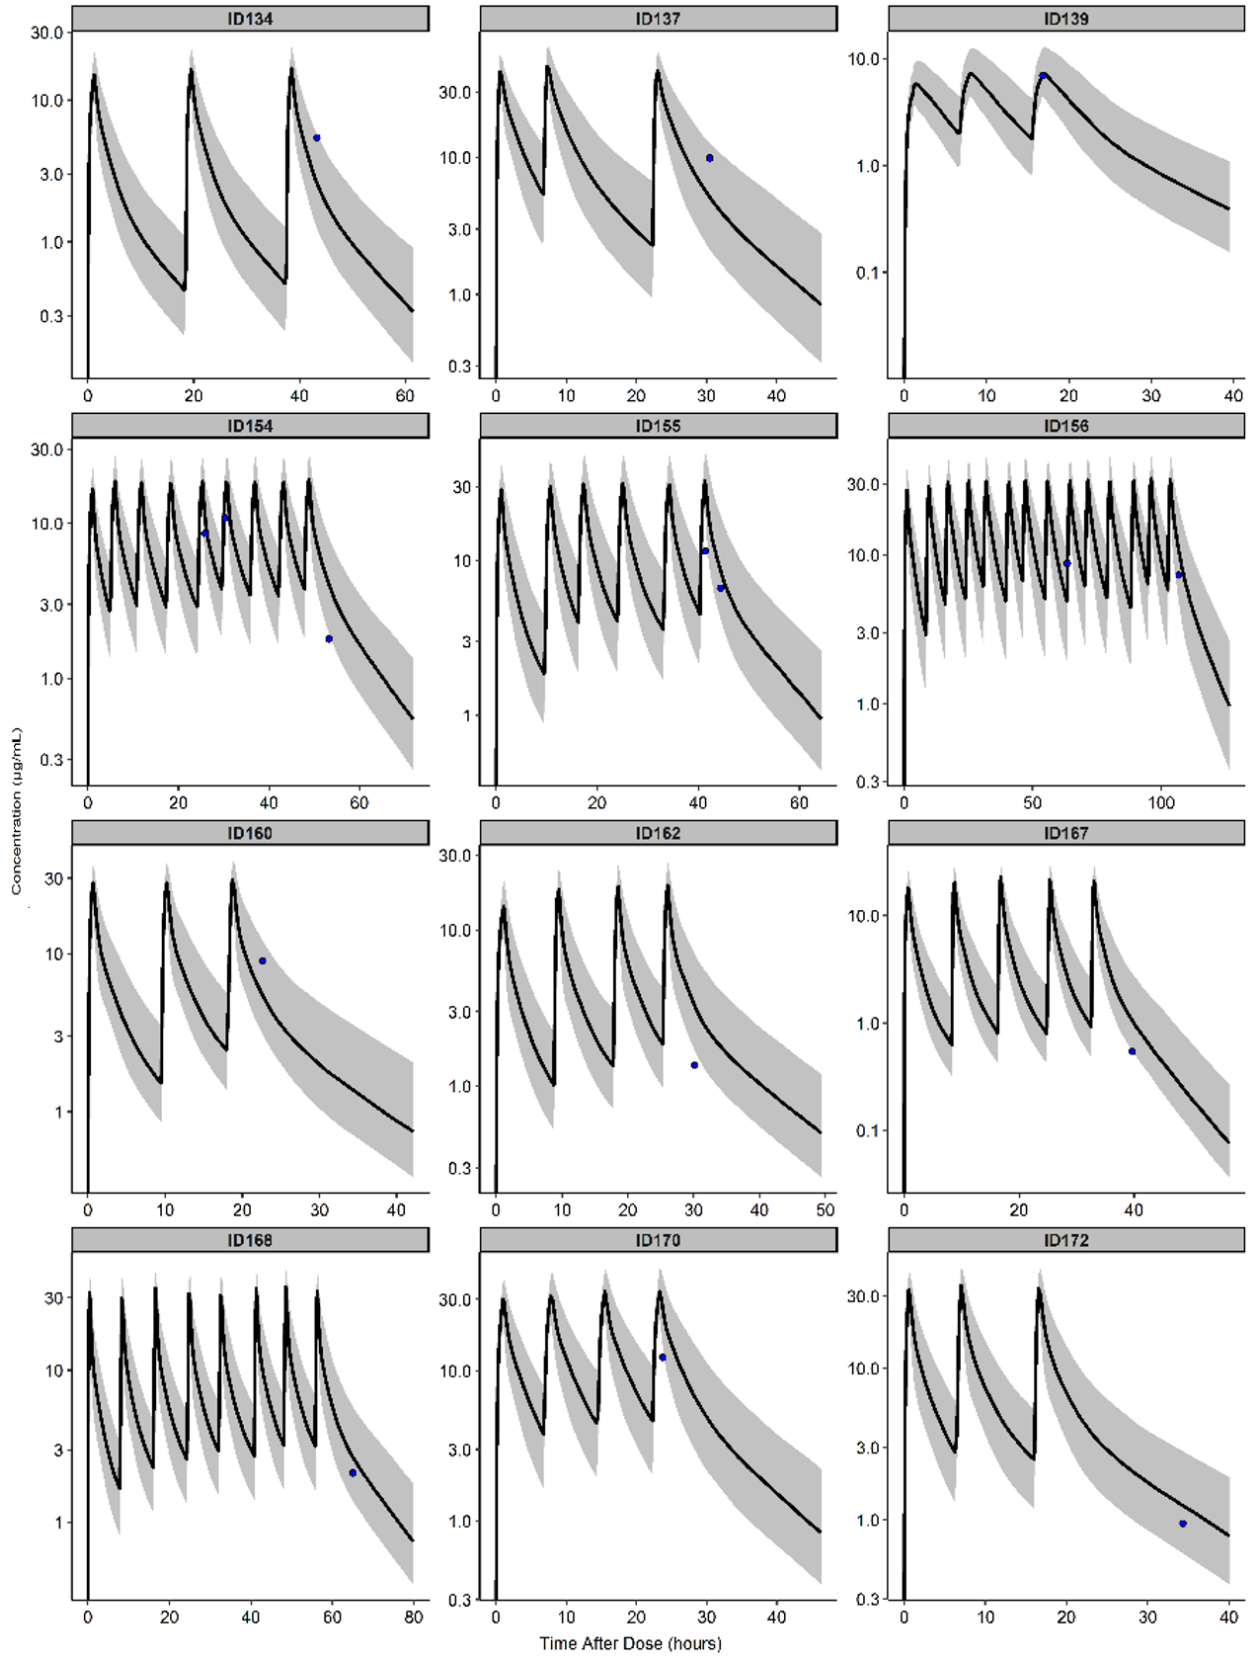

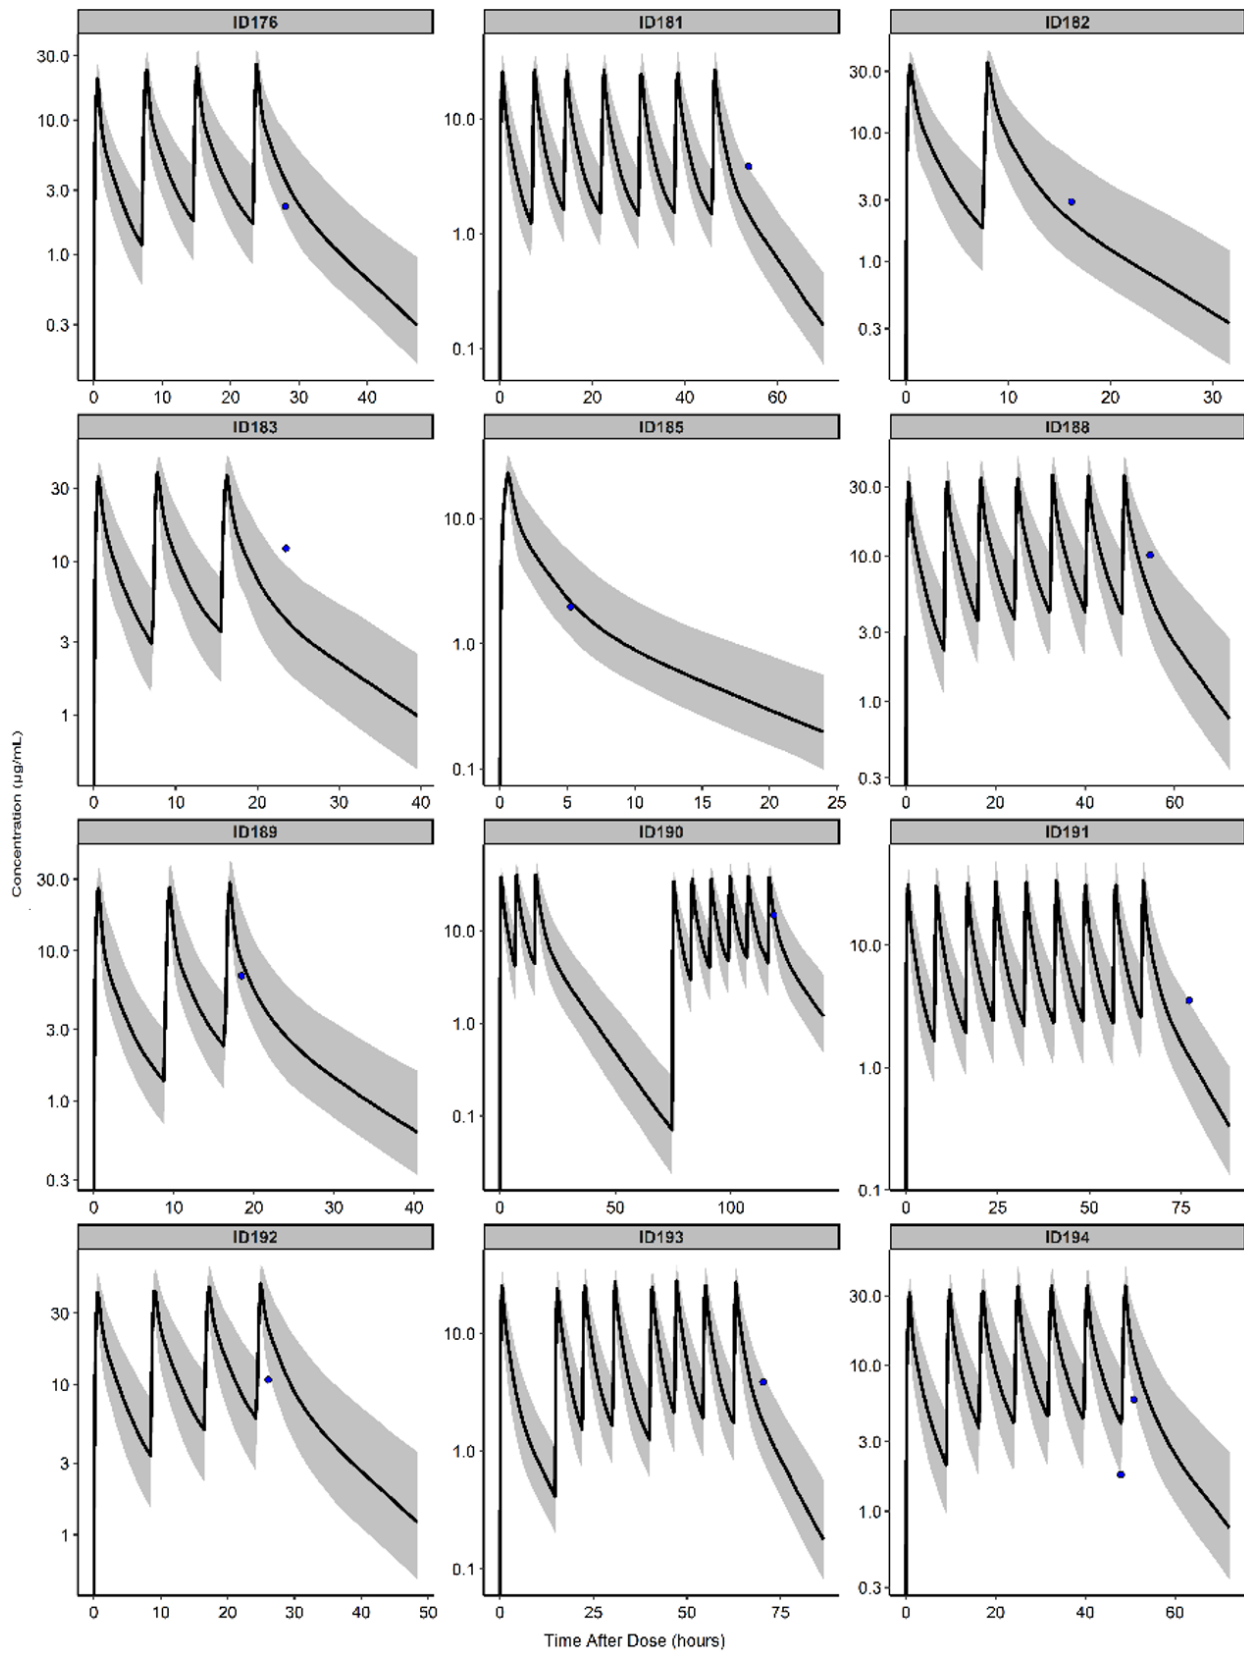

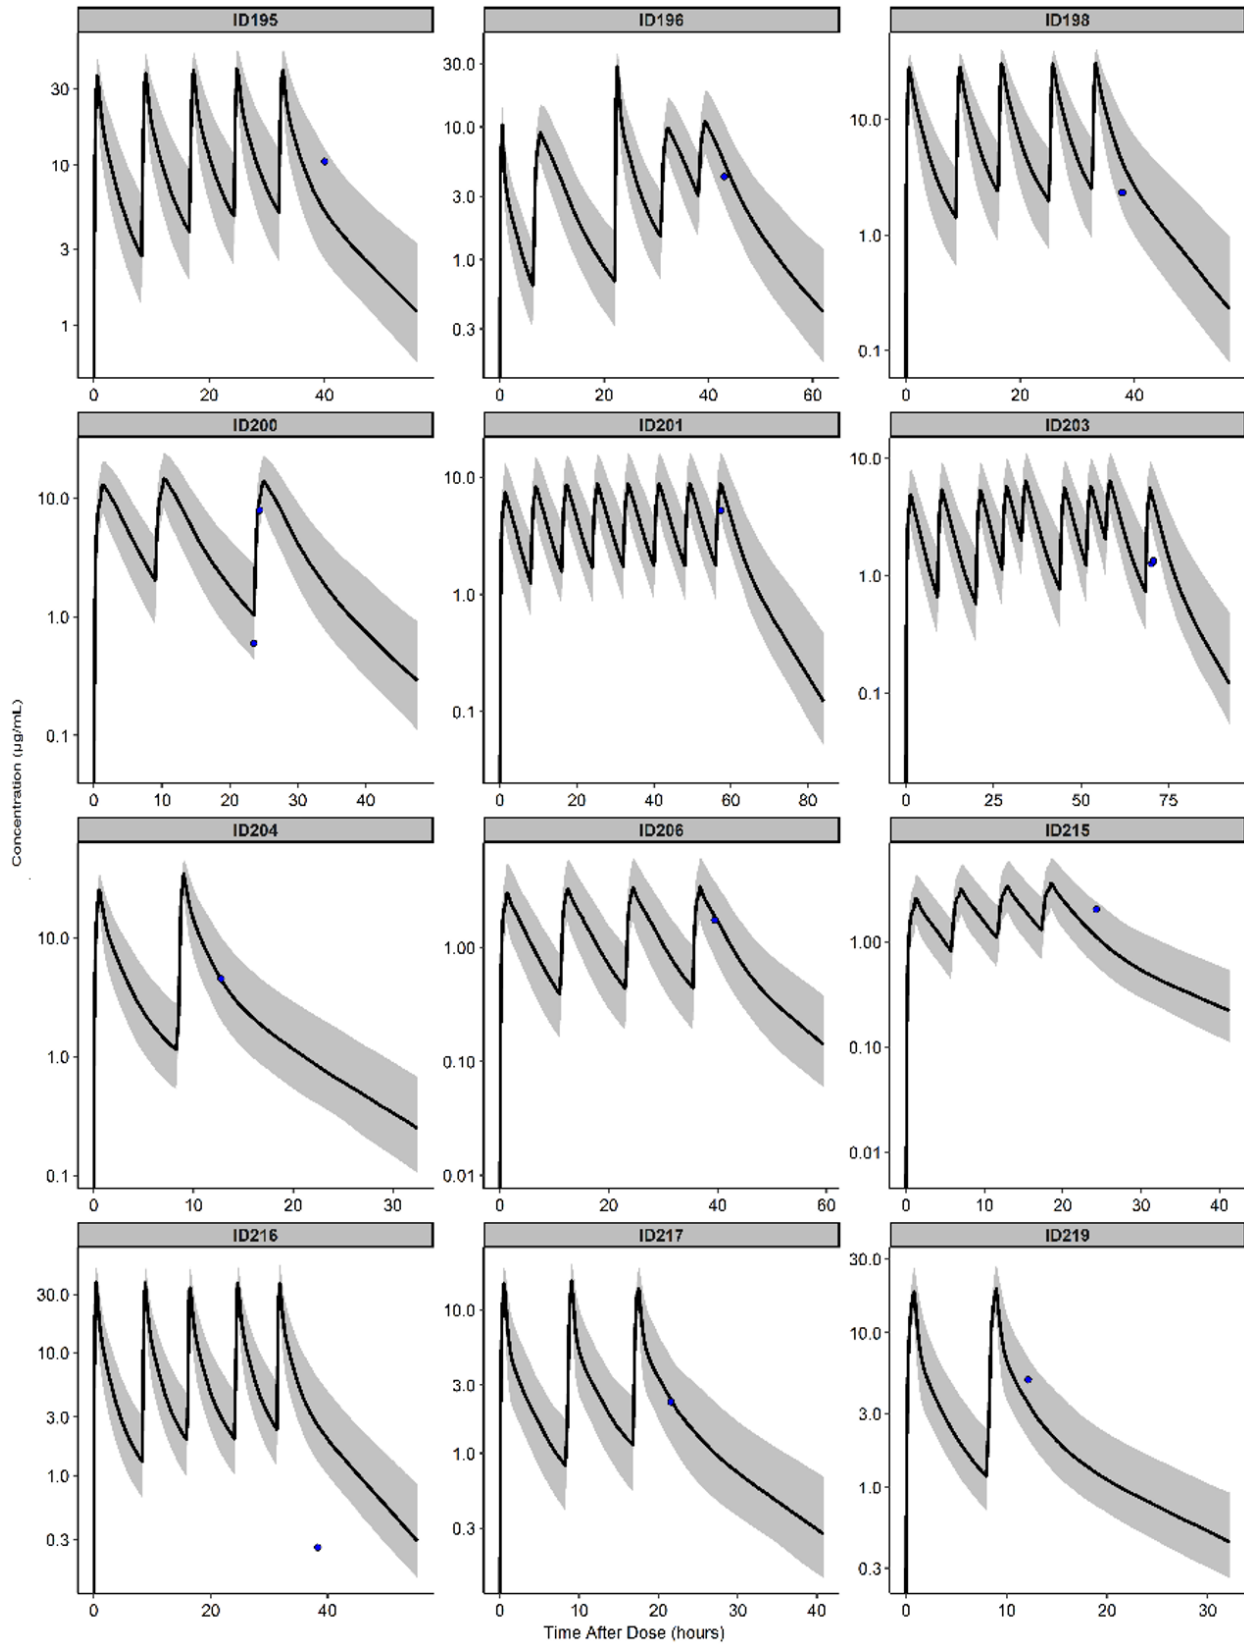

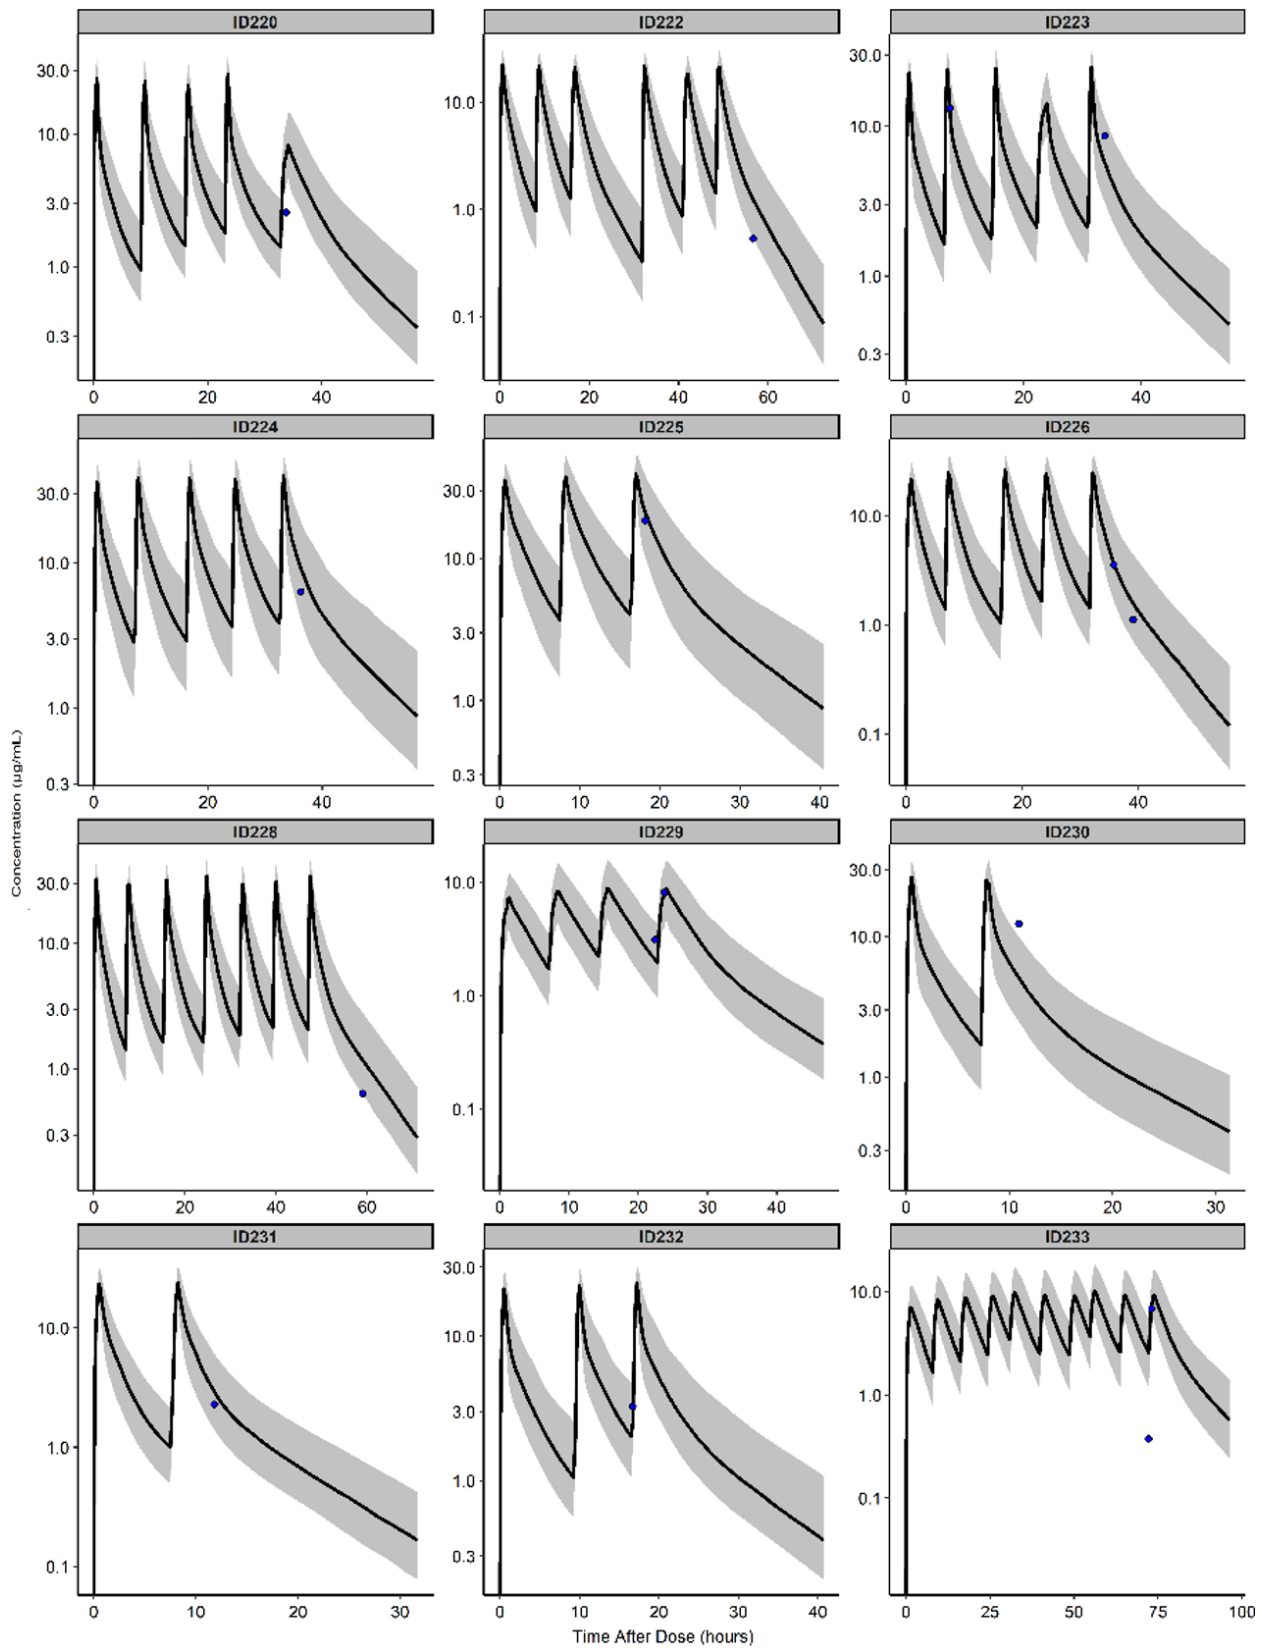

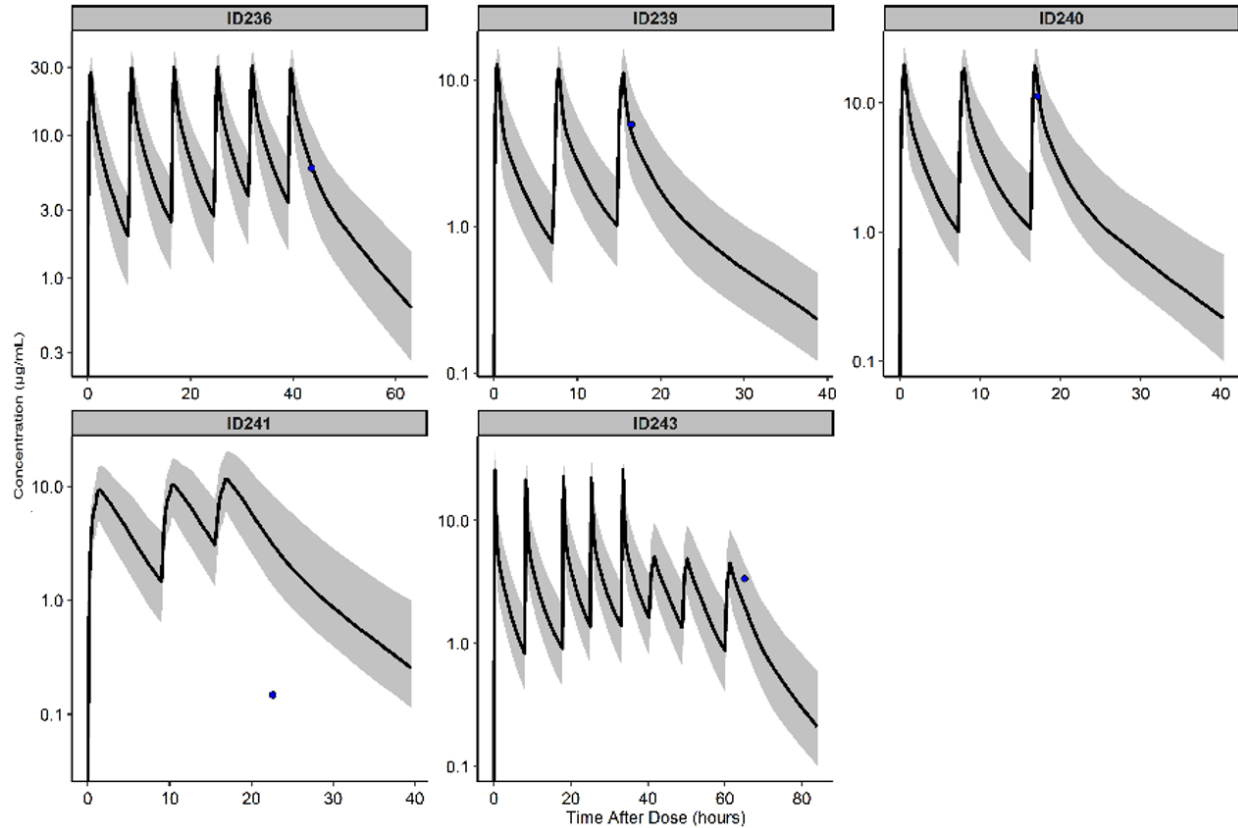

**Supplementary Figure 8.** Population simulations (n=250) of plasma clindamycin concentration after adjusting fraction unbound using reported AAG concentrations using “individualized populations” for each observed pediatric subject with obesity that are matched to that particular subject’s demographics and dosing regimen. The shaded regions are the 90% model prediction interval, which are overlaid with points representing observed plasma concentrations from the POP01, CLIN01, and External Data Study.

AAG,  $\alpha$ 1-acid glycoprotein; CLIN01, Safety and Pharmacokinetics of Clindamycin in Pediatric Subjects with BMI  $\geq$  85<sup>th</sup> Percentile (ClinicalTrials.gov #NCT01744730) Study; POP01, Pharmacokinetics of Understudied Drugs Administered to Children Per Standard of Care (ClinicalTrials.gov #NCT01431326) Study

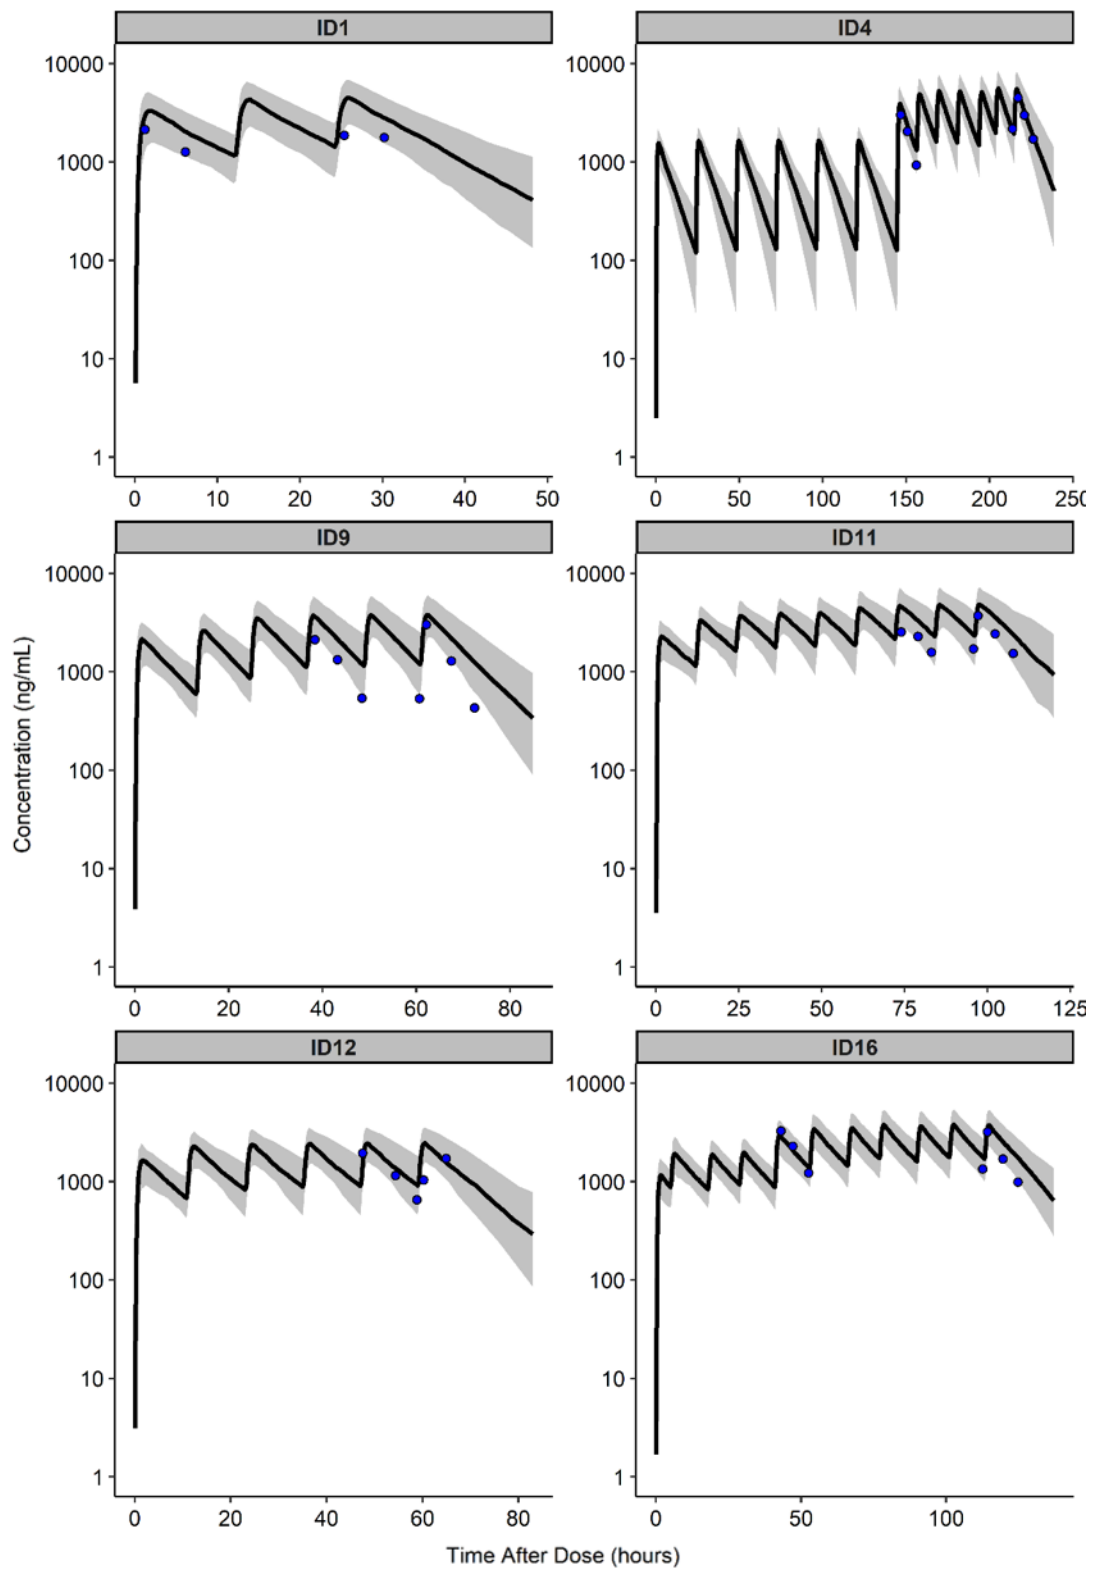

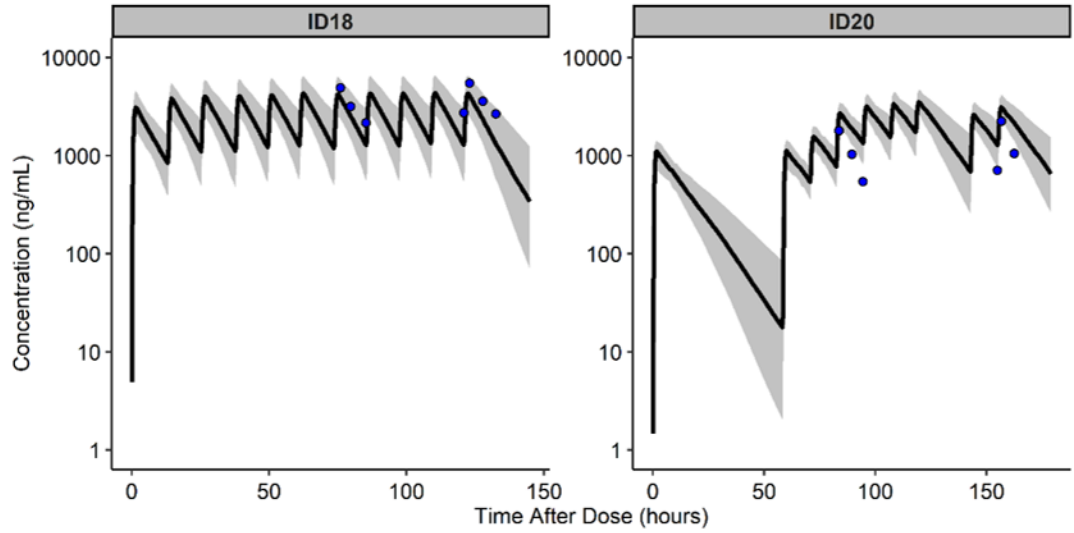

**Supplementary Figure 9.** Population simulations (n=250) of plasma trimethoprim concentration using “individualized populations” for each observed pediatric subject without obesity that are matched to that particular subject’s demographics and dosing regimen. The shaded regions are the 90% model prediction interval, which are overlaid with points representing observed plasma concentrations from the External Data Study.

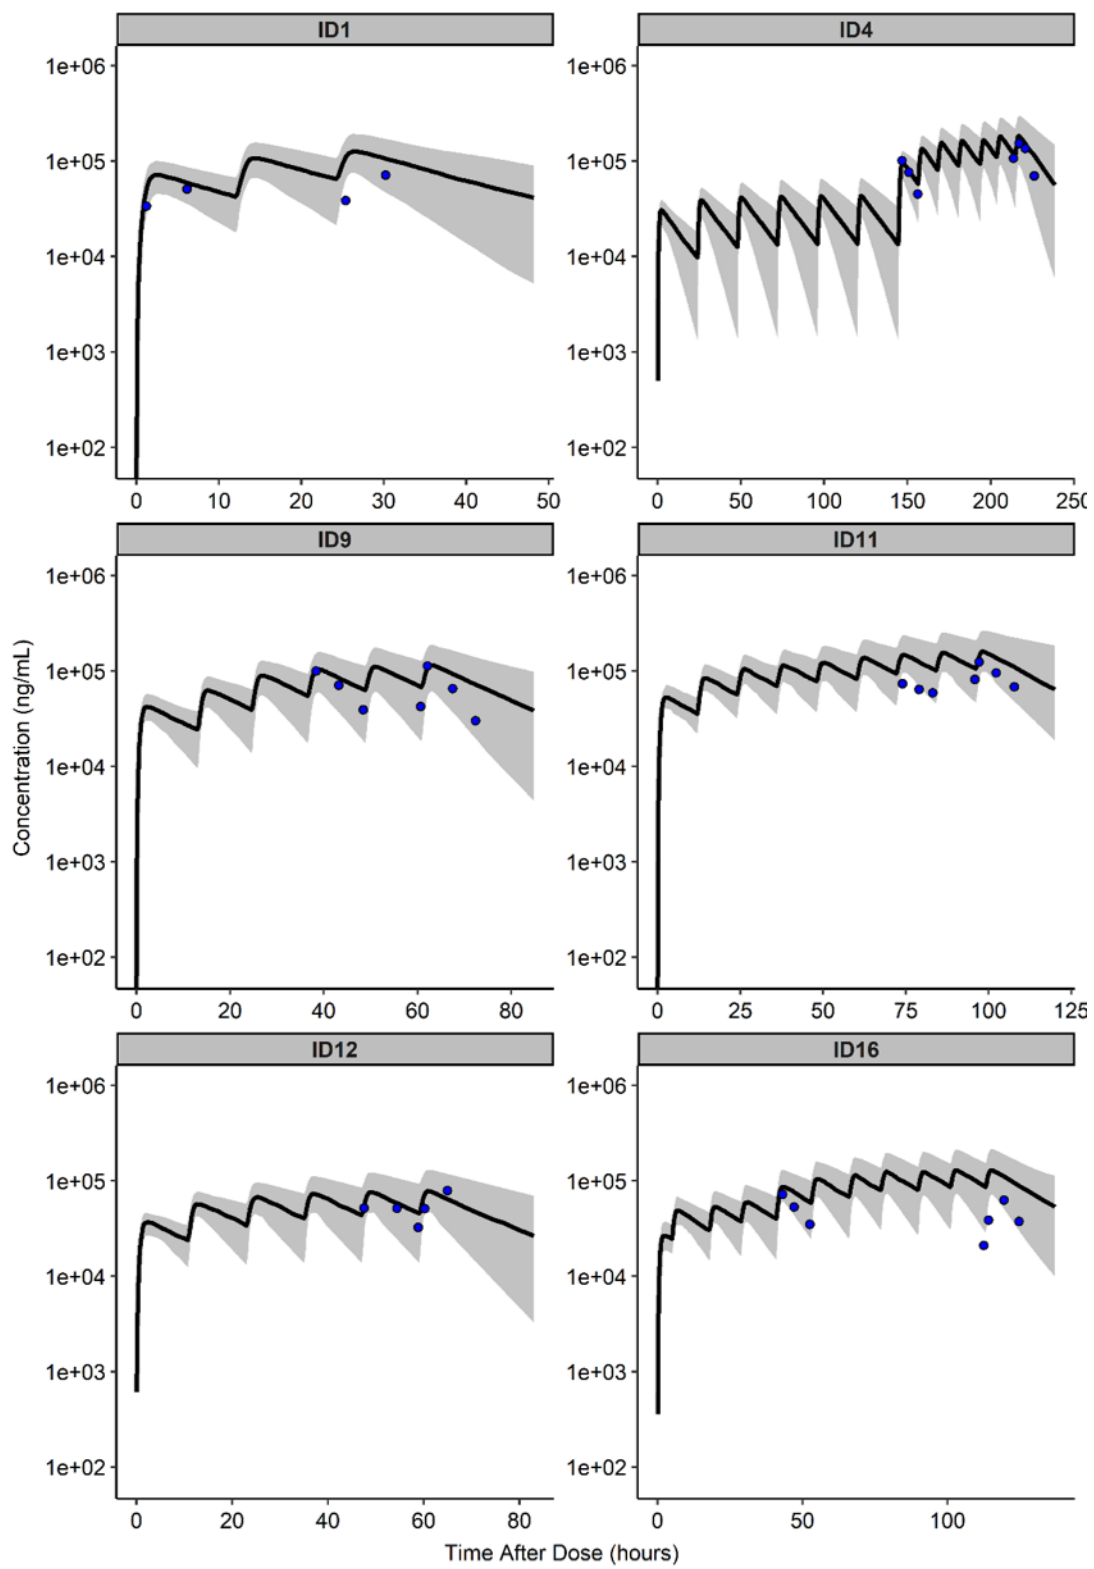



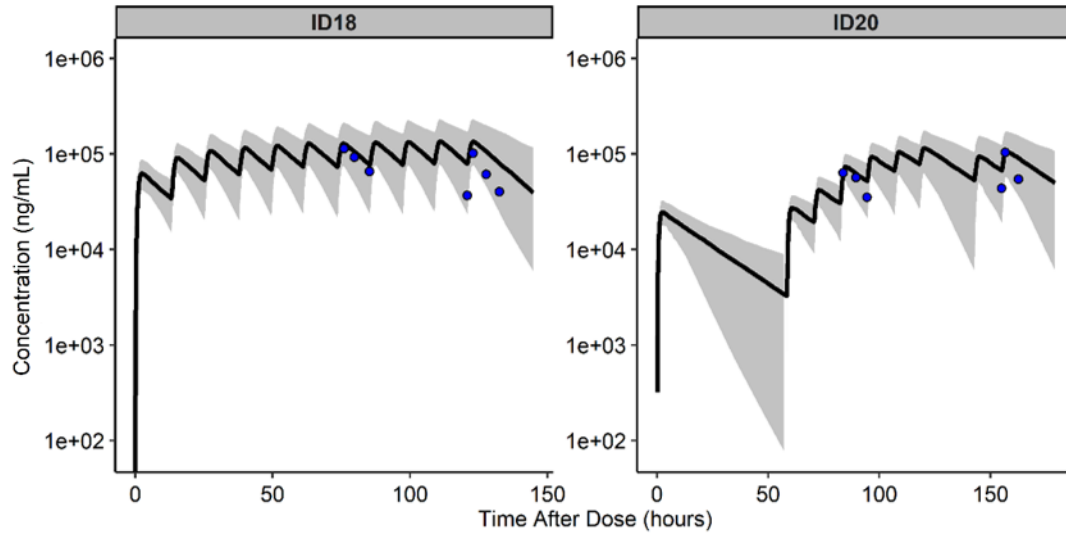

**Supplementary Figure 10.** Population simulations (n=250) of plasma sulfamethoxazole concentration using “individualized populations” for each observed pediatric subject without obesity that are matched to that particular subject’s demographics and dosing regimen. The shaded regions are the 90% model prediction interval, which are overlaid with points representing observed plasma concentrations from the External Data Study.

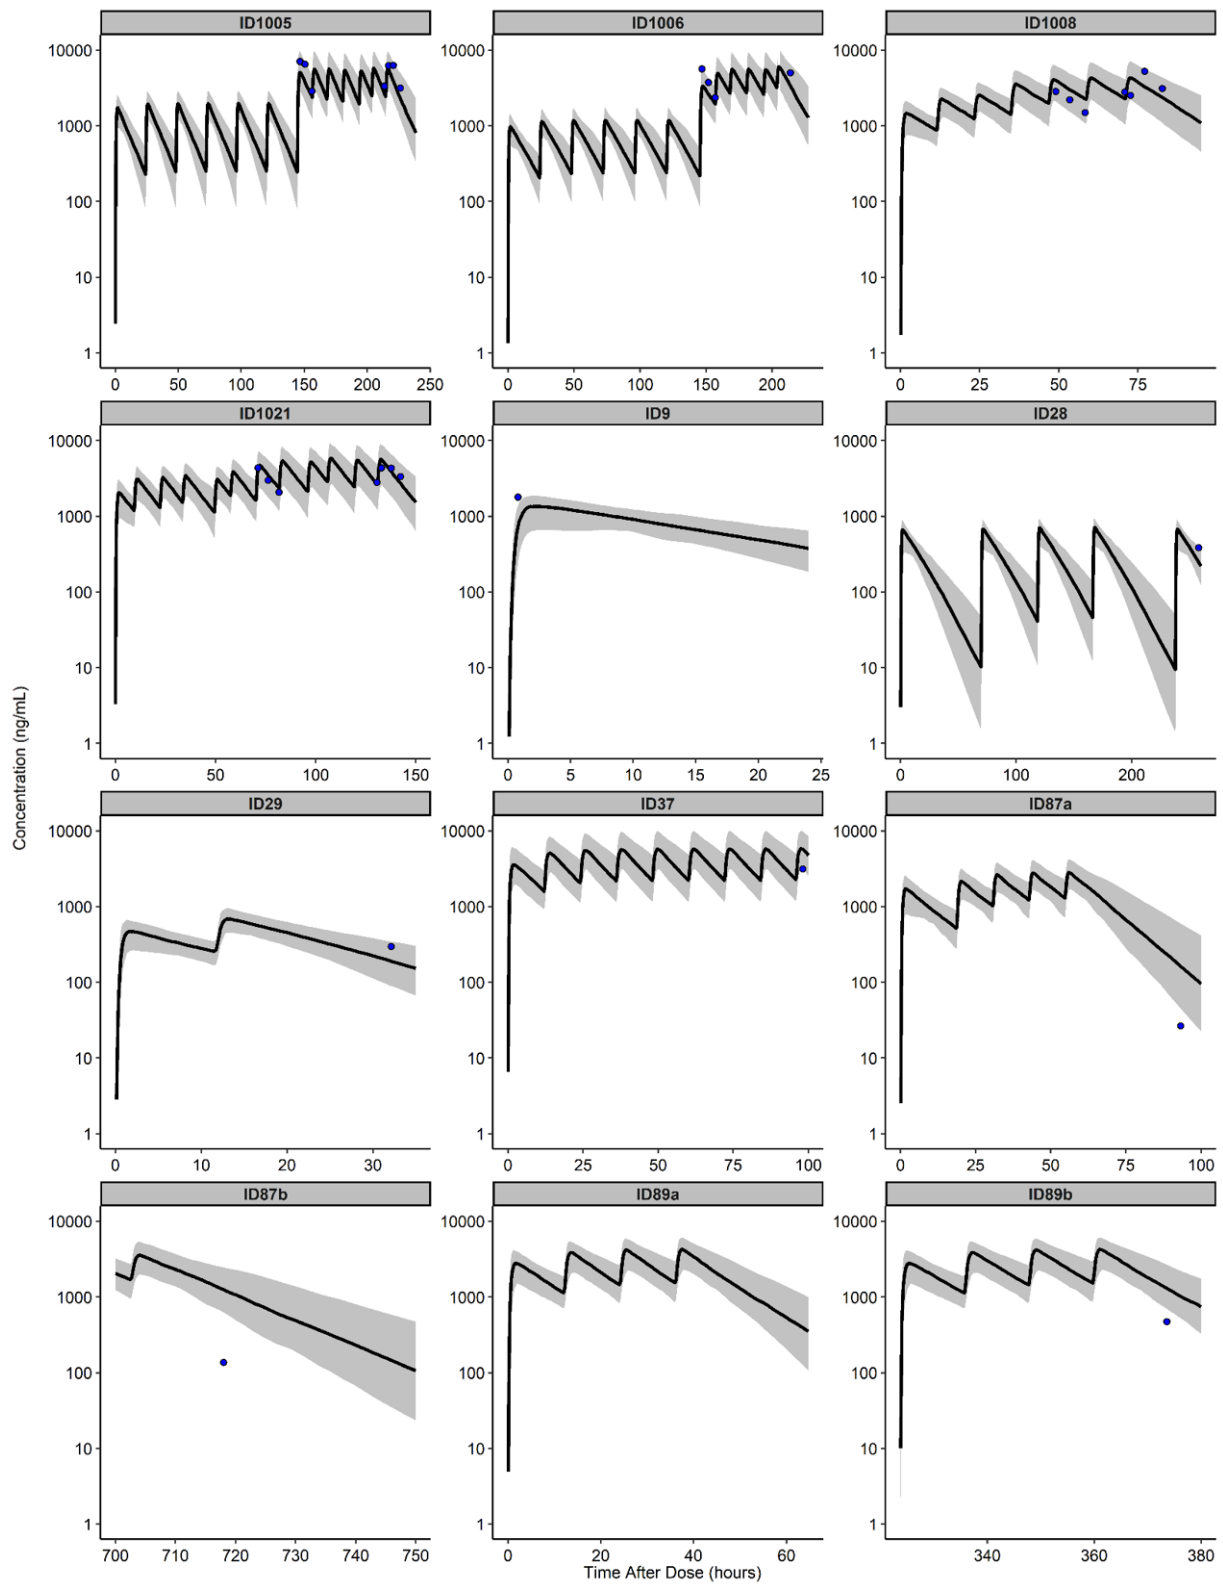

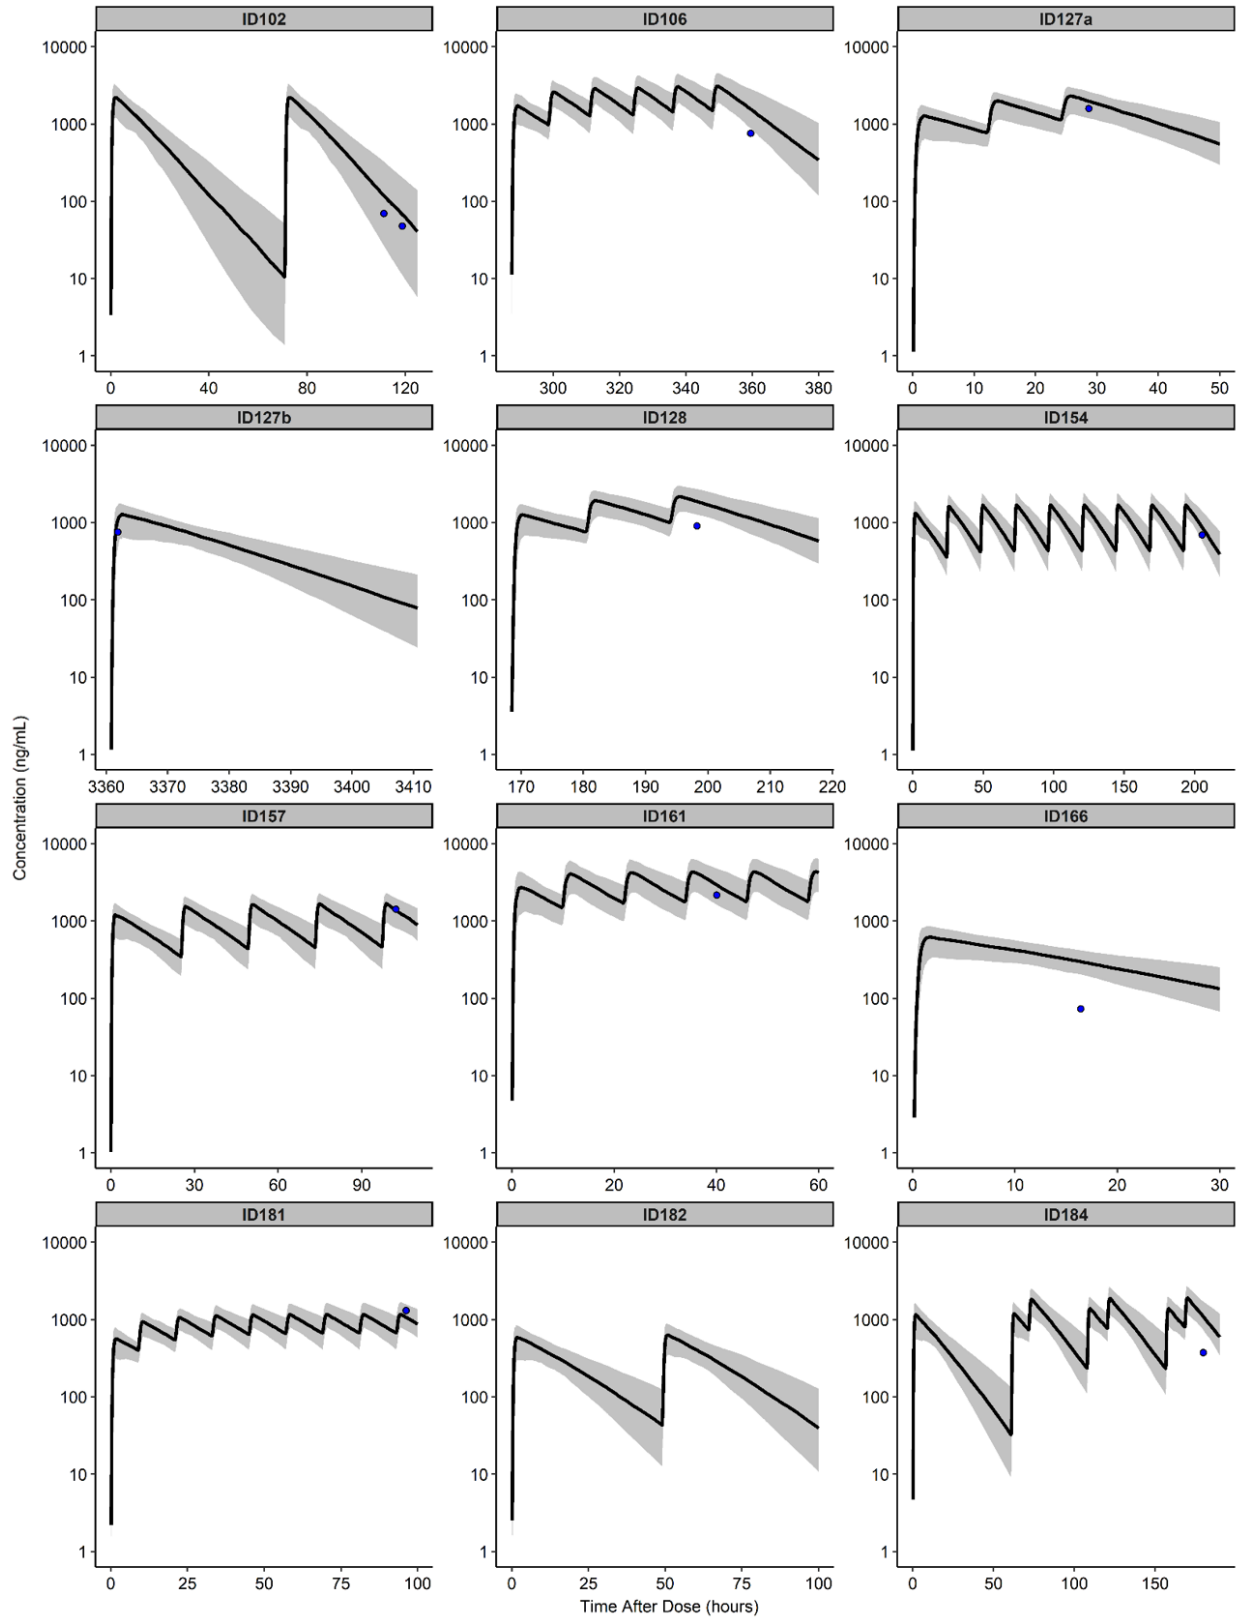

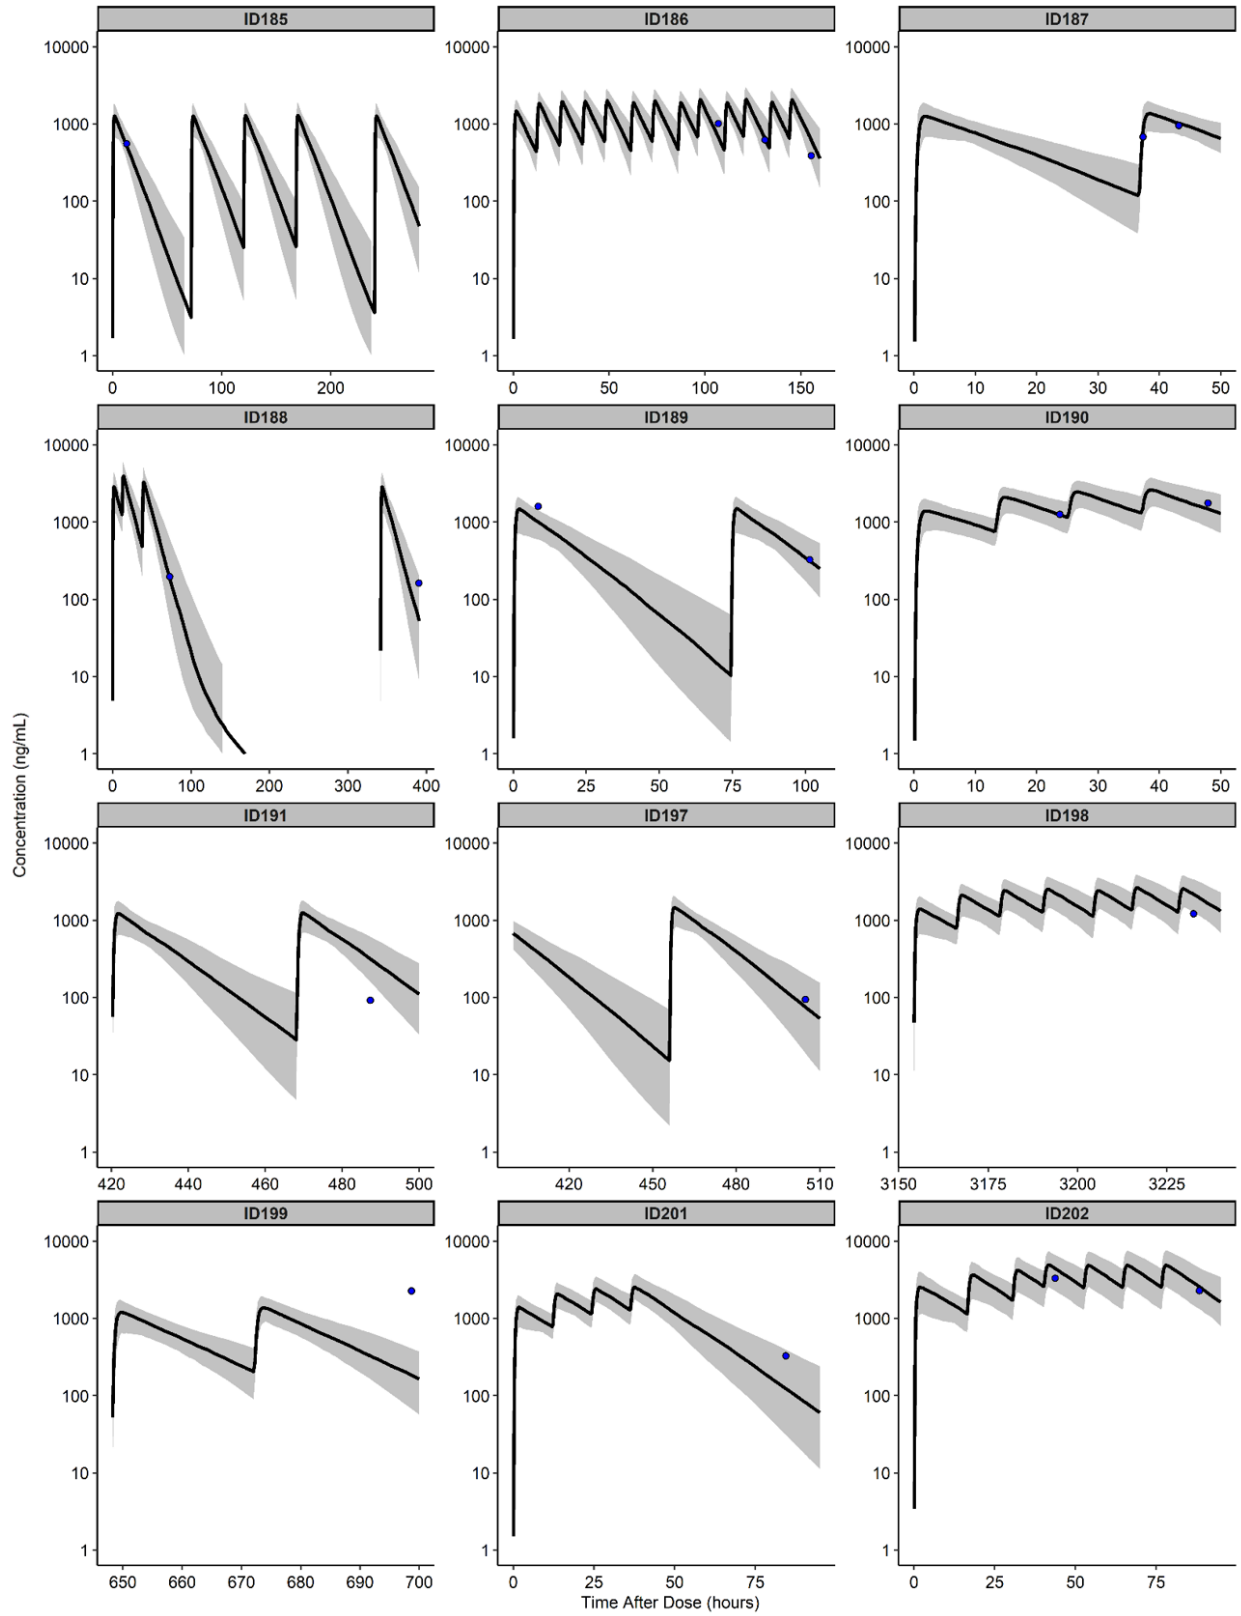

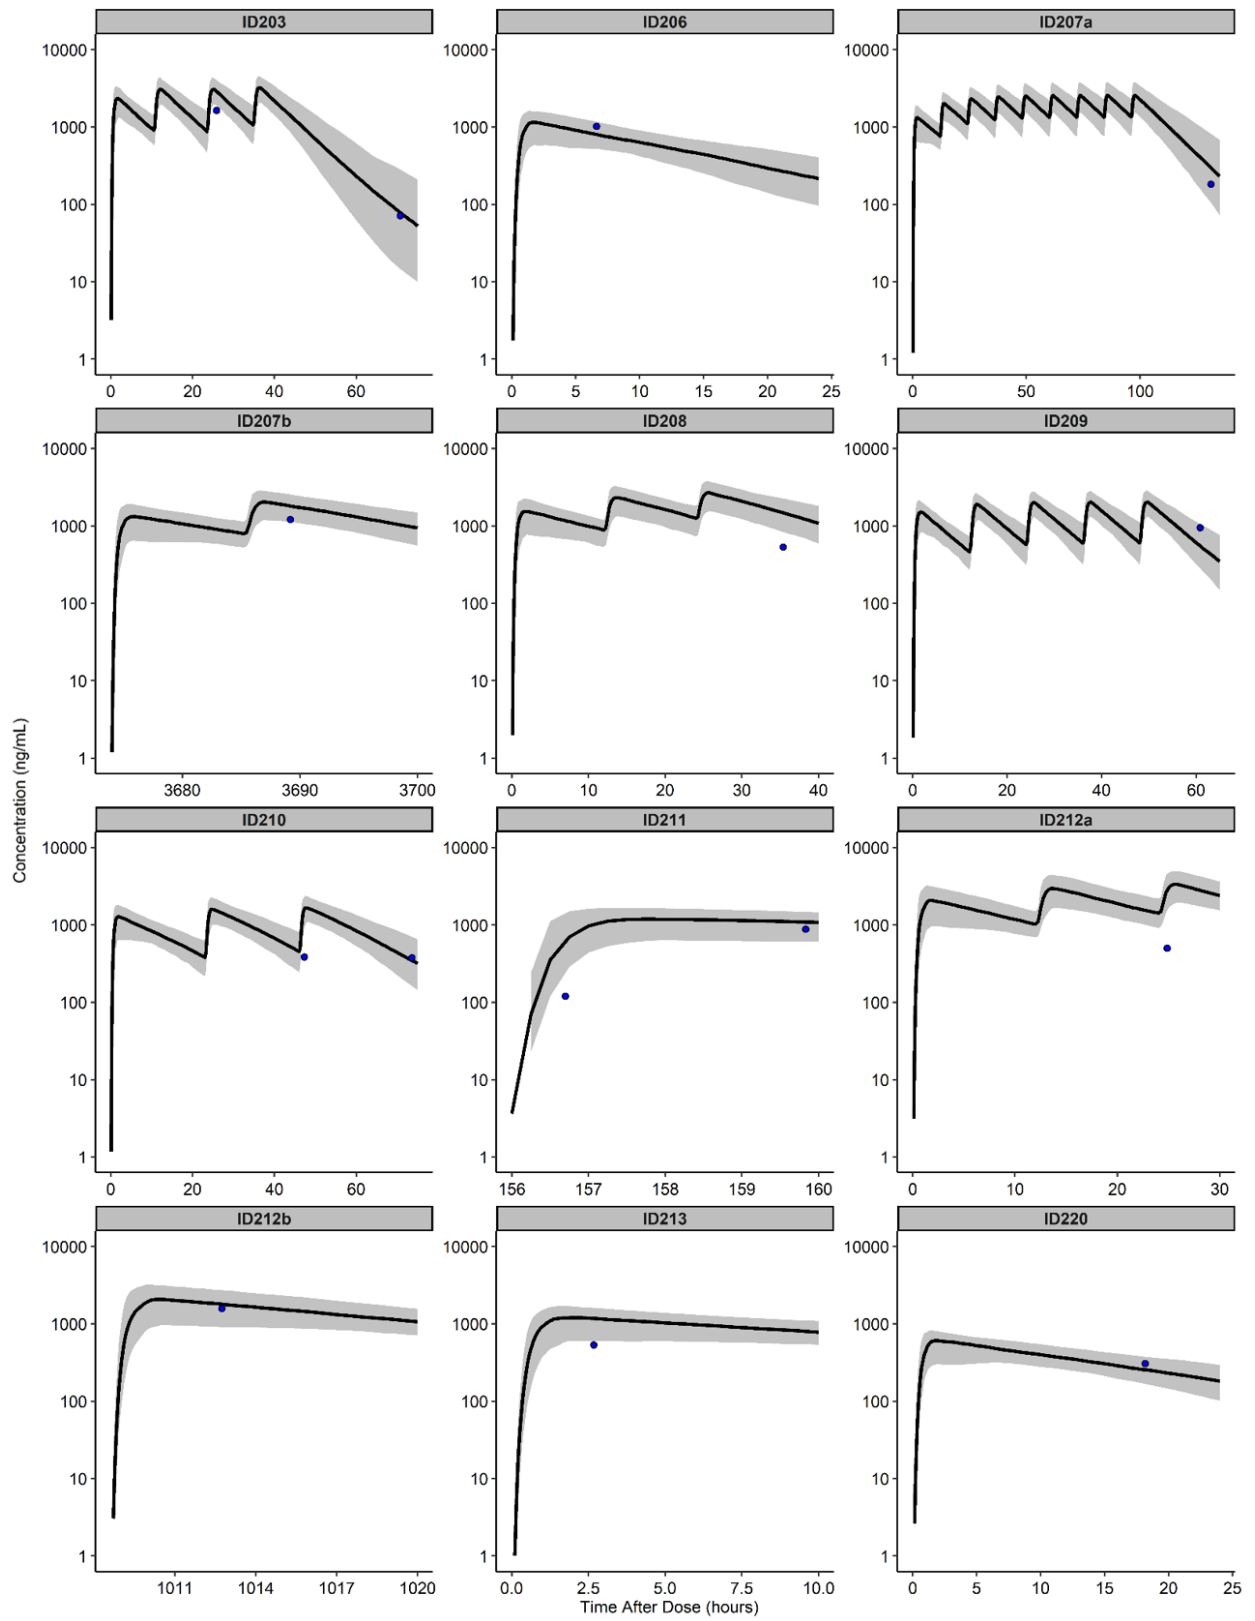

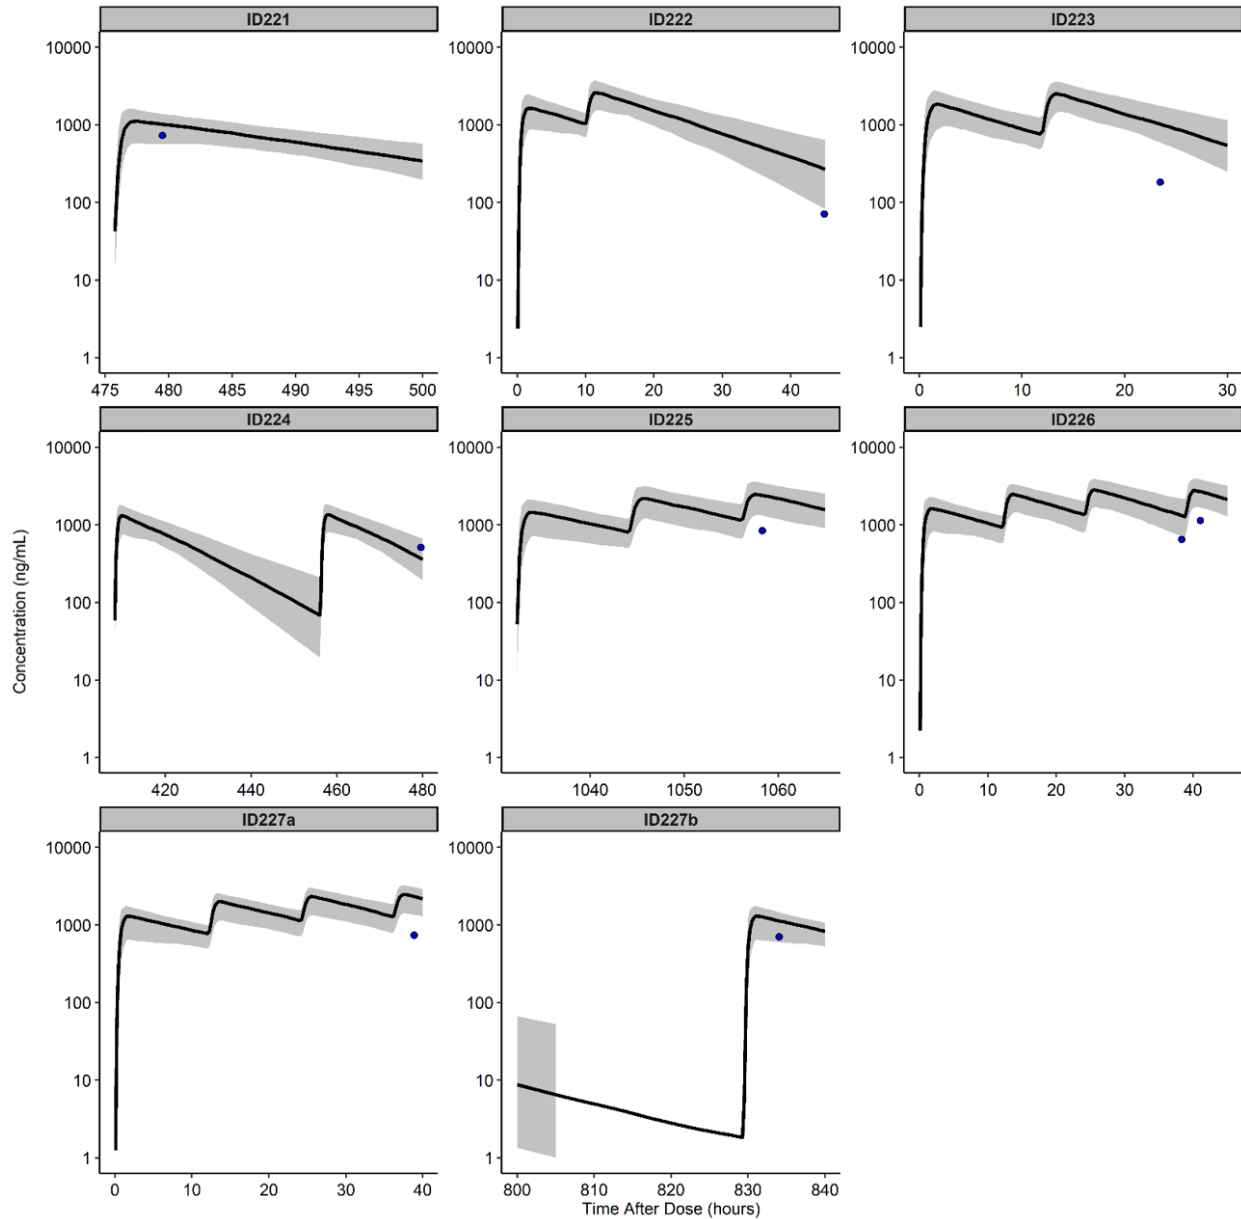

**Supplementary Figure 11.** Population simulations (n=250) of plasma trimethoprim concentration using “individualized populations” for each observed pediatric subject with obesity that are matched to that particular subject’s demographics and dosing regimen. The shaded regions are the 90% model prediction interval, which are overlaid with points representing observed plasma concentrations from the POP01 and External Data Study.

POP01, Pharmacokinetics of Understudied Drugs Administered to Children Per Standard of Care (ClinicalTrials.gov #NCT01431326) Study

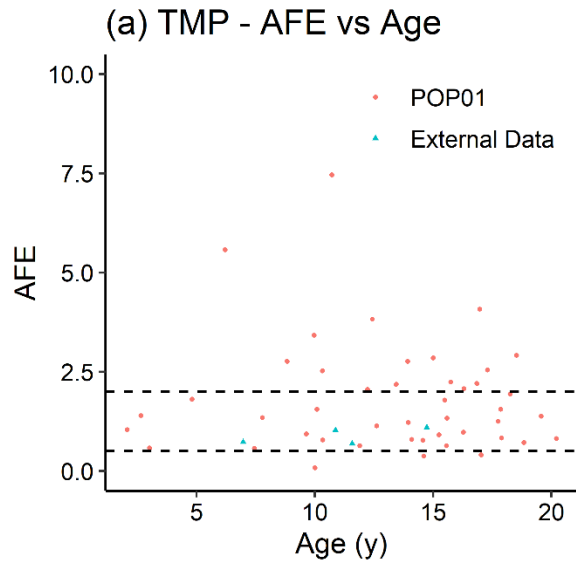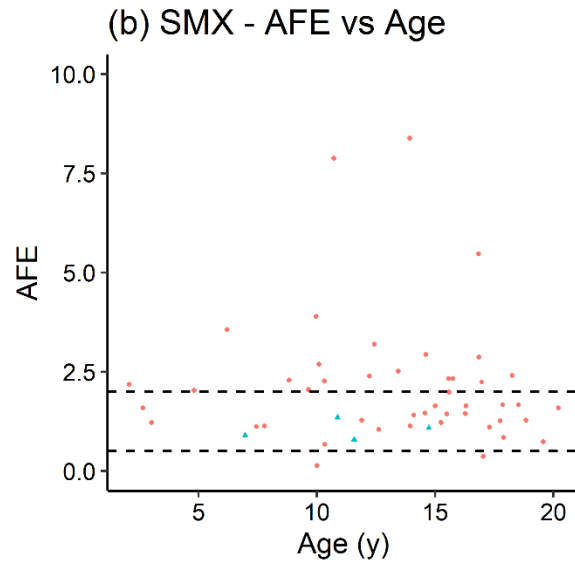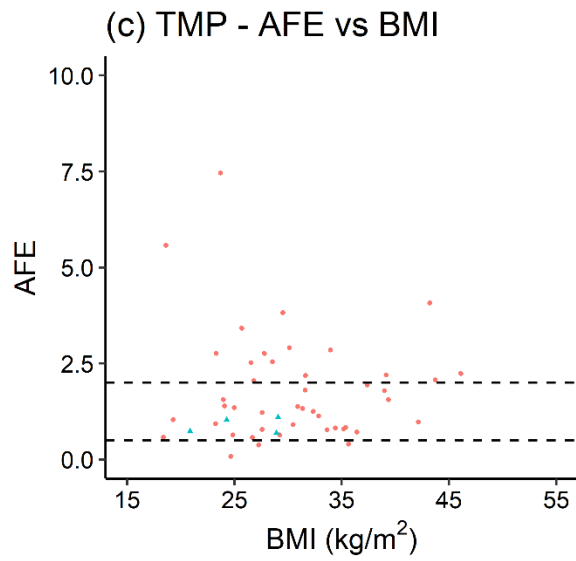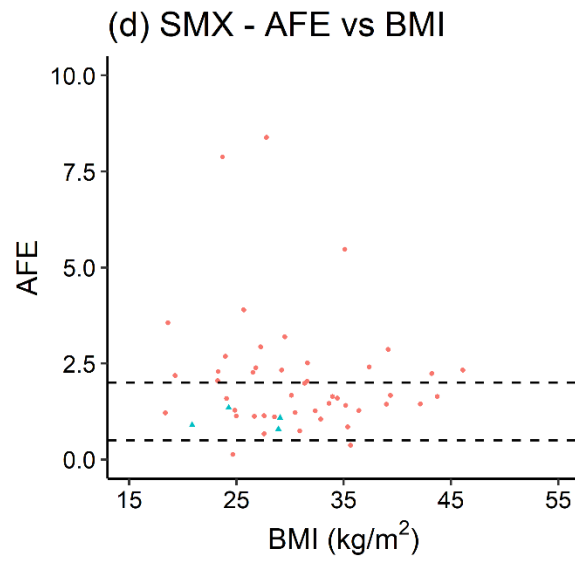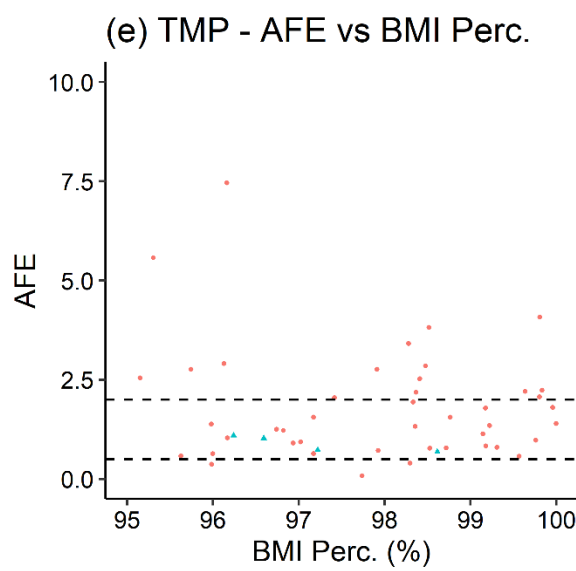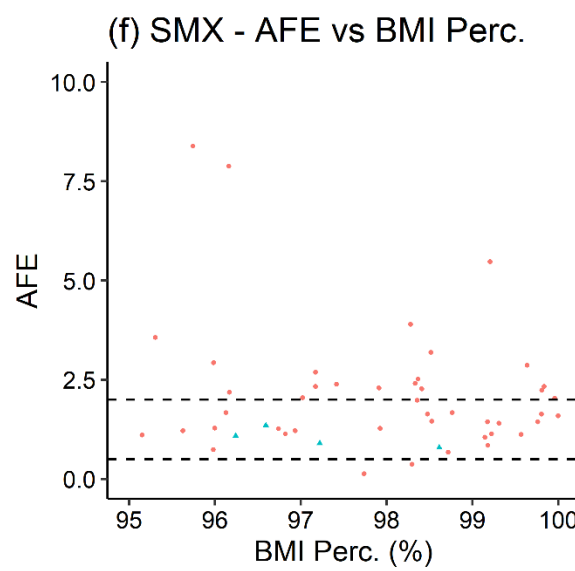

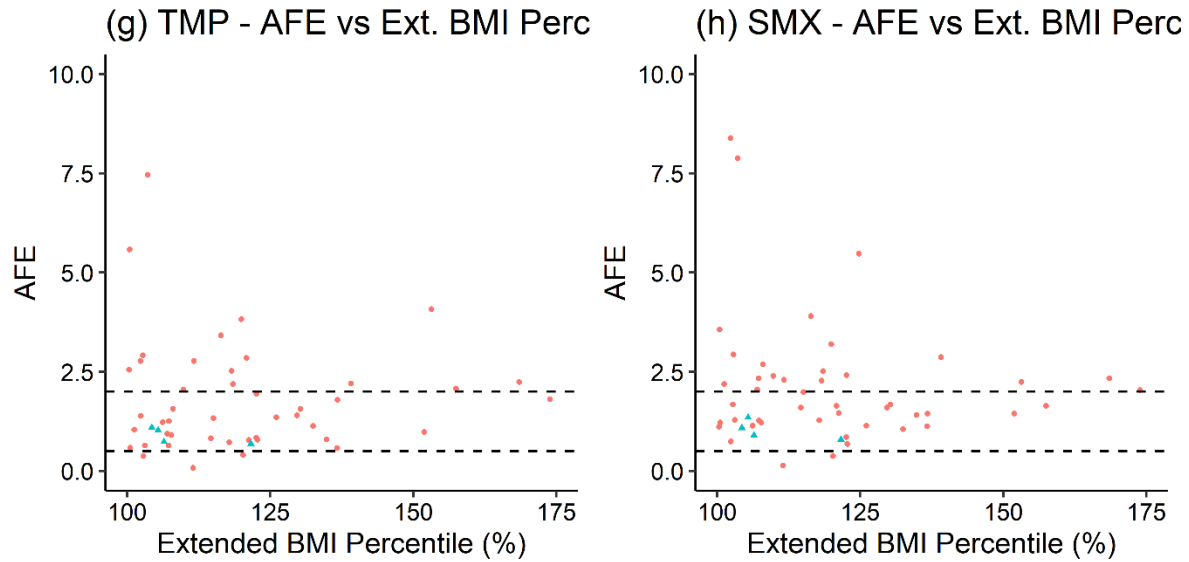

**Supplementary Figure 12.** AFE for pediatric subjects with obesity who received trimethoprim (a, c, e, and g) and sulfamethoxazole (b, d, f, and h) plotted versus age and body size. Dashed lines represent 2-fold error for reference. AFE was calculated using median simulated concentration. Ext. BMI percentile is calculated as BMI divided by the 95<sup>th</sup> BMI percentile for a subject's age and sex, where children with an extended BMI percentile  $\geq 100\%$  are considered obese.

AFE, average fold error; BMI, body mass index; Perc., percentile; Ext., extended; POP01, Pharmacokinetics of Understudied Drugs Administered to Children Per Standard of Care (ClinicalTrials.gov #NCT01431326) Study; SMX, sulfamethoxazole; TMP, trimethoprim



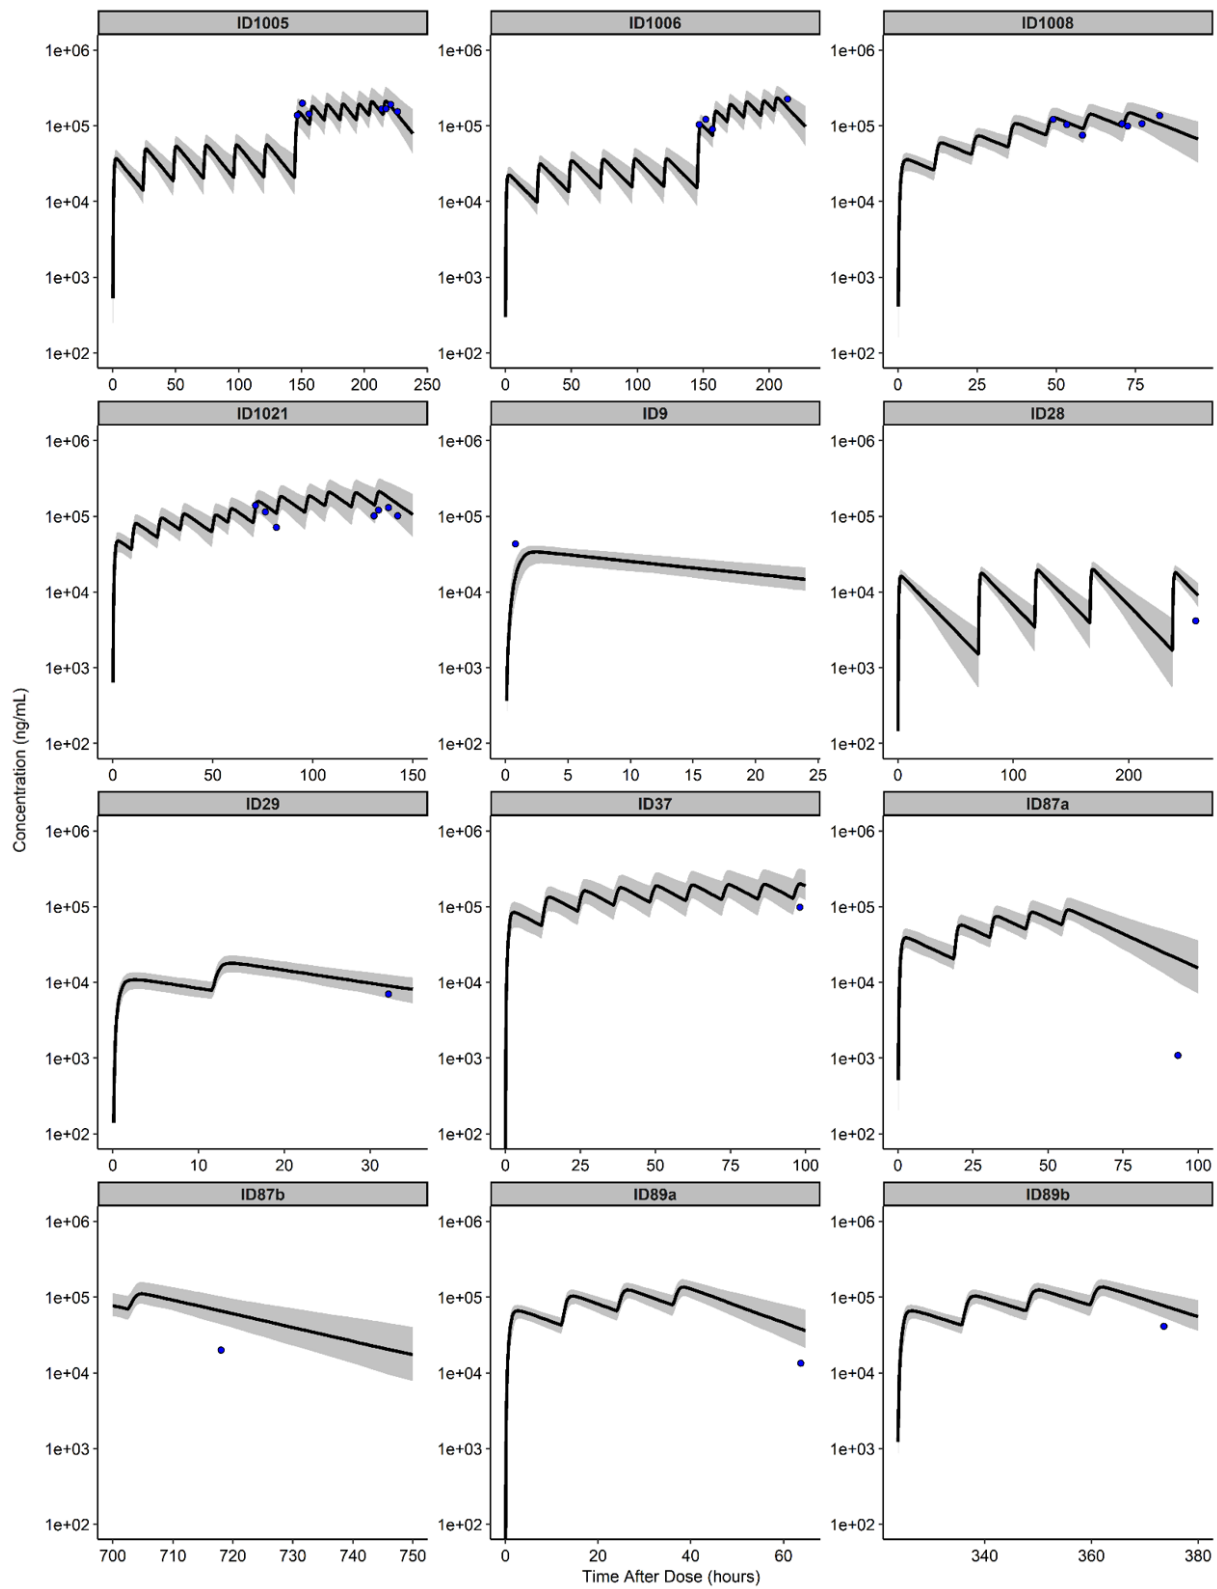

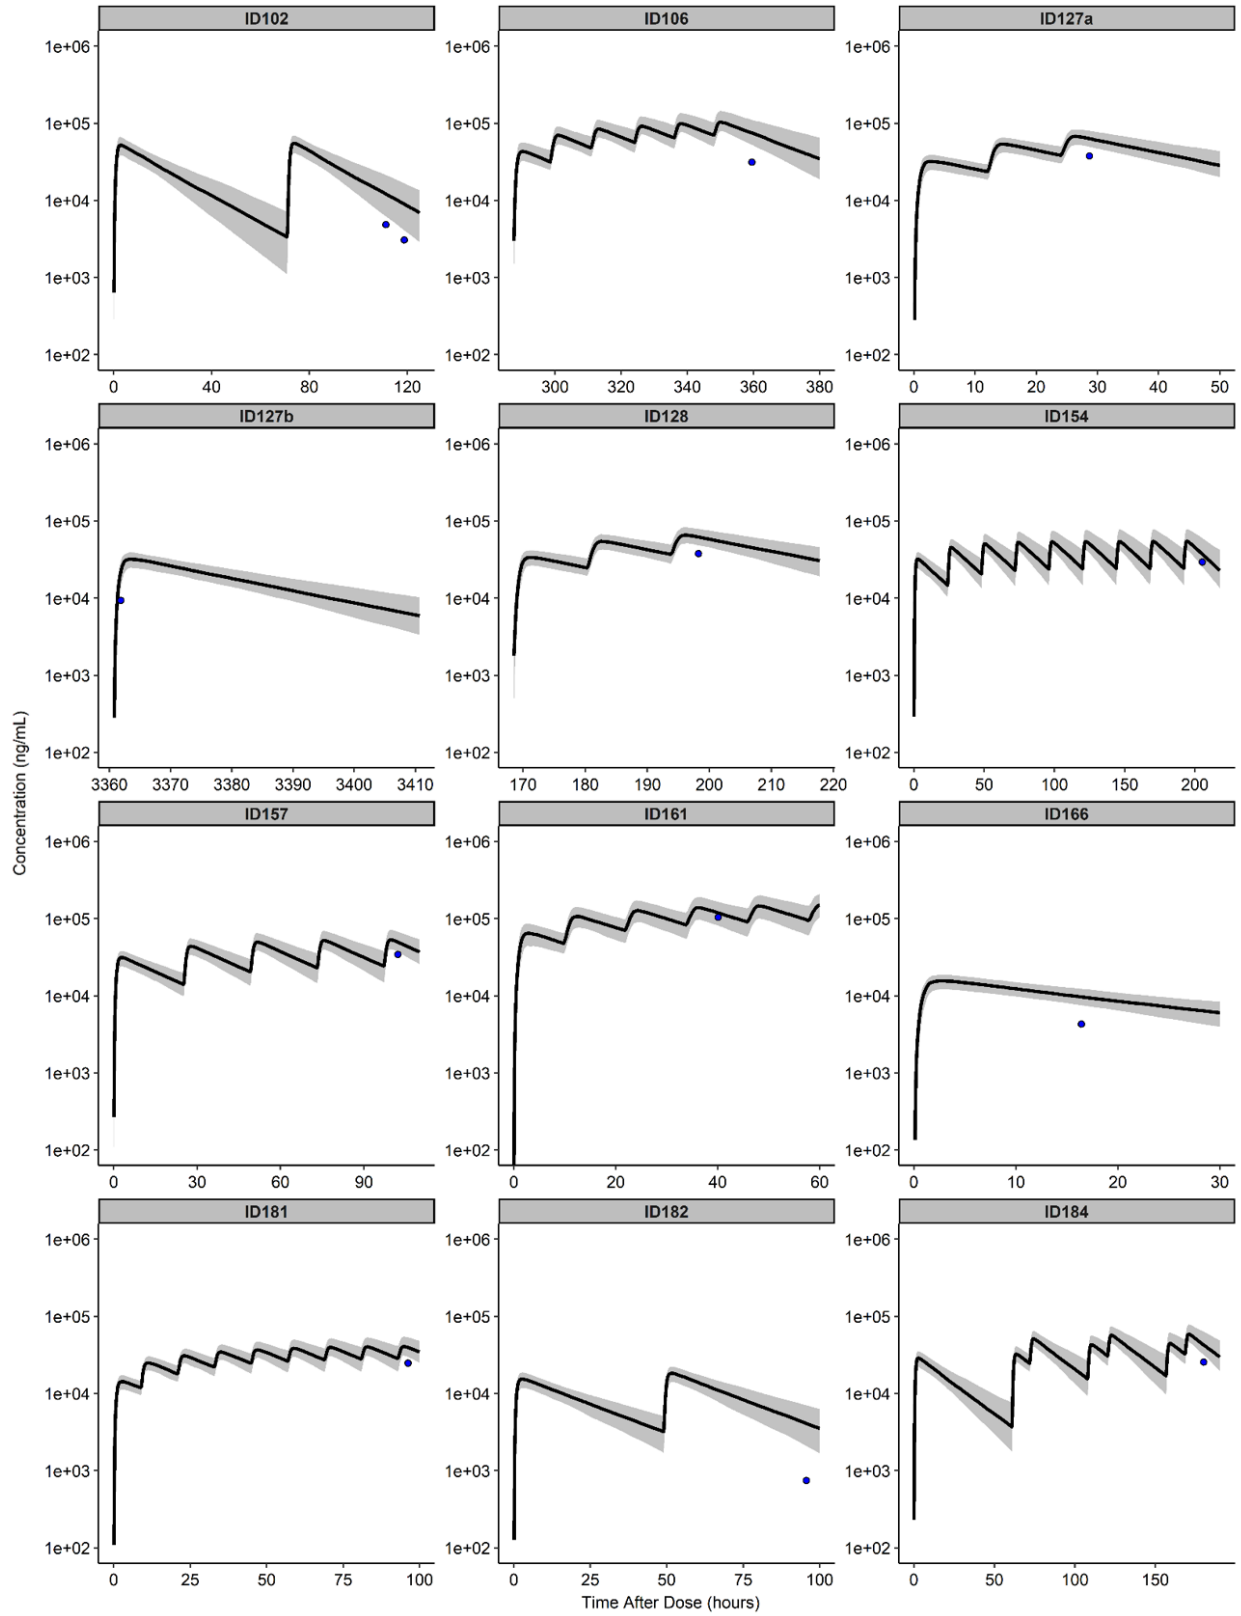

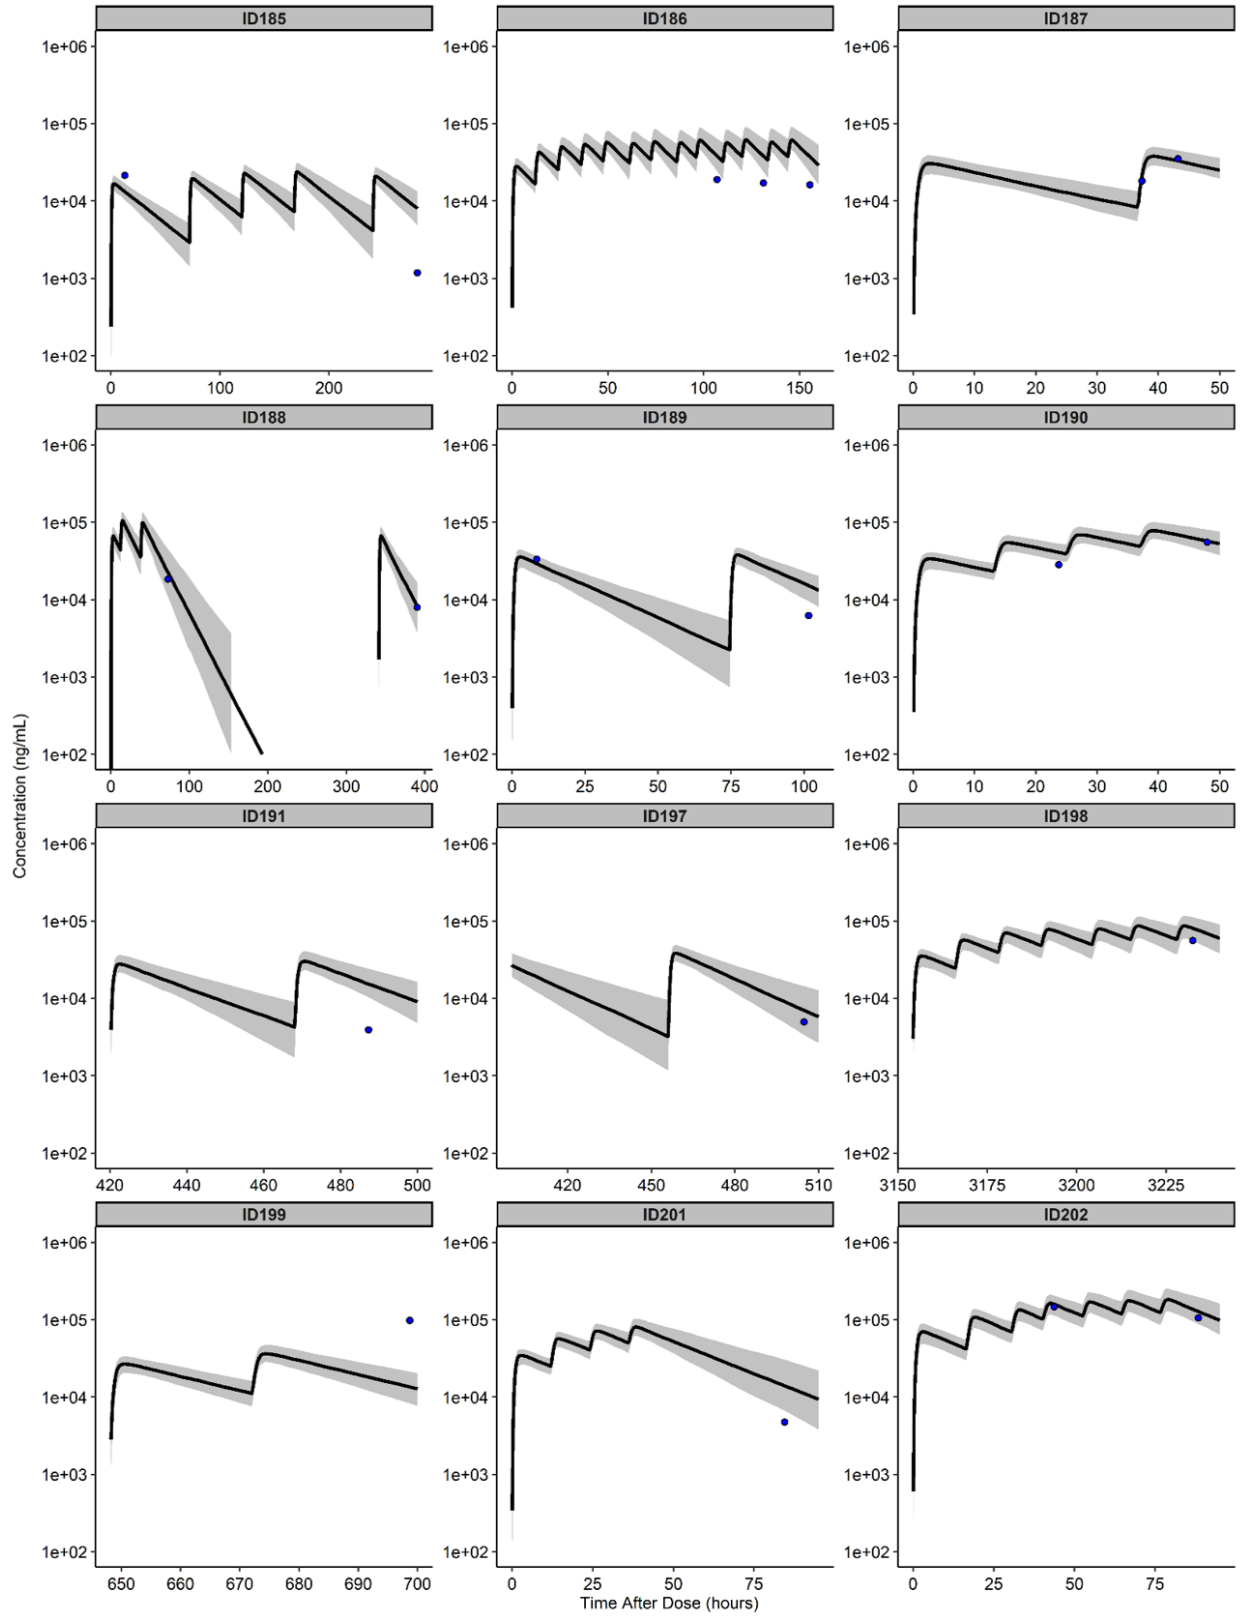

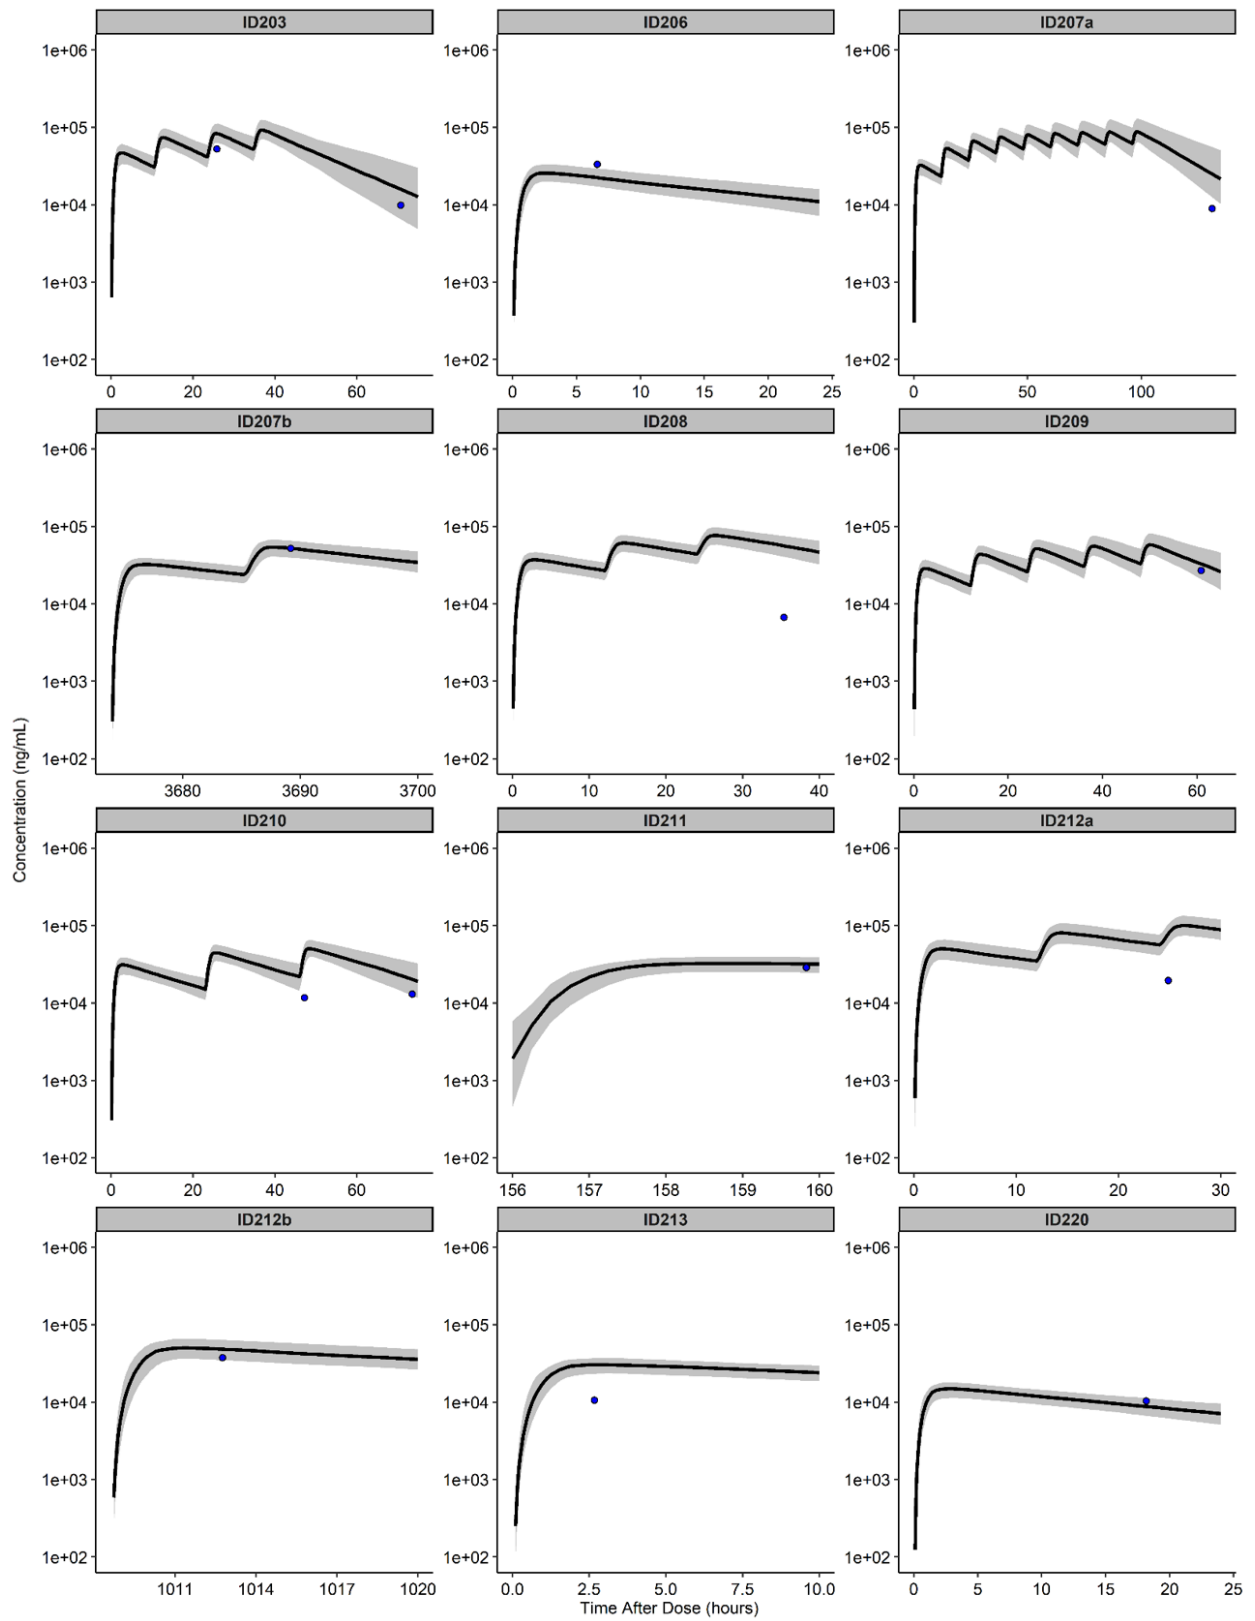

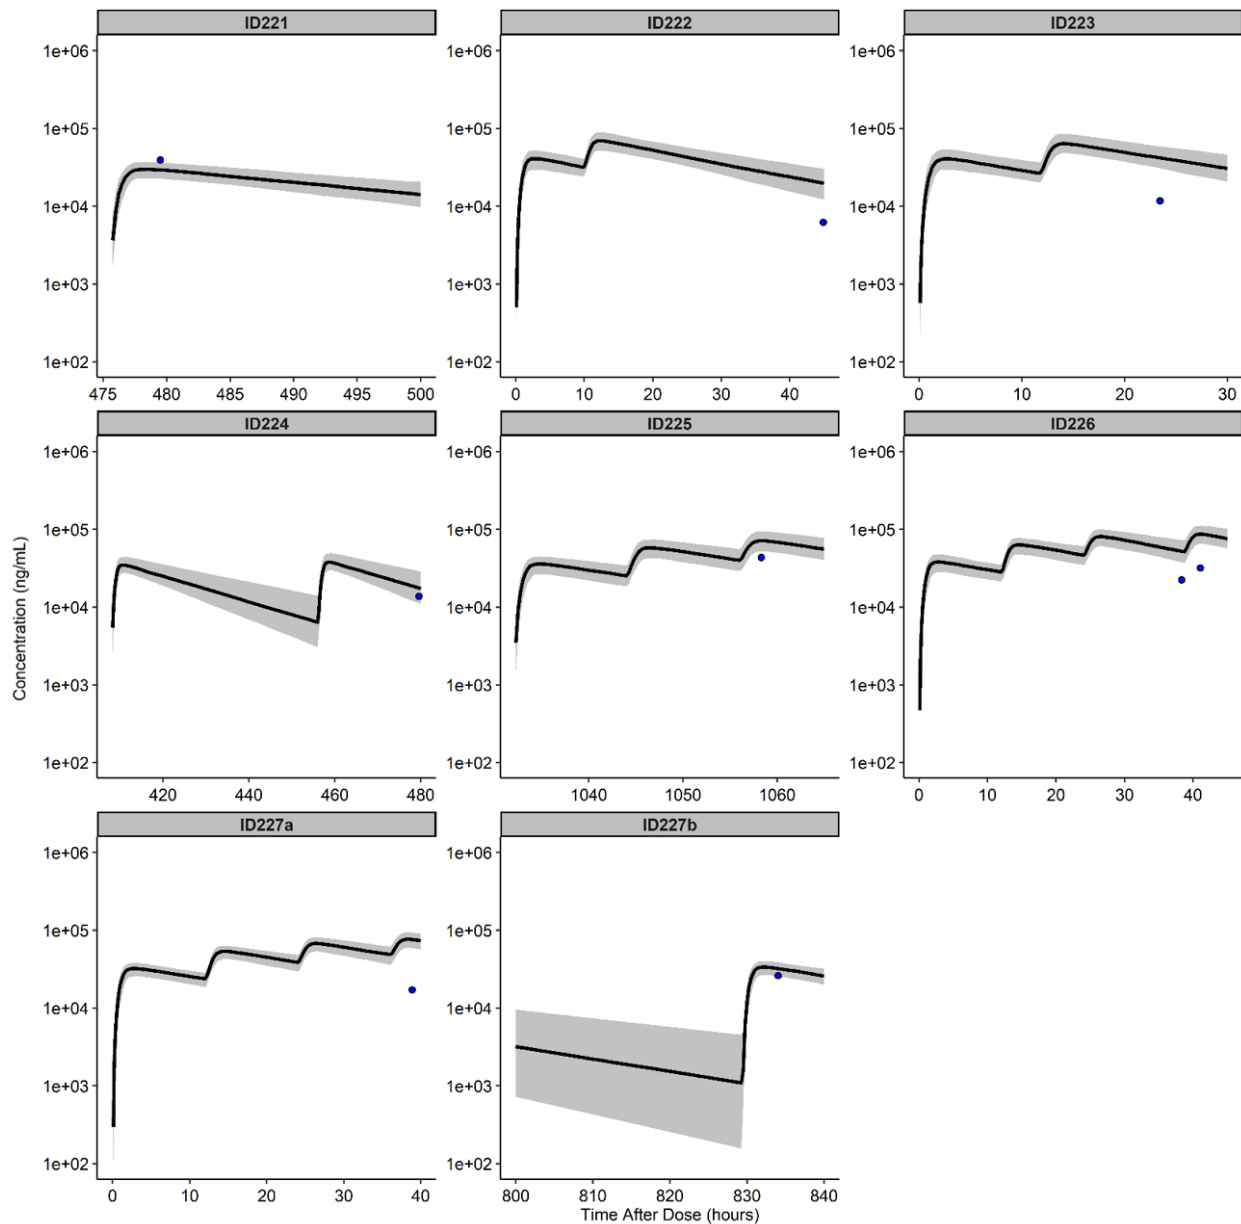

**Supplementary Figure 13.** Population simulations (n=250) of plasma sulfamethoxazole concentration using “individualized populations” for each observed pediatric subject with obesity that are matched to that particular subject’s demographics and dosing regimen. The shaded regions are the 90% model prediction interval, which are overlaid with points representing observed plasma concentrations from the POP01 and External Data Study.

POP01, Pharmacokinetics of Understudied Drugs Administered to Children Per Standard of Care (ClinicalTrials.gov #NCT01431326) Study

(a) CLIN Clearance

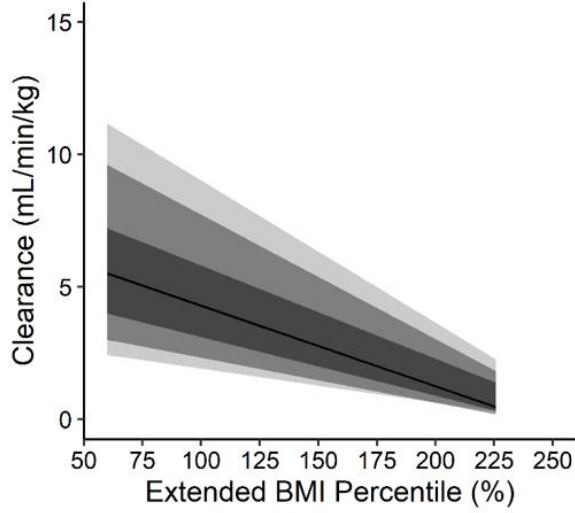

(b) CLIN Volume of Distribution

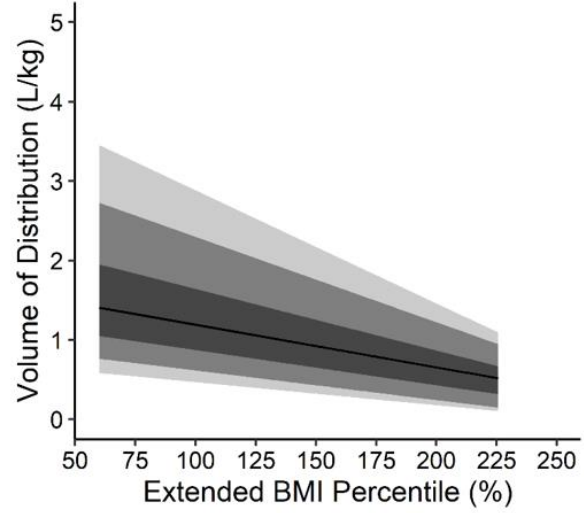

(c) TMP Clearance

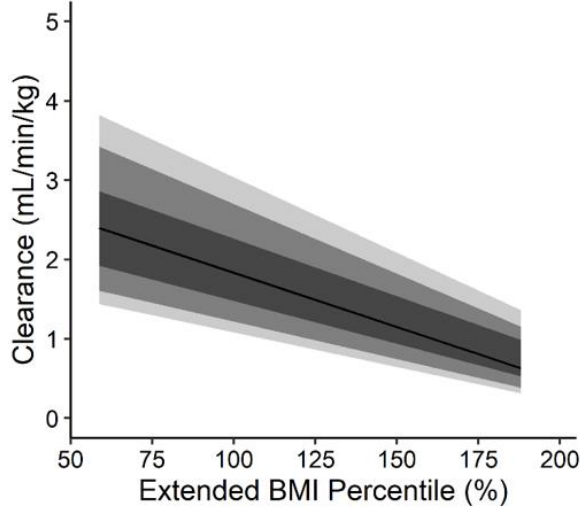

(d) TMP Volume of Distribution

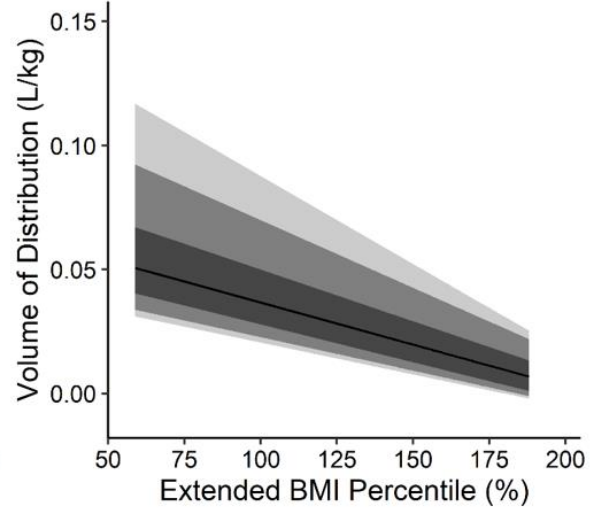

(e) SMX Clearance

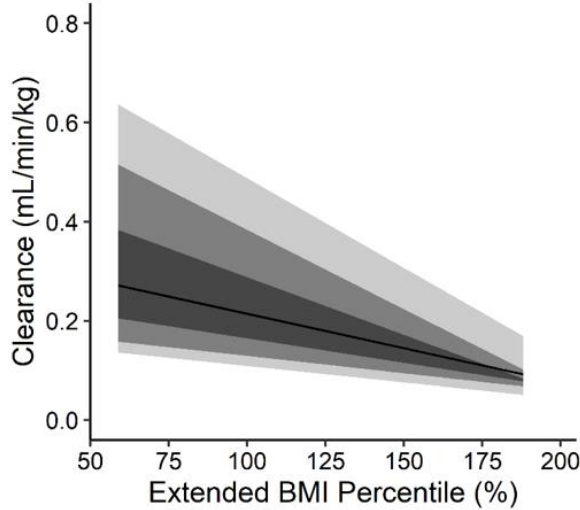

(f) SMX Volume of Distribution

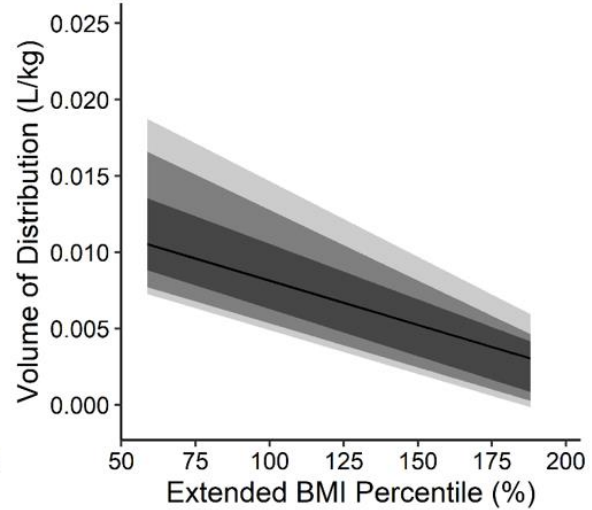

**Supplementary Figure 14.** Changes in simulated weight-normalized clearance (a, c, e) and weight-normalized volume of distribution (b, d, f) for clindamycin (a, b), trimethoprim (c, d), and sulfamethoxazole (e, f) with increasing body size, or extended BMI percentile. Clearance and volume of distribution were calculated from virtual children aged 6 – 12 years with and without obesity. Extended BMI percentile is calculated as BMI divided by the 95<sup>th</sup> BMI percentile for a subject's age and sex, where children with an extended BMI percentile  $\geq 100\%$  are considered obese. Virtual children received single doses of 600 mg IV infusion (30 min) clindamycin, 160 mg PO trimethoprim, and 800 mg PO sulfamethoxazole. The shaded regions denote the 90% (95<sup>th</sup> and 5<sup>th</sup> percentiles), 80% (90<sup>th</sup> and 10<sup>th</sup> percentiles), and 50% (75<sup>th</sup> and 25<sup>th</sup> percentiles) prediction intervals from lightest to darkest color intensity, respectively. The black line denotes the median. Note that variability in PK parameters appears decreased at the upper extremity of extended BMI percentile due to a lower number of virtual subjects in this range.

BMI, body mass index; CLIN, clindamycin; IV, intravenous; PO, oral dose; SMX, sulfamethoxazole; TMP, trimethoprim

(a) CLIN Clearance

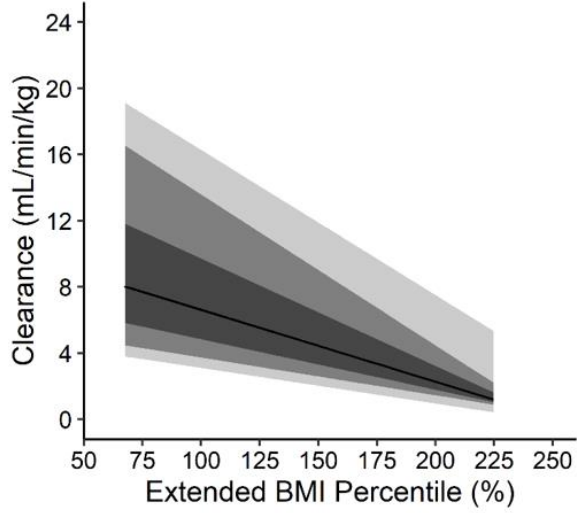

(b) CLIN Volume of Distribution

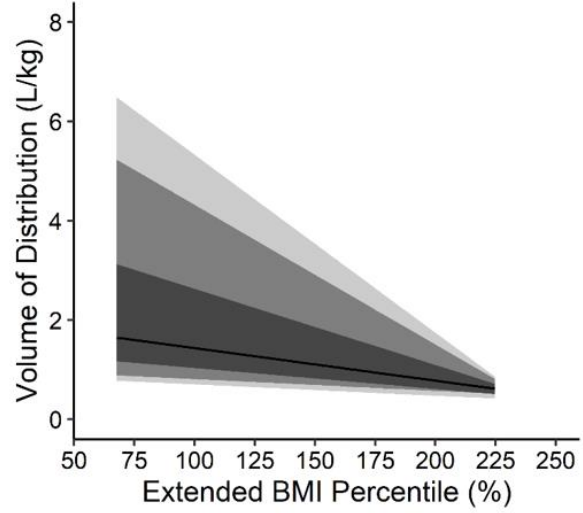

(c) TMP Clearance

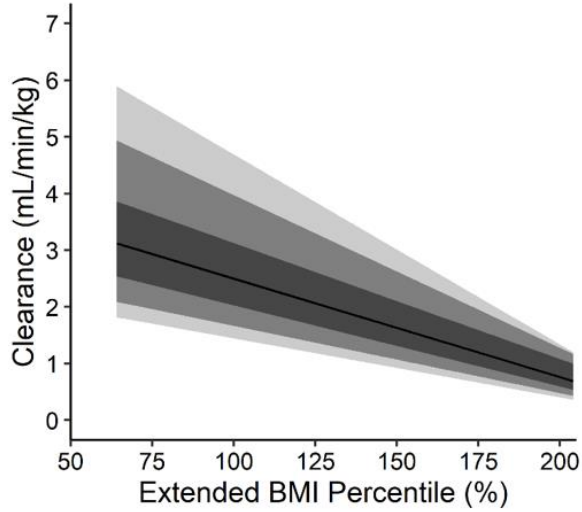

(d) TMP Volume of Distribution

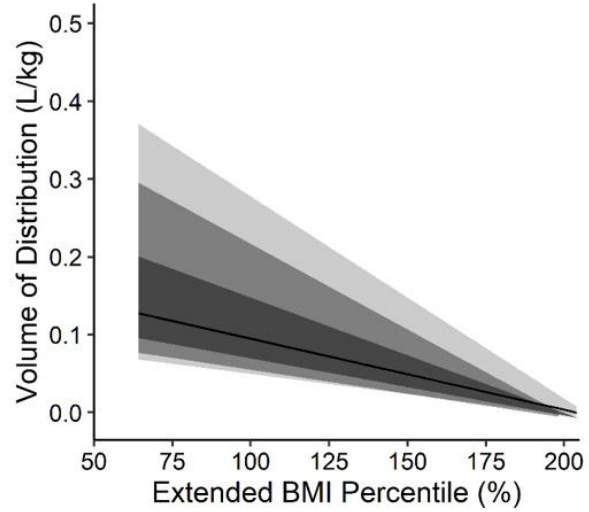

(e) SMX Clearance

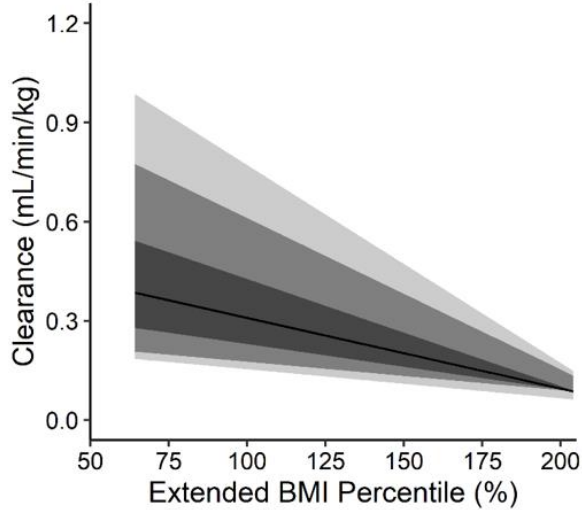

(f) SMX Volume of Distribution

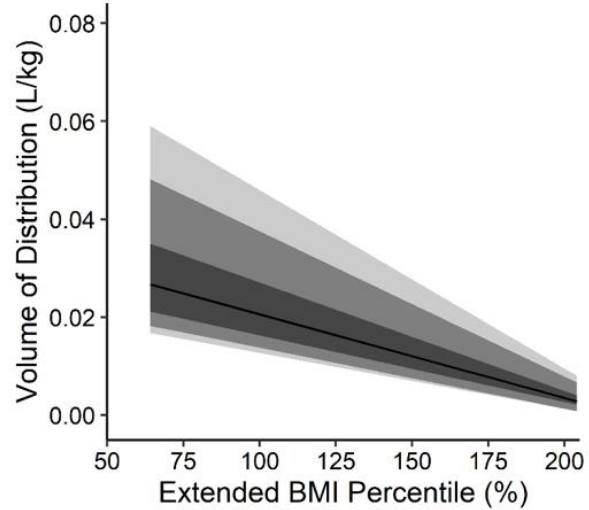



**Supplementary Figure 15.** Changes in simulated weight-normalized clearance (a, c, e) and weight-normalized volume of distribution (b, d, f) for clindamycin (a, b), trimethoprim (c, d), and sulfamethoxazole (e, f) with increasing body size, or extended BMI percentile. Clearance and volume of distribution were calculated from virtual children aged 2 – 6 years with and without obesity. Extended BMI percentile is calculated as BMI divided by the 95<sup>th</sup> BMI percentile for a subject's age and sex, where children with an extended BMI percentile  $\geq 100\%$  are considered obese. Virtual children received single doses of 600 mg IV infusion (30 min) clindamycin, 160 mg PO trimethoprim, and 800 mg PO sulfamethoxazole. The shaded regions denote the 90% (95<sup>th</sup> and 5<sup>th</sup> percentiles), 80% (90<sup>th</sup> and 10<sup>th</sup> percentiles), and 50% (75<sup>th</sup> and 25<sup>th</sup> percentiles) prediction intervals from lightest to darkest color intensity, respectively. The black line denotes the median. Note that variability in PK parameters appears decreased at the upper extremity of extended BMI percentile due to a lower number of virtual subjects in this range.

BMI, body mass index; CLIN, clindamycin; IV, intravenous; PO, oral dose; SMX, sulfamethoxazole; TMP, trimethoprim

(a) CLIN Clearance

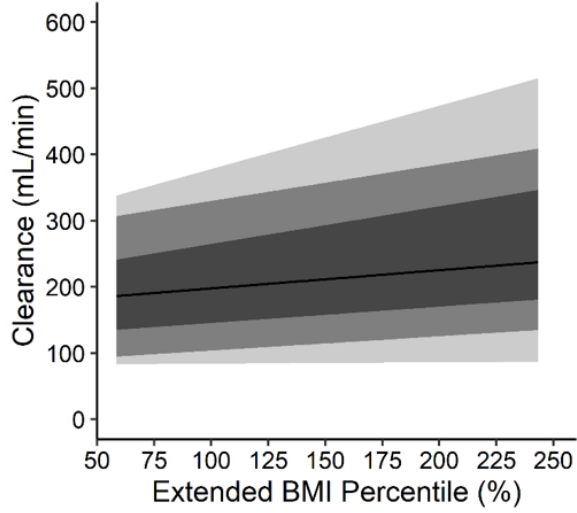

(b) CLIN Volume of Distribution

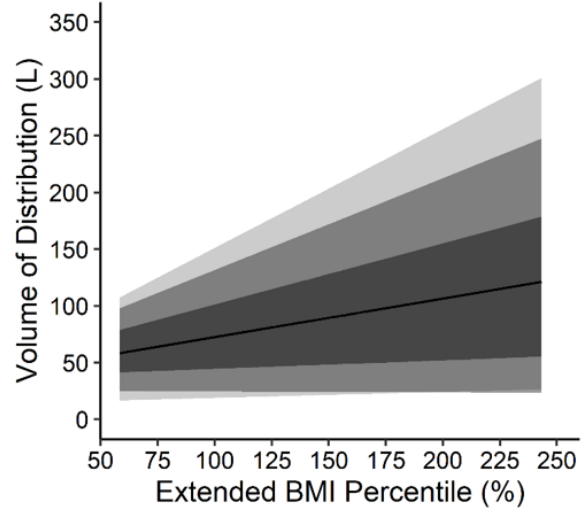

(c) TMP Clearance

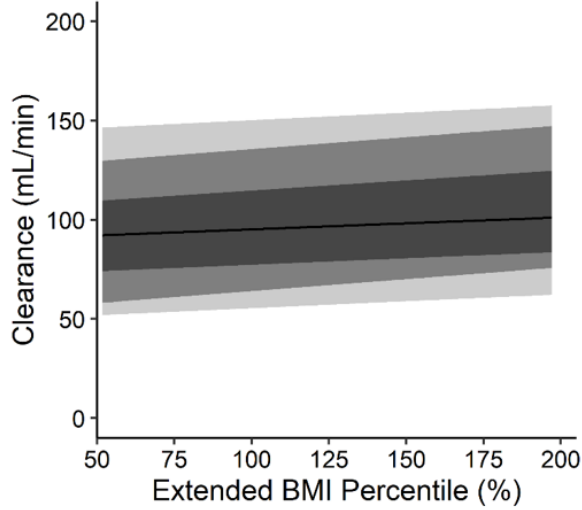

(d) TMP Volume of Distribution

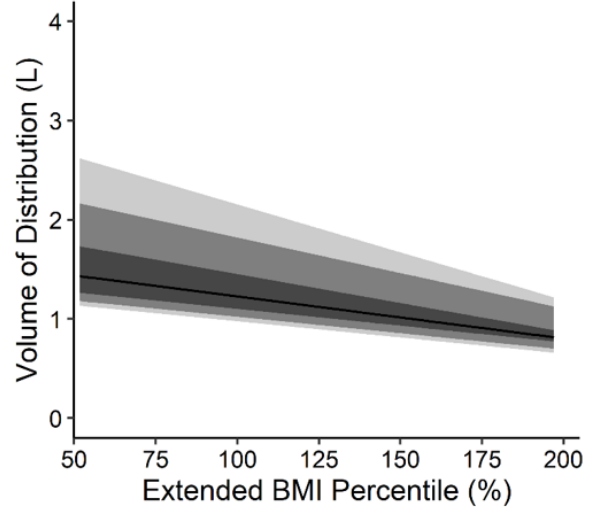

(e) SMX Clearance

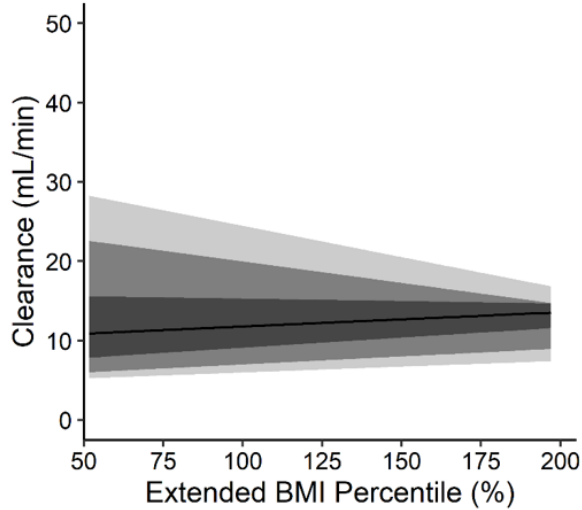

(f) SMX Volume of Distribution

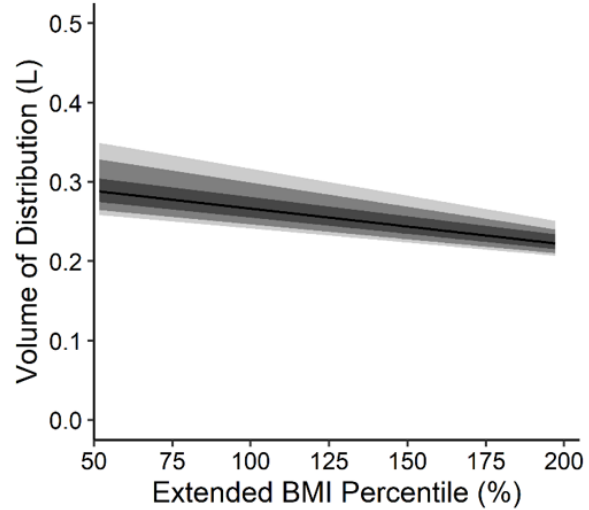

**Supplementary Figure 16.** Changes in simulated absolute clearance (a, c, e) and volume of distribution (b, d, f) for clindamycin (a, b), trimethoprim (c, d), and sulfamethoxazole (e, f) with increasing body size, or extended BMI percentile. Clearance and volume of distribution were calculated from virtual children aged 12 – 18 years with and without obesity. Extended BMI percentile is calculated as BMI divided by the 95<sup>th</sup> BMI percentile for a subject's age and sex, where children with an extended BMI percentile  $\geq 100\%$  are considered obese. Virtual children received single doses of 600 mg IV infusion (30 min) clindamycin, 160 mg PO trimethoprim, and 800 mg PO sulfamethoxazole. The shaded regions denote the 90% (95<sup>th</sup> and 5<sup>th</sup> percentiles), 80% (90<sup>th</sup> and 10<sup>th</sup> percentiles), and 50% (75<sup>th</sup> and 25<sup>th</sup> percentiles) prediction intervals from lightest to darkest color intensity, respectively. The black line denotes the median. Note that variability in PK parameters appears decreased at the upper extremity of extended BMI percentile due to a lower number of virtual subjects in this range.

BMI, body mass index; CLIN, clindamycin; IV, intravenous; PO, oral dose; SMX, sulfamethoxazole; TMP, trimethoprim

(a) CLIN Clearance

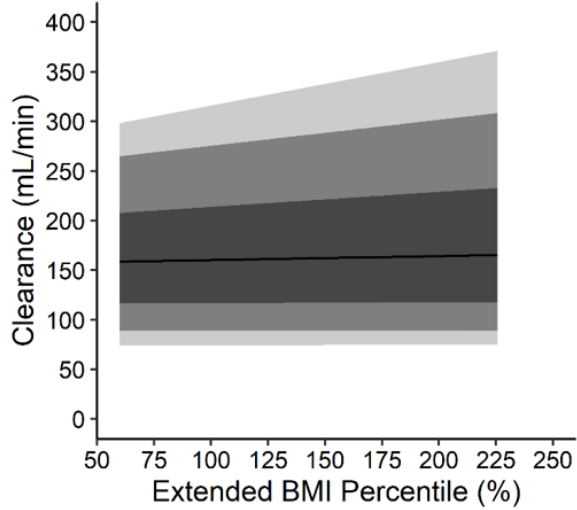

(b) CLIN Volume of Distribution

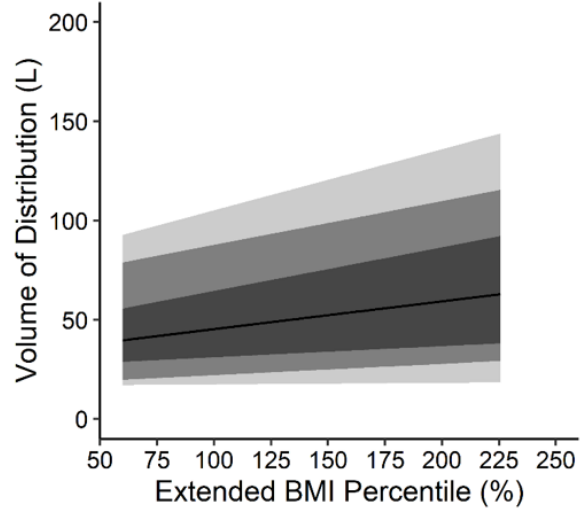

(c) TMP Clearance

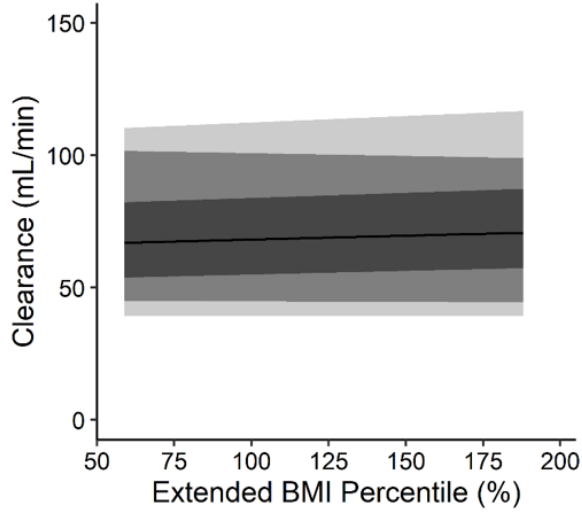

(d) TMP Volume of Distribution

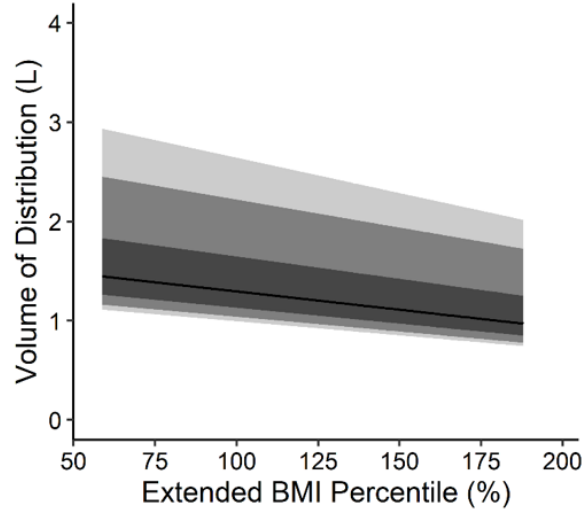

(e) SMX Clearance

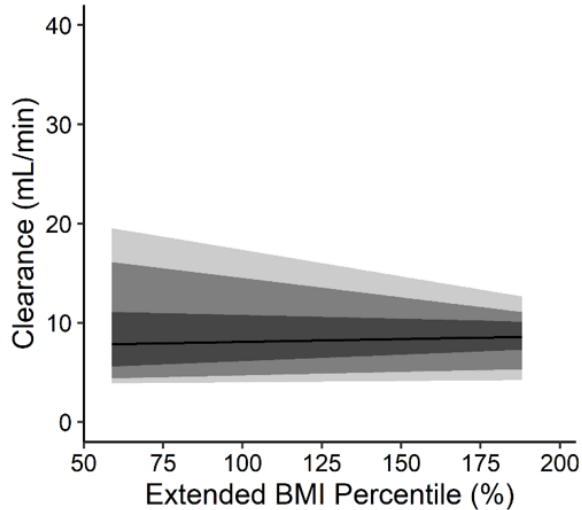

(f) SMX Volume of Distribution

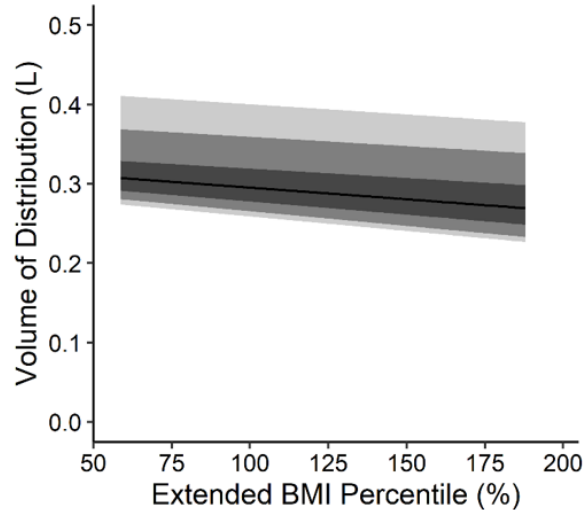

**Supplementary Figure 17.** Changes in simulated absolute clearance (a, c, e) and volume of distribution (b, d, f) for clindamycin (a, b), trimethoprim (c, d), and sulfamethoxazole (e, f) with increasing body size, or extended BMI percentile. Clearance and volume of distribution were calculated from virtual children aged 6 – 12 years with and without obesity. Extended BMI percentile is calculated as BMI divided by the 95<sup>th</sup> BMI percentile for a subject's age and sex, where children with an extended BMI percentile  $\geq 100\%$  are considered obese. Virtual children received single doses of 600 mg IV infusion (30 min) clindamycin, 160 mg PO trimethoprim, and 800 mg PO sulfamethoxazole. The shaded regions denote the 90% (95<sup>th</sup> and 5<sup>th</sup> percentiles), 80% (90<sup>th</sup> and 10<sup>th</sup> percentiles), and 50% (75<sup>th</sup> and 25<sup>th</sup> percentiles) prediction intervals from lightest to darkest color intensity, respectively. The black line denotes the median. Note that variability in PK parameters appears decreased at the upper extremity of extended BMI percentile due to a lower number of virtual subjects in this range.

BMI, body mass index; CLIN, clindamycin; IV, intravenous; PO, oral dose; SMX, sulfamethoxazole; TMP, trimethoprim

(a) CLIN Clearance

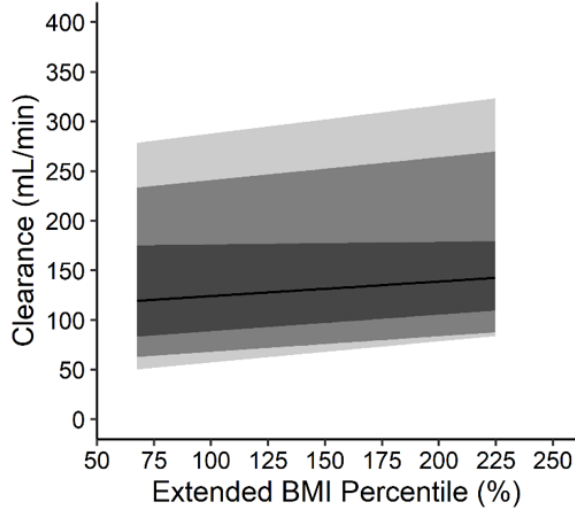

(b) CLIN Volume of Distribution

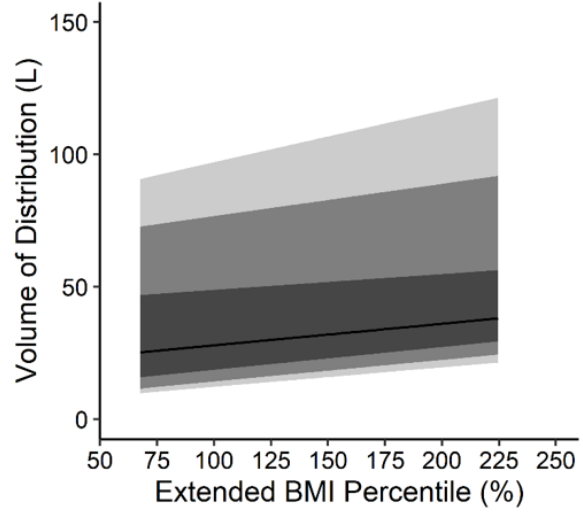

(c) TMP Clearance

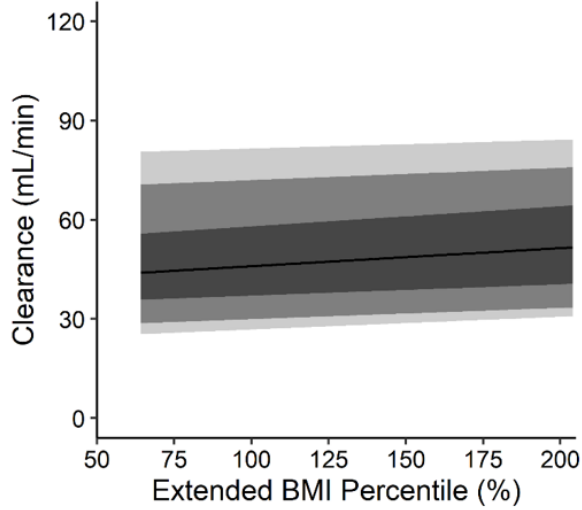

(d) TMP Volume of Distribution

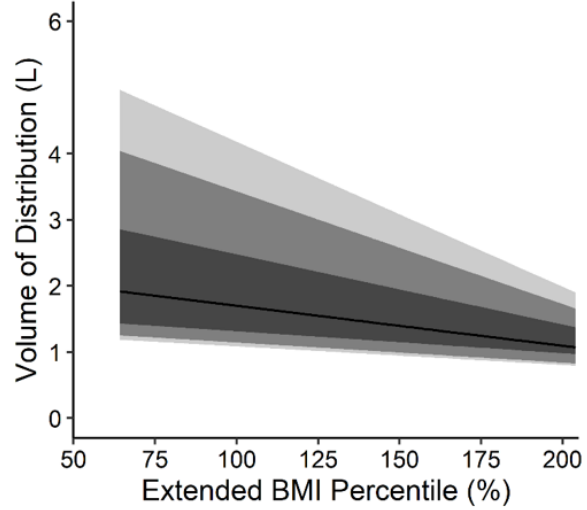

(e) SMX Clearance

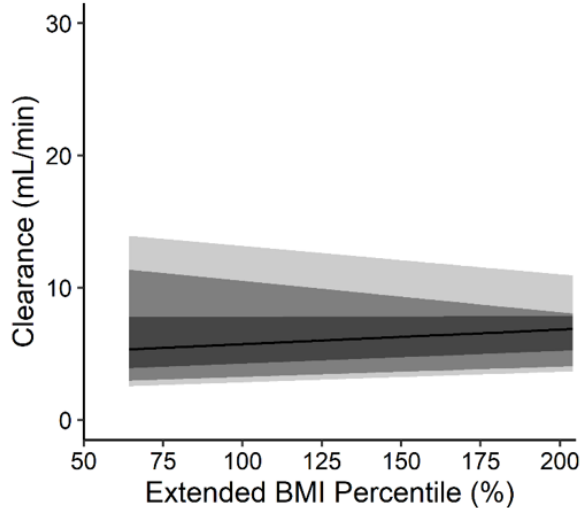

(f) SMX Volume of Distribution

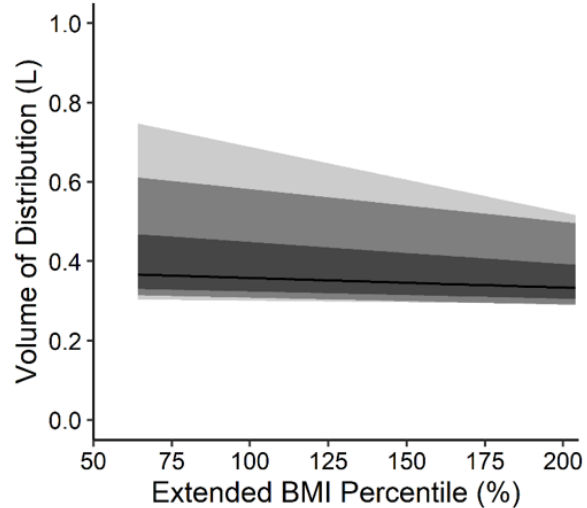

**Supplementary Figure 18.** Changes in simulated absolute clearance (a, c, e) and volume of distribution (b, d, f) for clindamycin (a, b), trimethoprim (c, d), and sulfamethoxazole (e, f) with increasing body size, or extended BMI percentile. Clearance and volume of distribution were calculated from virtual children aged 2 – 6 years with and without obesity. Extended BMI percentile is calculated as BMI divided by the 95<sup>th</sup> BMI percentile for a subject's age and sex, where children with an extended BMI percentile  $\geq 100\%$  are considered obese. Virtual children received single doses of 600 mg IV infusion (30 min) clindamycin, 160 mg PO trimethoprim, and 800 mg PO sulfamethoxazole. The shaded regions denote the 90% (95<sup>th</sup> and 5<sup>th</sup> percentiles), 80% (90<sup>th</sup> and 10<sup>th</sup> percentiles), and 50% (75<sup>th</sup> and 25<sup>th</sup> percentiles) prediction intervals from lightest to darkest color intensity, respectively. The black line denotes the median. Note that variability in PK parameters appears decreased at the upper extremity of extended BMI percentile due to a lower number of virtual subjects in this range.

BMI, body mass index; CLIN, clindamycin; IV, intravenous; PO, oral dose; SMX, sulfamethoxazole; TMP, trimethoprim

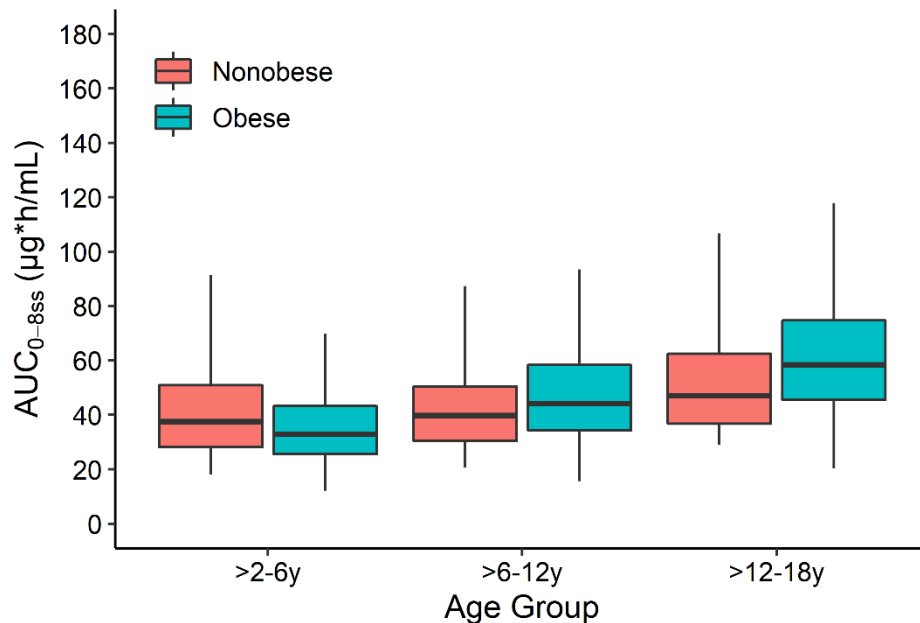

**Supplementary Figure 19.** Boxplots of simulated clindamycin  $AUC_{0-8,ss}$  in virtual children with and without obesity ( $n = 1,000$ ) following population simulations. All virtual children received either recommended dosing of 12 mg/kg for children >2-6 years or 10 mg/kg for children >6-18 years. Simulated exposure in virtual children without obesity was previously published [13]. Boxes represent the median and IQR, and whiskers extend to the minimum and maximum values.

$AUC_{0-8,ss}$ , steady-state area under the concentration time curve from 0 to 8 hours; IQR, interquartile range



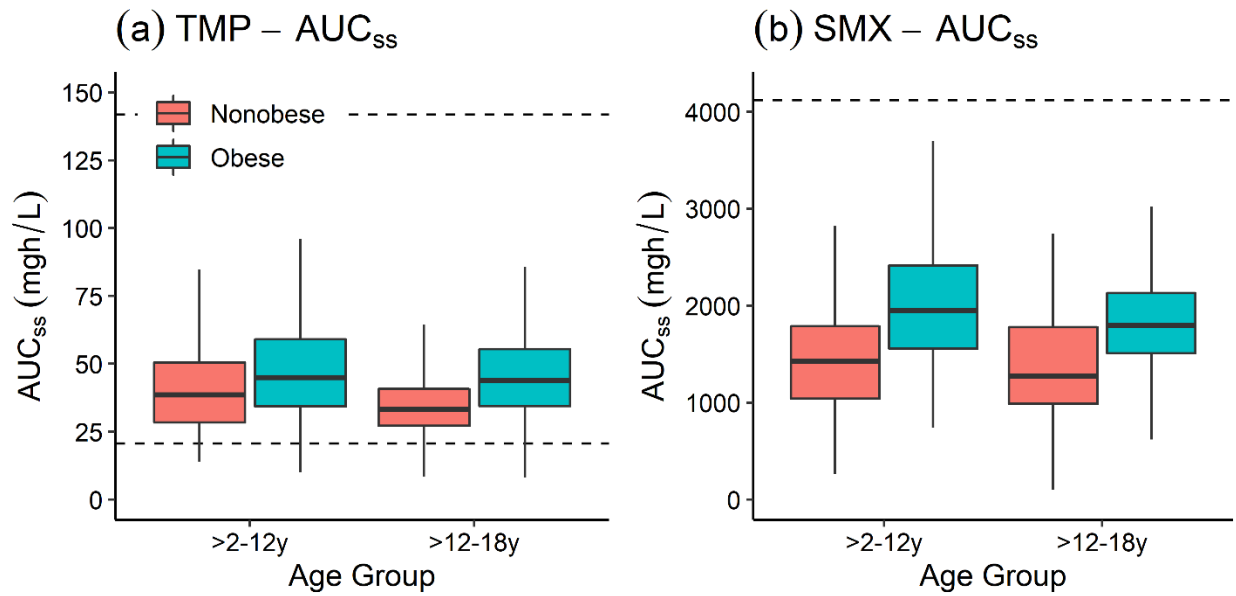

**Supplementary Figure 20.** Boxplots of simulated trimethoprim and sulfamethoxazole AUC<sub>ss</sub> in virtual children with (n = 1,000) and without obesity following population simulations. All virtual children received recommended dosing of 6 and 30 mg/kg for children >2-12 years and 4 and 20 mg/kg for children >12-18 years for trimethoprim and sulfamethoxazole, respectively. Simulated exposure in virtual children without obesity was previously published [14]. Boxes represent the median and IQR, and whiskers extend to the minimum and maximum values. The solid line represents the target AUC<sub>ss</sub> efficacy threshold for trimethoprim, and the dashed lines represent the toxicity AUC<sub>ss</sub> threshold for both trimethoprim and sulfamethoxazole.

AUC<sub>ss</sub>, steady-state area under the concentration time curve from 0 to 8 hours; IQR, interquartile range; SMX, sulfamethoxazole; TMP, trimethoprim

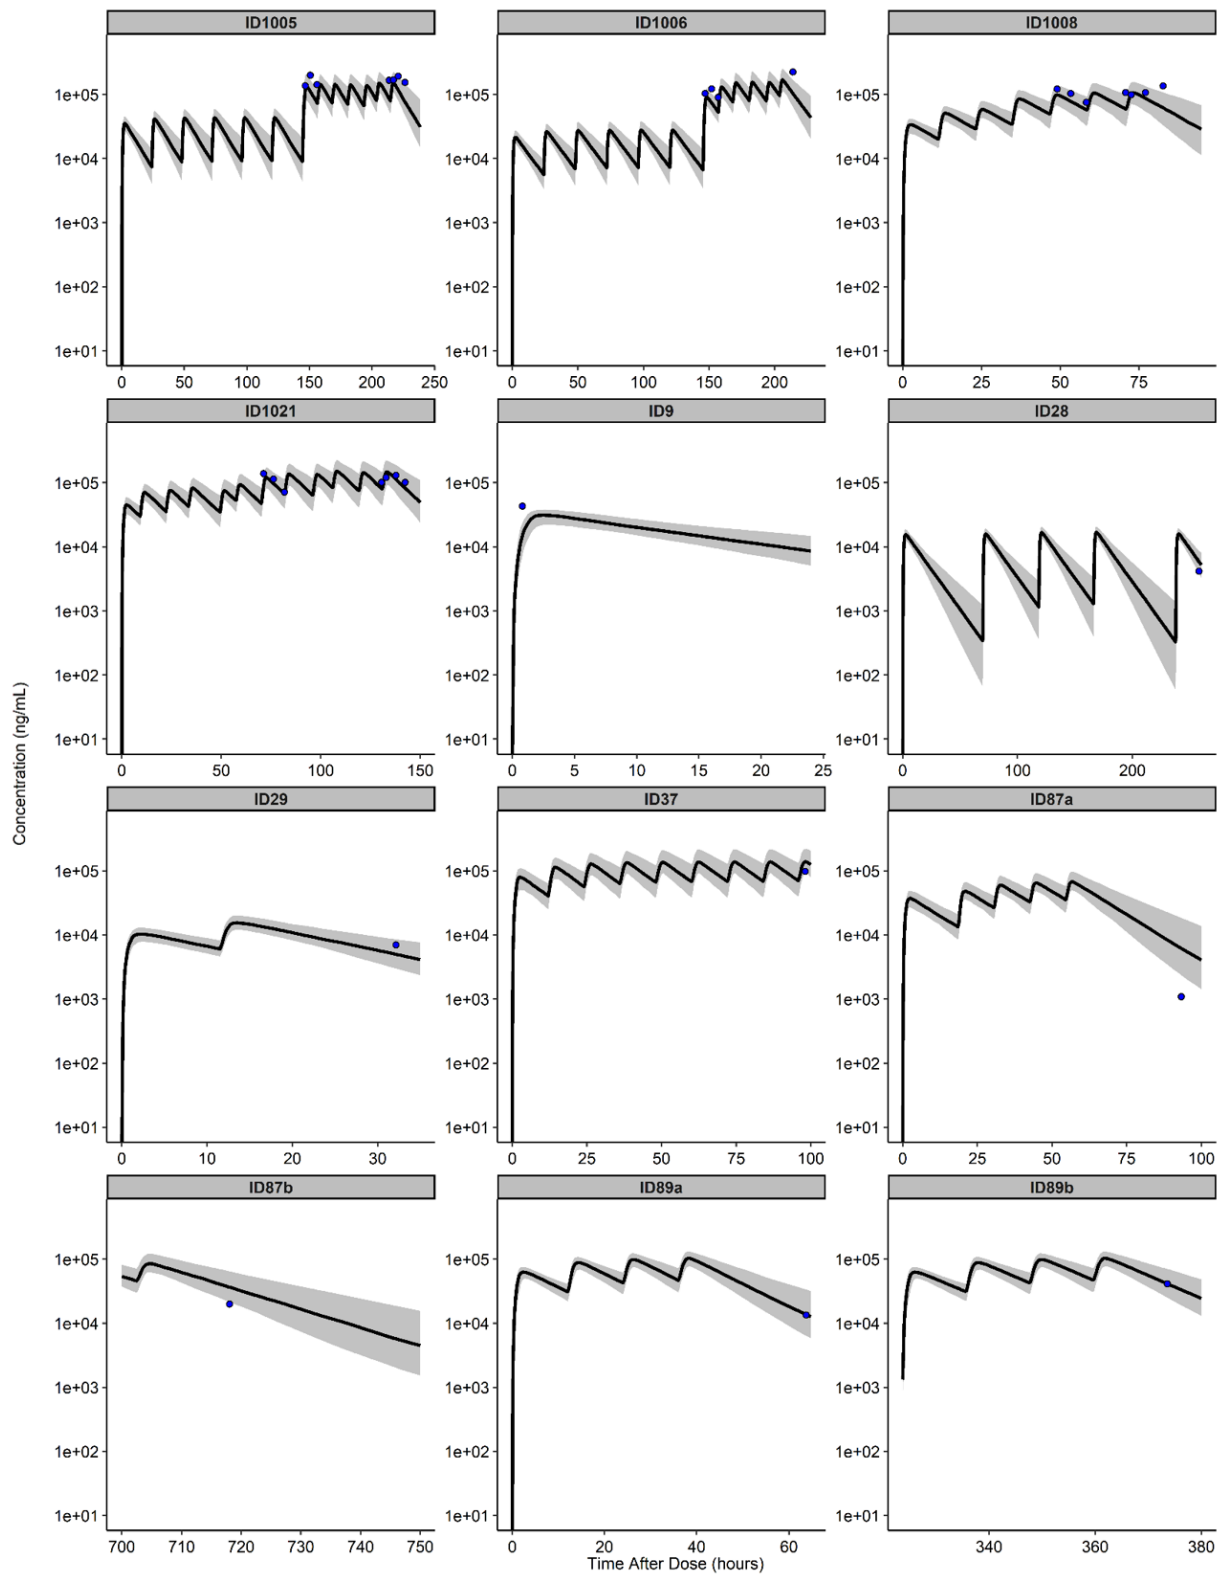

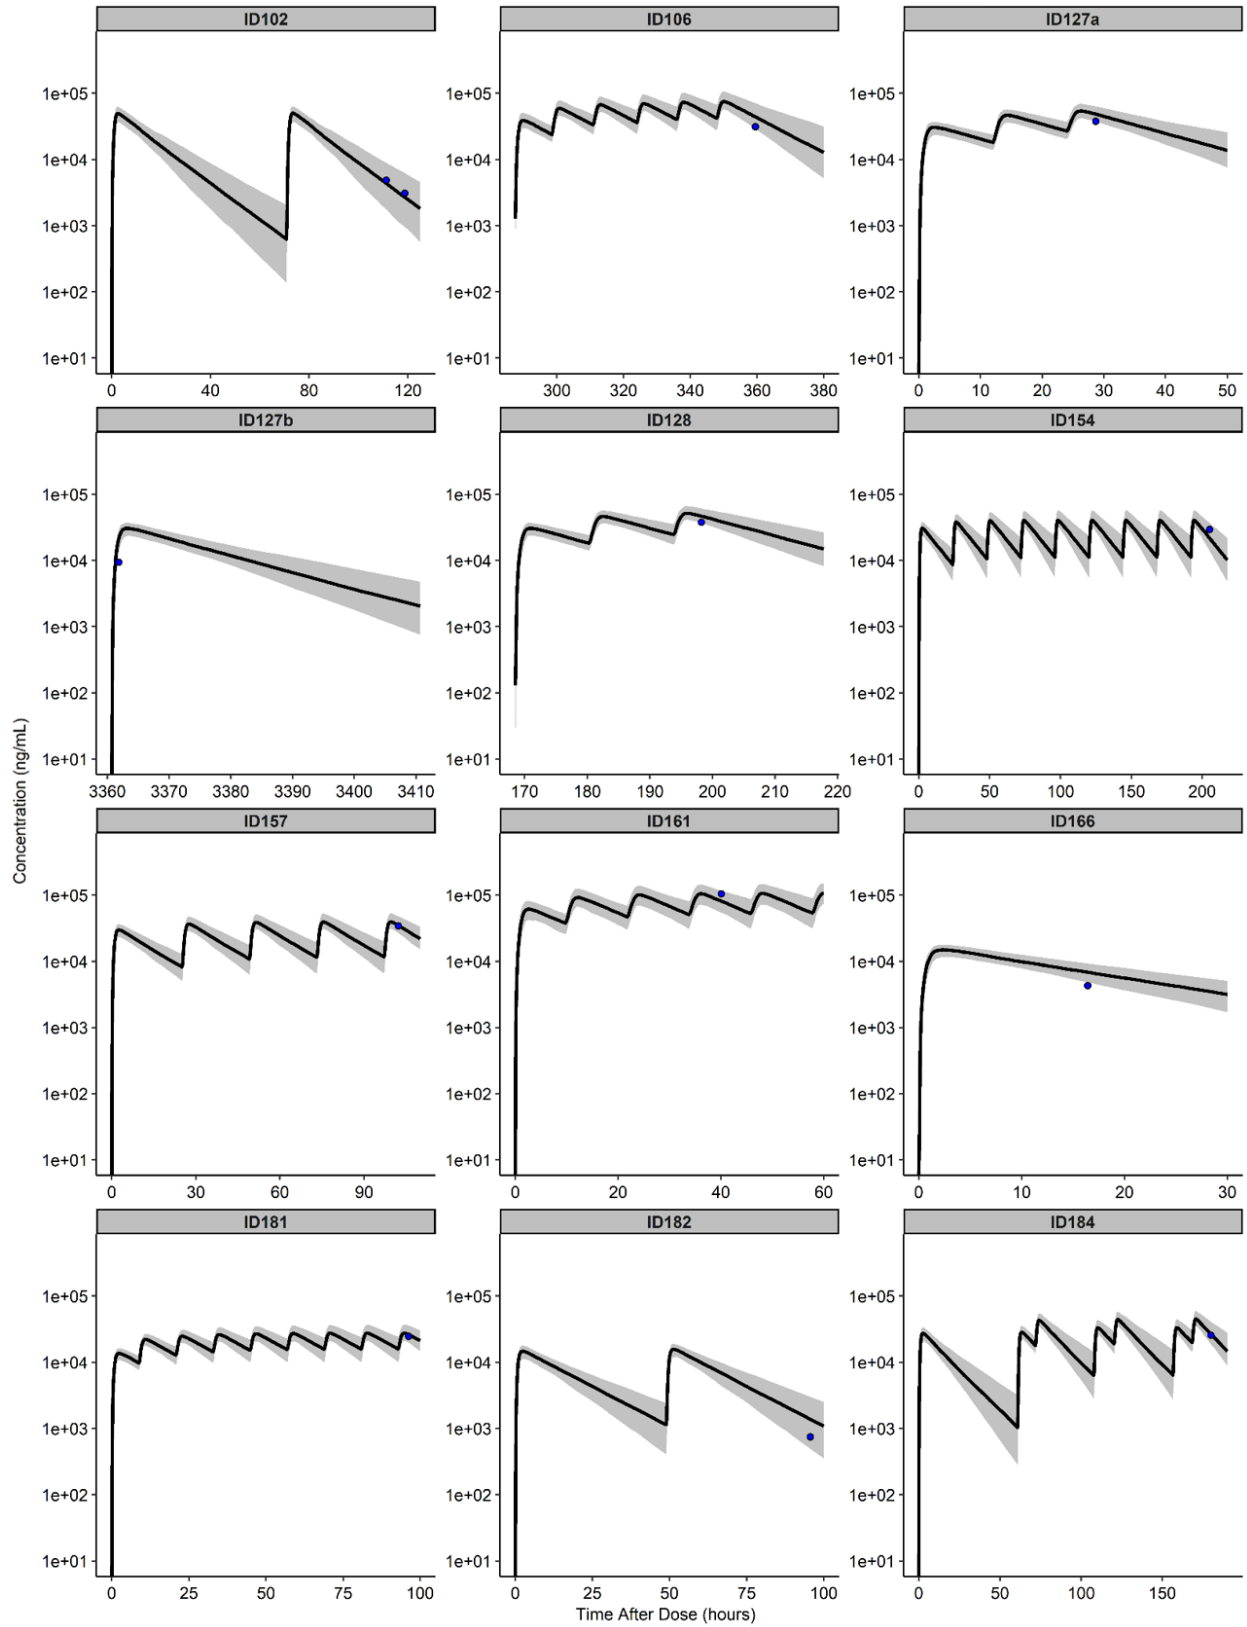

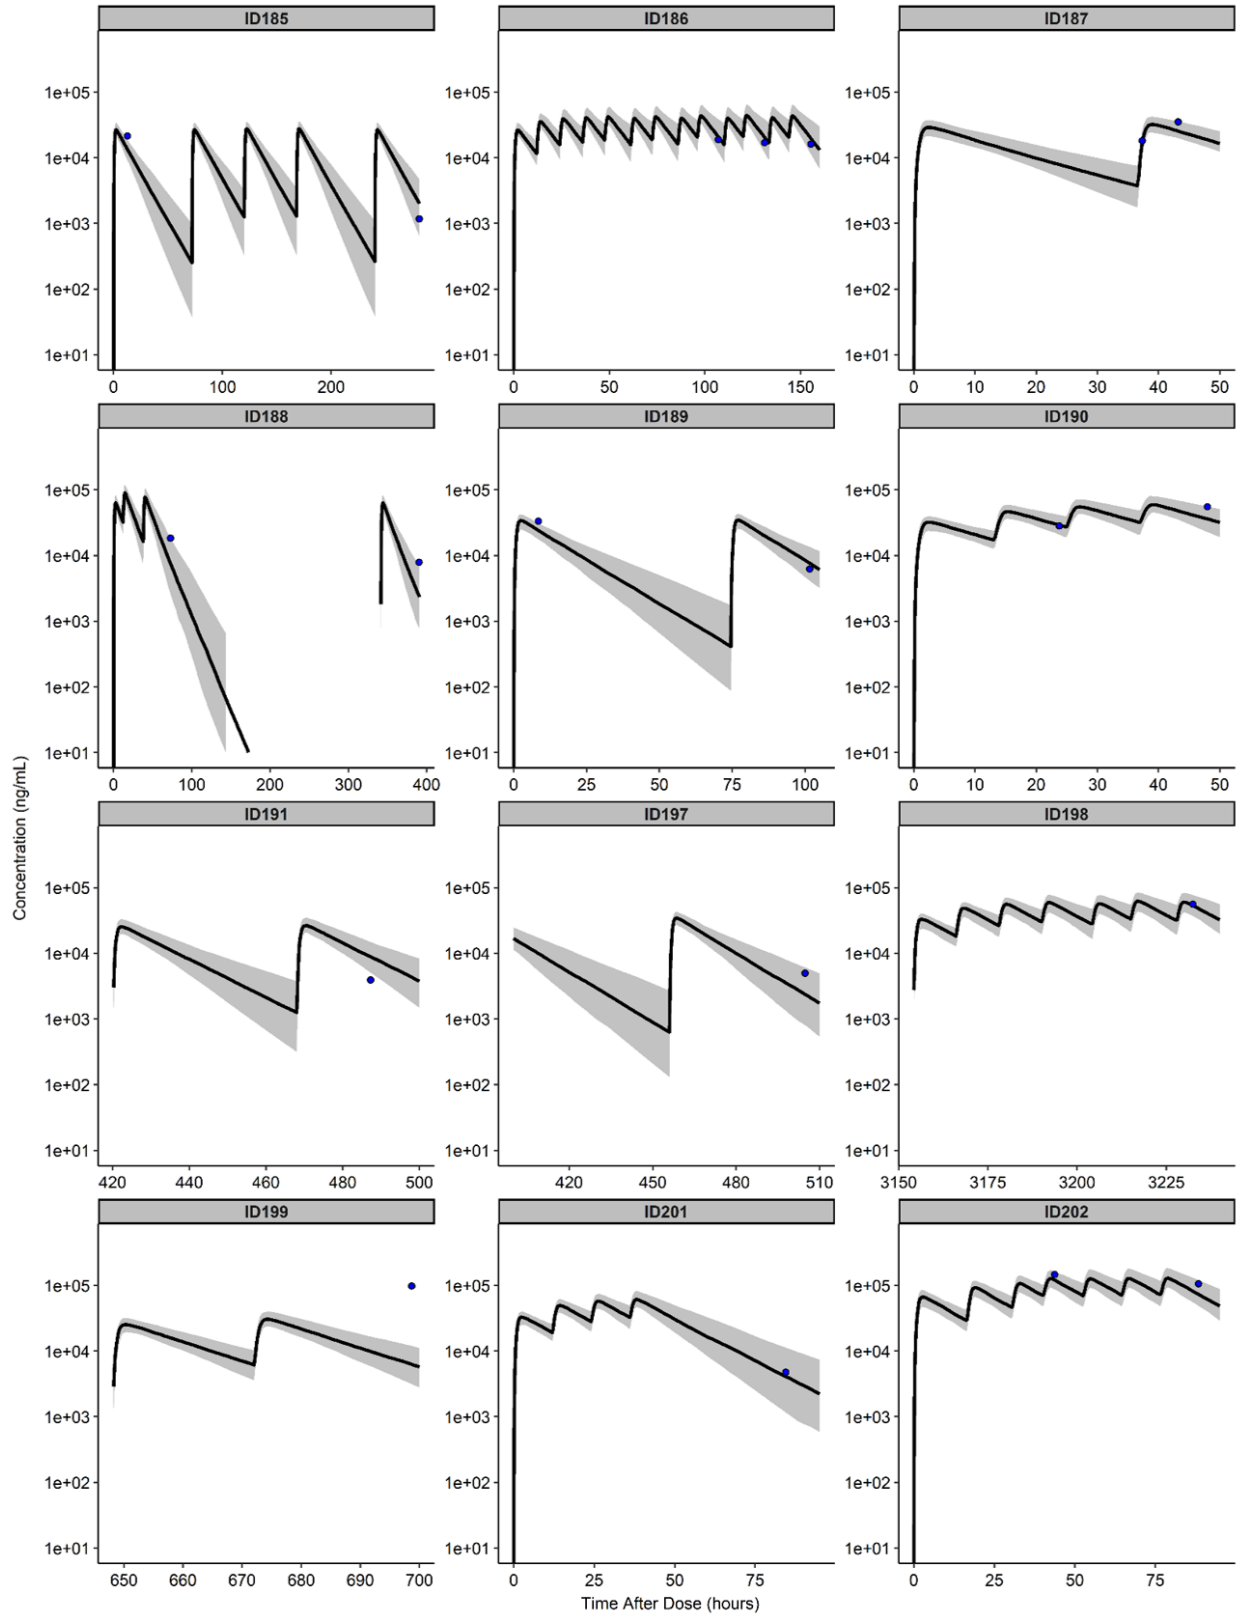

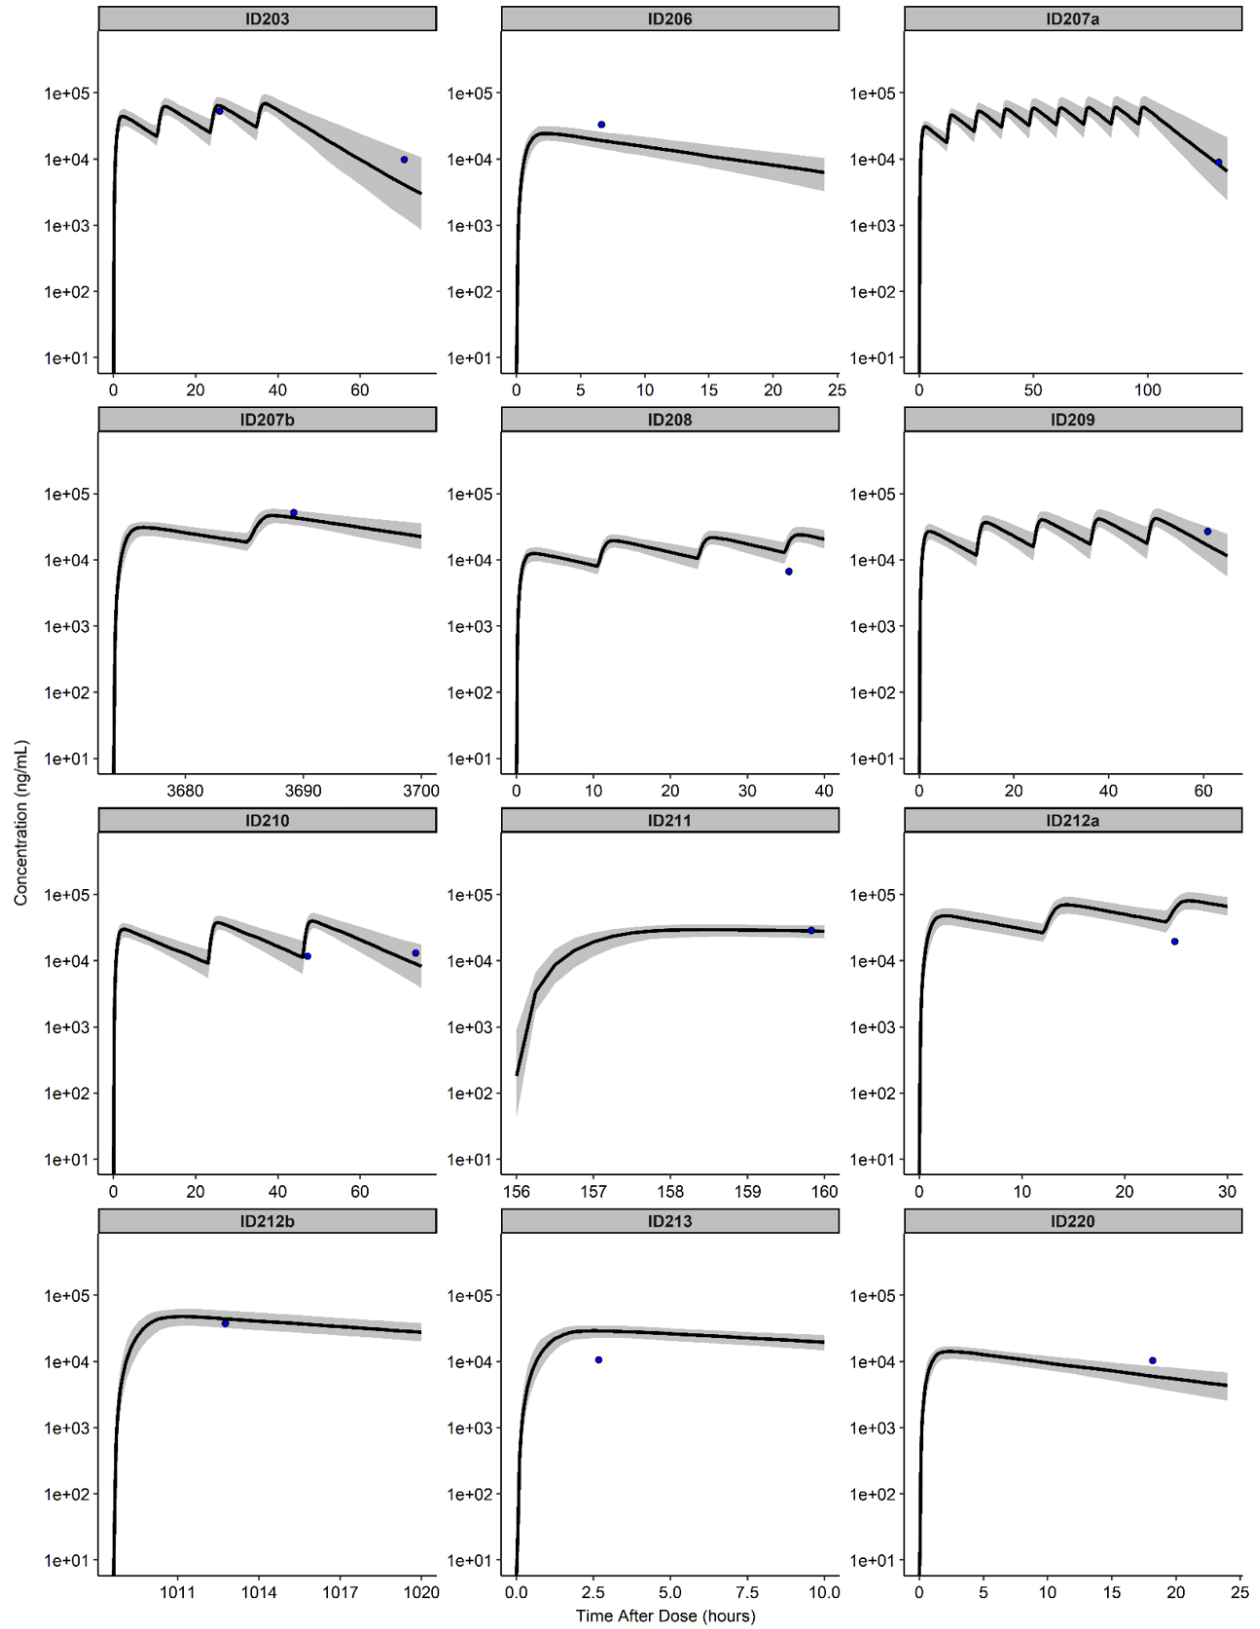

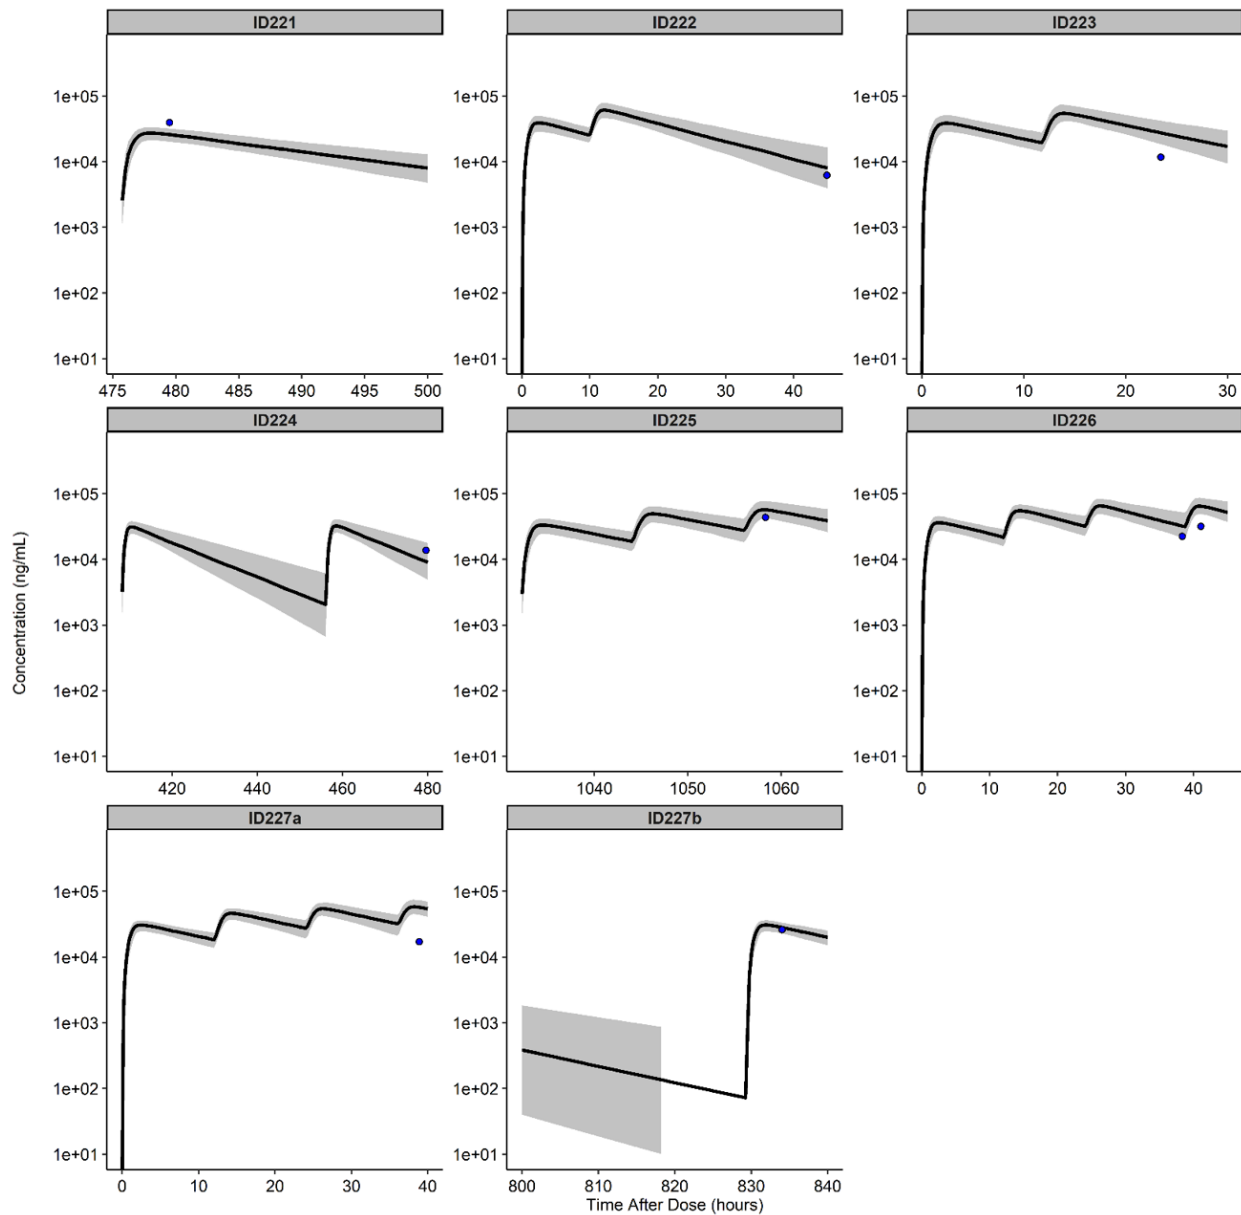

**Supplementary Figure 21.** Population simulations ( $n=250$ ) of plasma sulfamethoxazole concentration using “individualized populations” for each observed pediatric subject with obesity that are matched to that particular subject’s demographics and dosing regimen, after increasing NAT2 clearance five-fold for obesity. The shaded regions are the 90% model prediction interval, which are overlaid with points representing observed plasma concentrations from the POP01 and External Data Study.

NAT2, N-acetyl transferase 2; POP01, Pharmacokinetics of Understudied Drugs Administered to Children Per Standard of Care (ClinicalTrials.gov #NCT01431326) Study

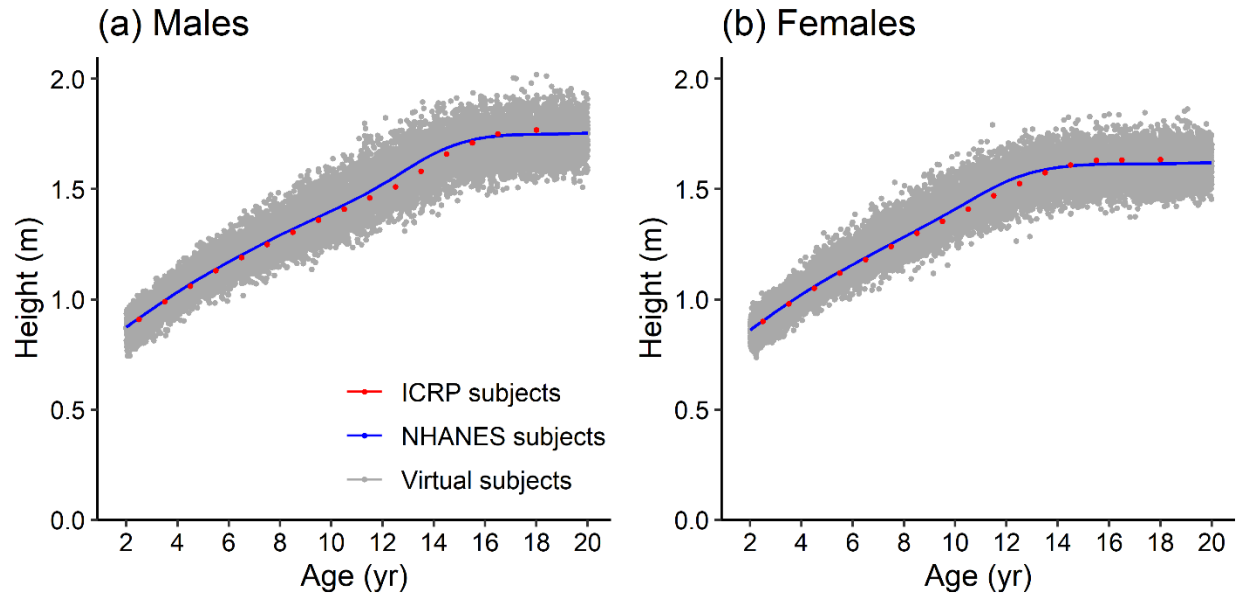

**Supplementary Figure 22.** Height versus age for male (a) and female (b) children. Simulated Asian, Black, Mexican, and White American virtual children with obesity are represented by the gray points. The central tendency of the data for all NHANES subjects is represented by the blue line, which is the Loess line as calculated by the generalized additive model. Average reported ICRP values for each age bin are represented by the red points.

ICRP, International Commission on Radiological Protection; NHANES, National Health and Nutrition Examination Survey

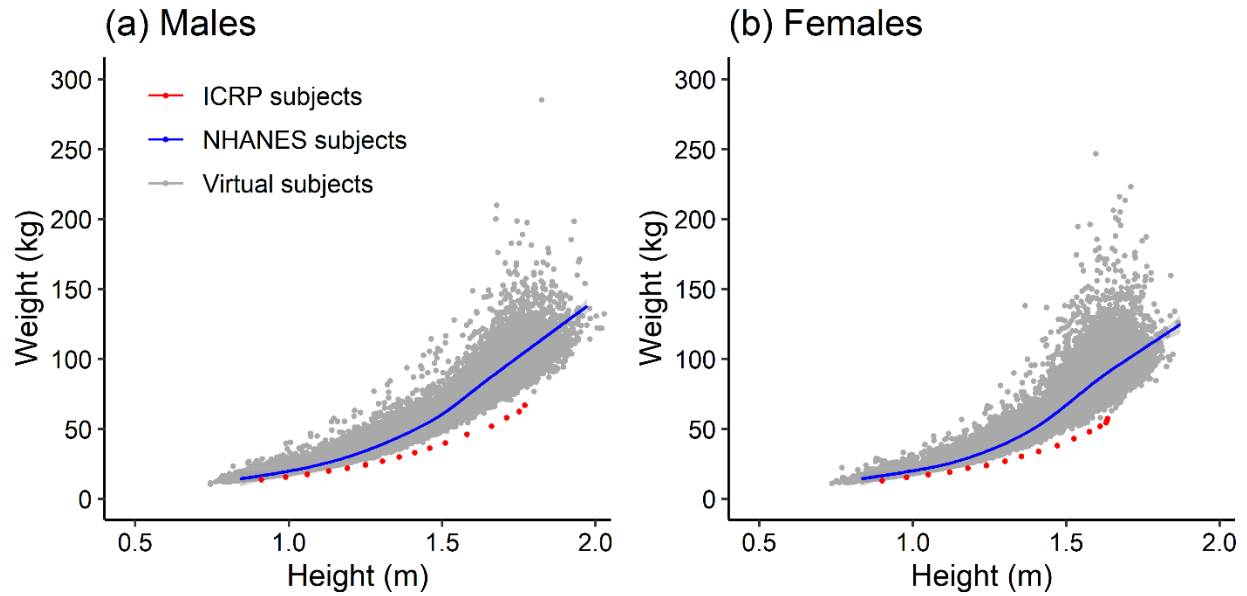

**Supplementary Figure 23.** Weight versus height for male (a), and female (b) children. Simulated Asian, Black, Mexican, and White American virtual children with obesity are represented by the gray points. The central tendency of the data for NHANES subjects with obesity is represented by the blue lines, which are the Loess line as calculated by the generalized additive model. Average reported ICRP values, developed from observed children without obesity, for each age bin are represented by the red points.

ICRP, International Commission on Radiological Protection; NHANES, National Health and Nutrition Examination Survey



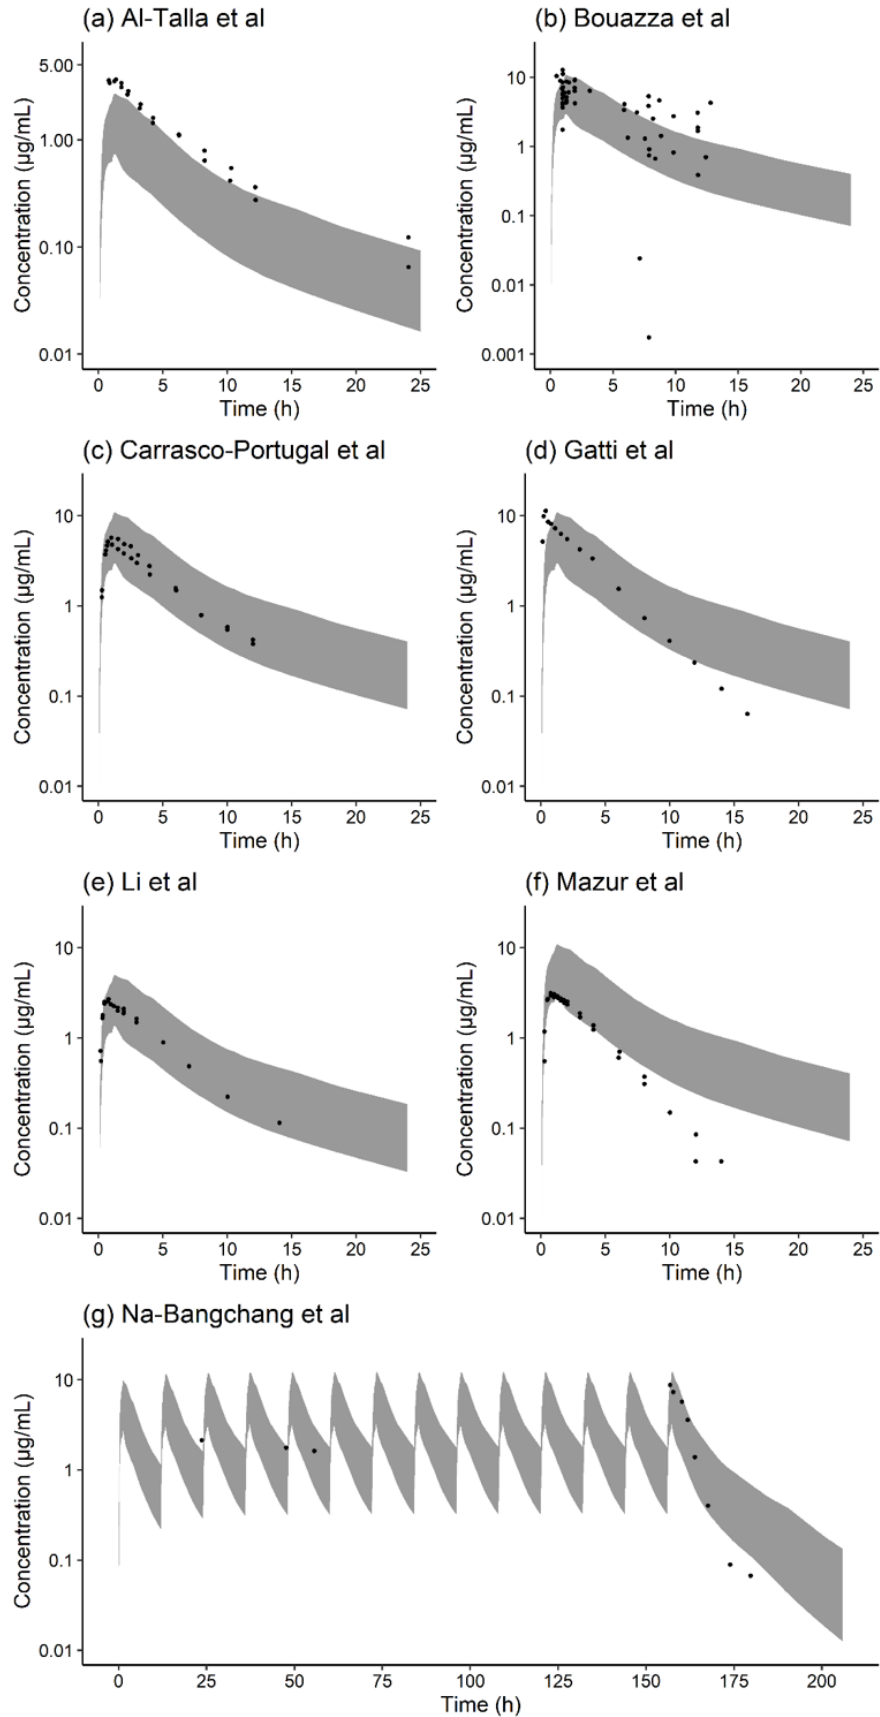

**Supplementary Figure 24.** Population simulations (n=100) of plasma clindamycin concentrations digitized from healthy adult volunteers receiving orally administered clindamycin. Shaded regions represent the 90% model prediction interval, and points are digitized observed plasma concentrations [15-21]. Simulated dosing included 150 mg (a), 600 mg (b, c, d, f), and 300 mg (e) single oral doses and 600 mg multiple oral dosing every 12 hours (g).

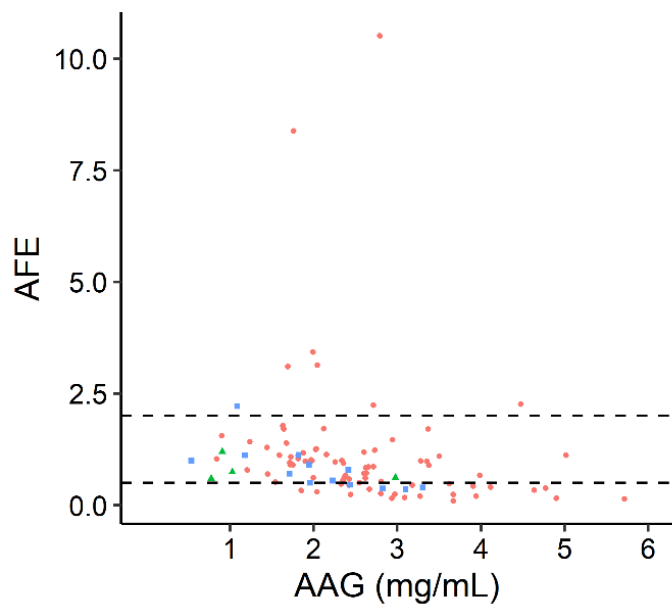

**Supplementary Figure 25.** AFE for pediatric subjects with obesity who received clindamycin plotted versus AAG without adjusting fraction unbound based on observed AAG concentration. Dashed lines represent 2-fold error for reference. AFE was calculated using median simulated concentration.

AAG,  $\alpha$ 1-acid glycoprotein; AFE, average fold error; BMI, body mass index

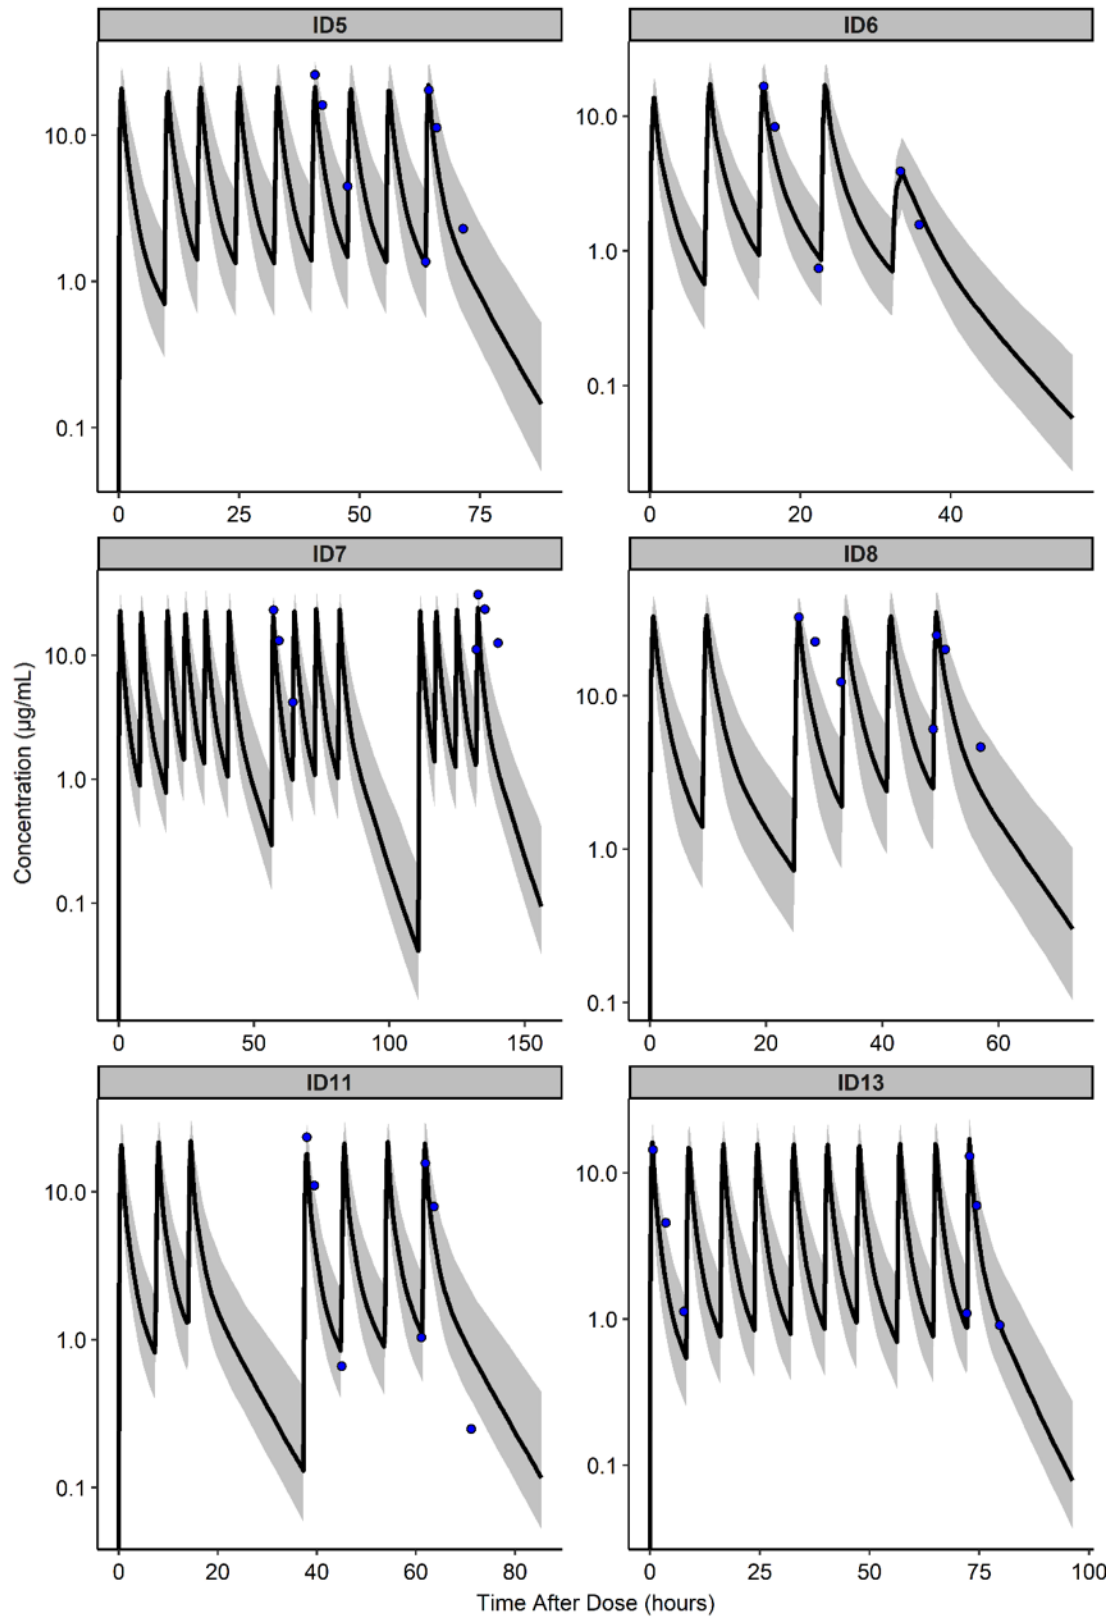

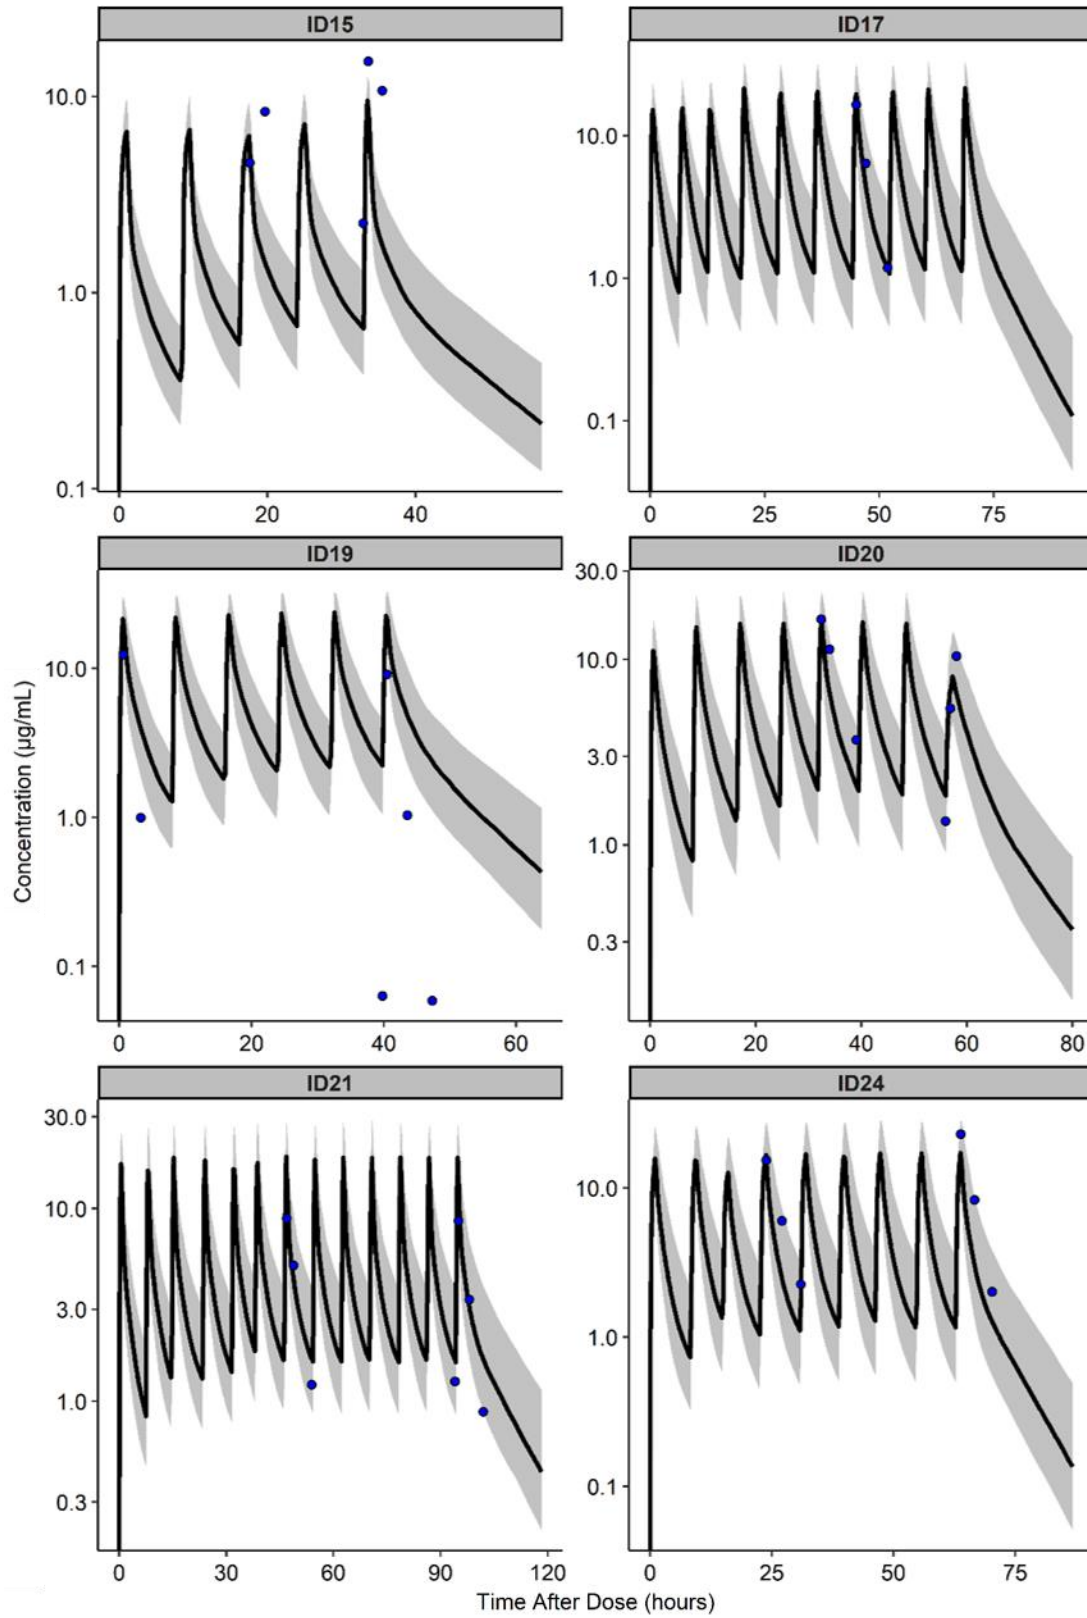

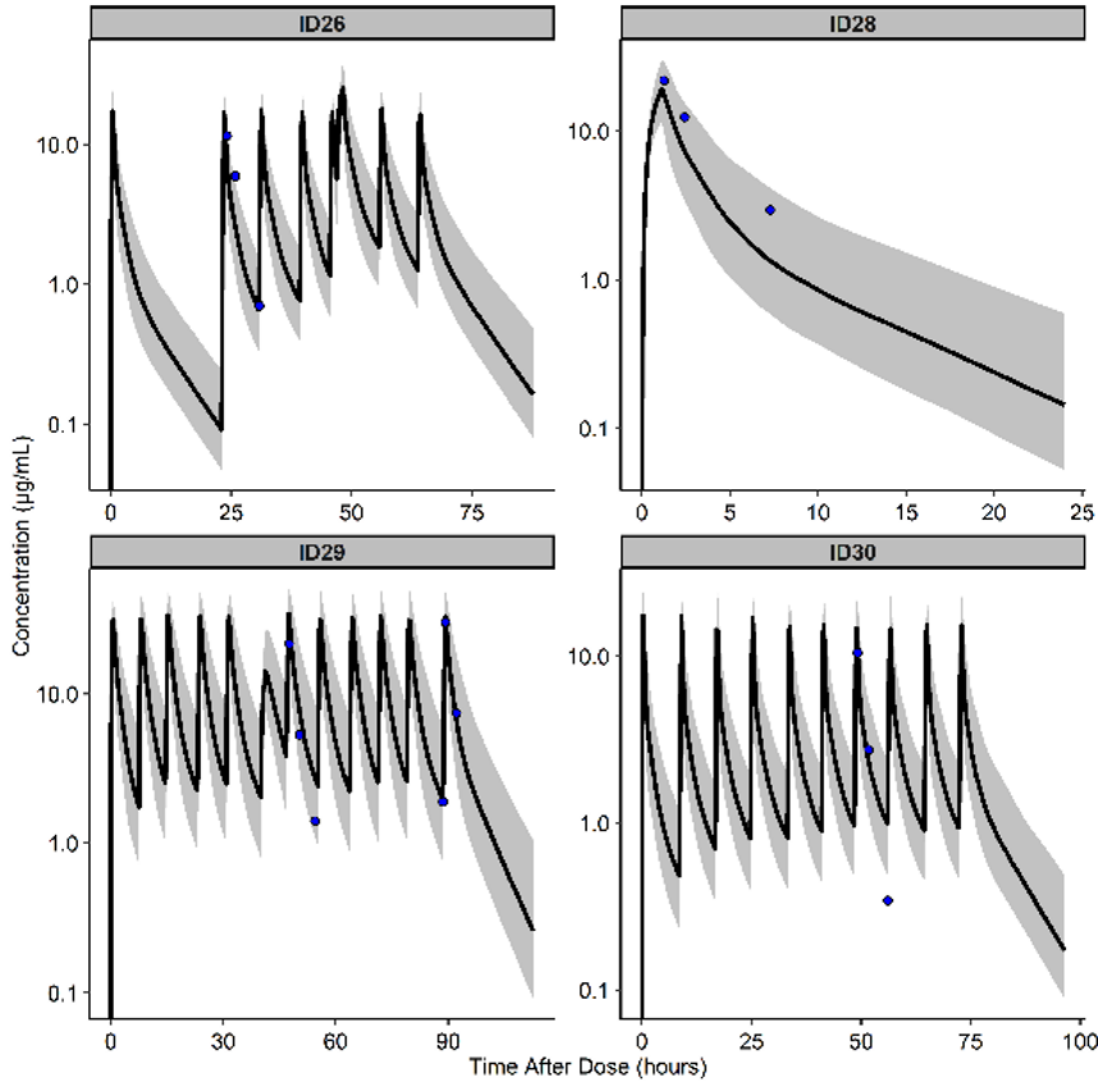

**Supplementary Figure 26.** Population simulations (n=250) of plasma clindamycin concentration after adjusting fraction unbound using reported AAG concentrations using “individualized populations” for each observed pediatric subject without obesity that are matched to that particular subject’s demographics and dosing regimen. The shaded regions are the 90% model prediction interval, which are overlaid with points representing observed plasma concentrations from the External Data Study.

AAG,  $\alpha$ 1-acid glycoprotein

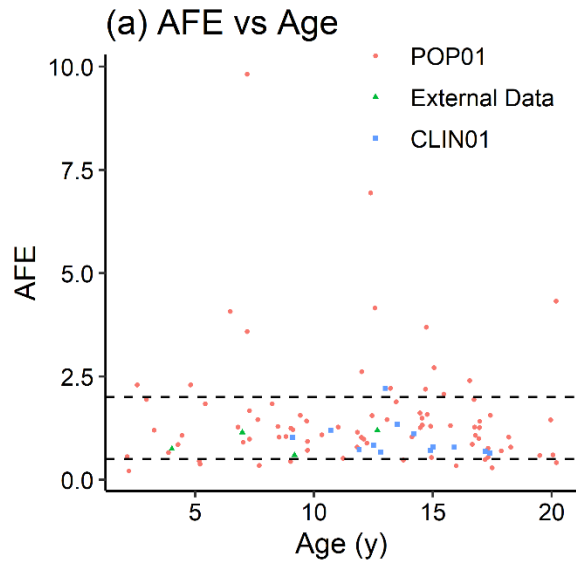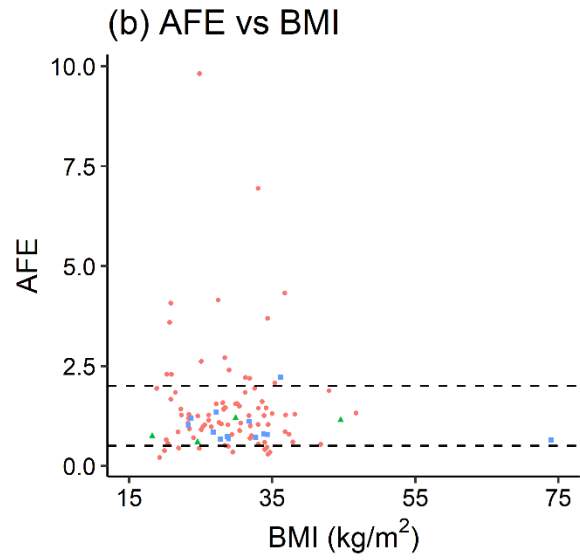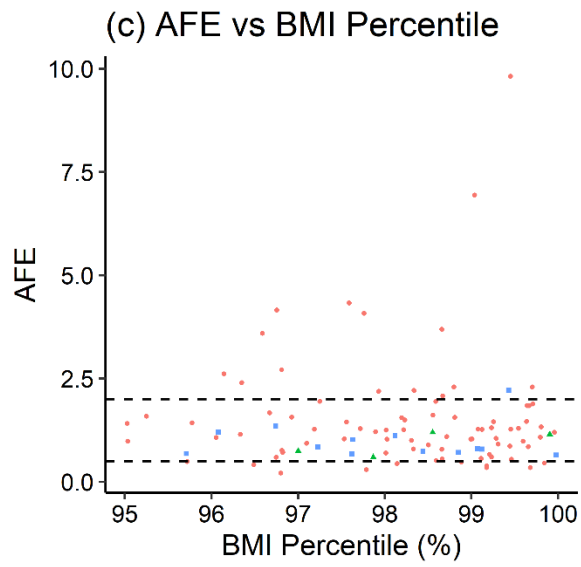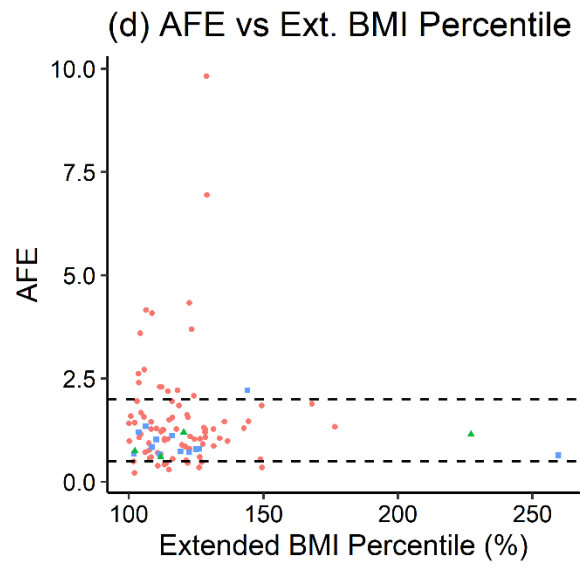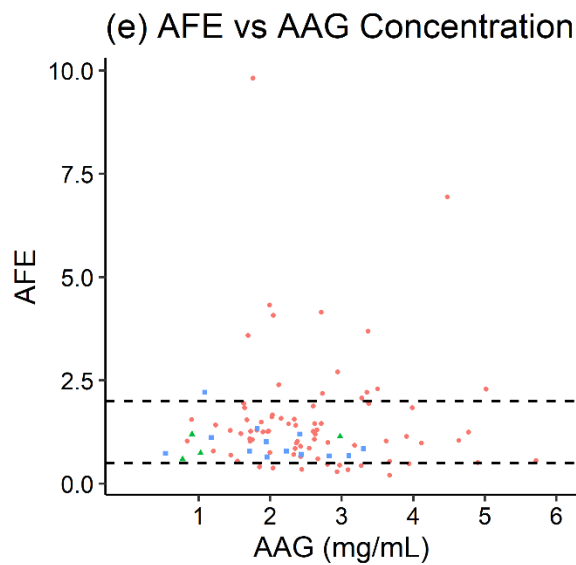

**Supplementary Figure 27.** AFE for pediatric subjects with obesity who received clindamycin plotted versus age, body size, and AAG after adjusting fraction unbound based on observed AAG concentration. Dashed lines represent 2-fold error for reference. AFE was calculated using median simulated concentration. Note that one subject (aged 7 years with a BMI of 22.9, BMI percentile of 98.3%, and AAG concentration of 2.8 mg/mL) with an outlying AFE of 21.0 was removed for better visualization. Ext. BMI percentile is calculated as BMI divided by the 95<sup>th</sup> BMI percentile for a subject's age and sex, where children with an extended BMI percentile  $\geq$  100% are considered obese.

AAG,  $\alpha$ 1-acid glycoprotein; AFE, average fold error; BMI, body mass index; CLIN01, Safety and Pharmacokinetics of Clindamycin in Pediatric Subjects with BMI  $\geq$  85<sup>th</sup> Percentile (ClinicalTrials.gov #NCT01744730) Study; Ext., extended; POP01, Pharmacokinetics of Understudied Drugs Administered to Children Per Standard of Care (ClinicalTrials.gov #NCT01431326) Study



## 4 SUPPLEMENTARY TABLES

**Supplementary Table 1.** Summary of clinical studies used for pediatric PBPK modeling.

| <b>CLINDAMYCIN</b>                     |                                                         |
|----------------------------------------|---------------------------------------------------------|
| <b>POP01 Study</b>                     | Originally described in Gonzalez et al [22]             |
|                                        | Nonobese PBPK modeling published in Hornik et al [13]   |
|                                        | Obese PBPK modeling presented here                      |
| <b>External Data Study</b>             | Originally published here                               |
|                                        | Nonobese PBPK modeling presented here                   |
|                                        | Obese PBPK modeling presented here                      |
| <b>CLIN01 Study</b>                    | Originally described in Smith et al [23]                |
|                                        | Obese PBPK modeling presented here                      |
| <b>TRIMETHOPRIM / SULFAMETHOXAZOLE</b> |                                                         |
| <b>POP01 Study</b>                     | Originally described in Autmizguine et al [9]           |
|                                        | Nonobese PBPK modeling published in Thompson et al [13] |
|                                        | Obese PBPK modeling presented here                      |
| <b>External Data Study</b>             | Originally described in Wu et al [24]                   |
|                                        | Nonobese PBPK modeling presented here                   |
|                                        | Obese PBPK modeling presented here                      |

CLIN01, Safety and Pharmacokinetics of Clindamycin in Pediatric Subjects with BMI  $\geq$  85th Percentile (ClinicalTrials.gov #NCT01744730) Study; PBPK, physiologically-based pharmacokinetic; POP01, Pharmacokinetics of Understudied Drugs Administered to Children Per Standard of Care (ClinicalTrials.gov #NCT01431326) Study

**Supplementary Table 2.** Population demographics for pediatric subjects without obesity who received clindamycin from the External Data Study used to evaluate the pediatric PBPK model.

| <b>Demographics<sup>a</sup></b>  | <b>External Data Study (<i>n</i>=16)</b> |
|----------------------------------|------------------------------------------|
| n, samples                       | 88                                       |
| Age, years                       | 7.2 (3.6, 16.0)                          |
| Age group                        |                                          |
| 2 ≤ and < 6 years                | 6 (37.5%)                                |
| 6 ≤ and < 12 years               | 6 (37.5%)                                |
| 12 ≤ and < 21 years              | 4 (25.0%)                                |
| Weight, kg                       | 25.1 (14.7, 63.2)                        |
| Height, cm                       | 126.0 (96.5, 176.0) [1 <sup>b</sup> ]    |
| BMI, kg/m <sup>2</sup>           | 16.6 (14.2, 22.4) [1 <sup>b</sup> ]      |
| BMI percentile, %                | 60.4 (18.5, 85.9) [1 <sup>b</sup> ]      |
| Extended BMI percentile, %       | 86.6 (68.1, 92.4) [1 <sup>b</sup> ]      |
| Male                             | 8 (50.0%)                                |
| Race                             |                                          |
| White                            | 13 (81.3%)                               |
| Black or African American        | 2 (12.5%)                                |
| Asian                            | 0 (0%)                                   |
| Native Hawaiian/Pacific Islander | 0 (0%)                                   |
| Unknown/Not reported             | 1 (6.3%)                                 |
| Ethnicity                        |                                          |
| Hispanic/Latino                  | 0 (0%)                                   |
| Not Hispanic/Latino              | 0 (0%)                                   |
| Unknown/Not reported             | 16 (100.0%)                              |
| AAG, mg/mL                       | 1.75 (0.29, 3.19)                        |
| Albumin, g/dL                    | 3.30 (3.20, 4.00) [11]                   |
| SCR, mg/dL                       | 0.40 (0.23, 0.63)                        |
| AST, U/L                         | [16]                                     |
| ALT, U/L                         | [16]                                     |

<sup>a</sup>Demographics recorded at the time of the first study dose were used to calculate descriptive statistics. Values are medians (range) [missing] for continuous variables and counts (%) for categorical variables. Extended BMI percentile is calculated as BMI divided by the 95<sup>th</sup> BMI percentile for a subject's age and sex, where children with an extended BMI percentile ≥ 100% are considered obese.

<sup>b</sup>One subject did not have a height recorded, so BMI, BMI percentile, and extended BMI percentile could not be calculated. This subject was included in the nonobese cohort since her weight was approximately 50<sup>th</sup> percentile for age.

AAG,  $\alpha$ 1-acid glycoprotein; ALT, alanine transaminase; AST, aspartate aminotransferase; BMI, body mass index; SCR, serum creatinine

**Supplementary Table 3.** Population demographics for pediatric subjects with obesity who received clindamycin from the POP01, CLIN01, and External Data Study and combined dataset.

| <b>Demographics<sup>a</sup></b>        | <b>POP01<br/>(n=84)</b>   | <b>CLIN01 (n=13)</b> | <b>External Data<br/>Study (n=4)</b> | <b>Combined (n=101)</b>   |
|----------------------------------------|---------------------------|----------------------|--------------------------------------|---------------------------|
| n, samples                             | 107                       | 53                   | 28                                   | 188                       |
| Age, years                             | 12.3 (2.1, 20.2)          | 13.5 (9.1, 17.4)     | 8.1 (4.0, 12.7)                      | 12.5 (2.1, 20.2)          |
| Age group                              |                           |                      |                                      |                           |
| 2 ≤ and < 6 years                      | 12 (14.3%)                | 0 (0%)               | 1 (25.0%)                            | 13 (12.9%)                |
| 6 ≤ and < 12 years                     | 27 (32.1%)                | 3 (23.1%)            | 2 (50.0%)                            | 32 (31.7%)                |
| 12 ≤ and < 21 years                    | 45 (53.6%)                | 10 (76.9%)           | 1 (25.0%)                            | 56 (55.4%)                |
| Weight, kg                             | 63.9 (12.8, 139.8)        | 76.4 (49.5, 224.0)   | 51.1 (16.8, 72.7)                    | 66.6 (12.8, 224.0)        |
| Height, cm                             | 147.5 (81.0, 193.0)       | 155.0 (134.4, 188.0) | 123.2 (96.0, 156.0)                  | 152.0 (81.0, 193.0)       |
| BMI, kg/m <sup>2</sup>                 | 28.8 (18.9, 46.7)         | 28.9 (23.3, 74.0)    | 27.2 (18.2, 44.6)                    | 28.9 (18.2, 74.0)         |
| BMI percentile, %                      | 98.5 (95.0, 100.0)        | 98.1 (95.7, 100.0)   | 98.2 (97.0, 99.9)                    | 98.4 (95.0, 100.0)        |
| Extended BMI percentile, %             | 115.6 (100.0, 176.6)      | 116.1 (101.9, 259.6) | 116.1 (102.2, 227.2)                 | 116.1 (100.0, 259.6)      |
| Male                                   | 41 (48.8%)                | 12 (92.3%)           | 2 (50.0%)                            | 55 (54.5%)                |
| Race                                   |                           |                      |                                      |                           |
| White                                  | 63 (75.0%)                | 11 (84.6%)           | 4 (100.0%)                           | 78 (77.2%)                |
| Black or African<br>American           | 12 (14.3%)                | 1 (7.7%)             | 0 (0%)                               | 13 (12.9%)                |
| Asian                                  | 1 (1.2%)                  | 0 (0%)               | 0 (0%)                               | 1 (1.0%)                  |
| Native<br>Hawaiian/Pacific<br>Islander | 1 (1.2%)                  | 0 (0%)               | 0 (0%)                               | 1 (1.0%)                  |
| Unknown/Not reported                   | 7 (8.3%)                  | 1 (7.7%)             | 0 (0%)                               | 8 (7.9%)                  |
| Ethnicity                              |                           |                      |                                      |                           |
| Hispanic/Latino                        | 31 (36.9%)                | 1 (7.7%)             | 0 (0%)                               | 32 (31.7%)                |
| Not Hispanic/Latino                    | 53 (63.1%)                | 11 (84.6%)           | 0 (0%)                               | 64 (63.4%)                |
| Unknown/Not reported                   | 0 (0%)                    | 1 (7.7%)             | 4 (100.0%)                           | 5 (5.0%)                  |
| AAG, mg/mL                             | 2.43 (0.84, 5.72) [4]     | 2.04 (0.54, 3.31)    | 0.97 (0.78, 2.98)                    | 2.37 (0.54, 5.72) [4]     |
| Albumin, g/dL                          | 3.22 (1.90, 4.40)<br>[59] | 3.70 (2.60, 4.43)    | 2.85 (2.70, 3.00) [2]                | 3.45 (1.90, 4.43)<br>[63] |

|            |                           |                   |                   |                           |
|------------|---------------------------|-------------------|-------------------|---------------------------|
| SCR, mg/dL | 0.60 (0.20, 1.60)<br>[46] | 0.58 (0.31, 1.54) | 0.47 (0.27, 0.62) | 0.60 (0.20, 1.60)<br>[50] |
| AST, U/L   | 36 (15, 165) [69]         | 23 (8, 151)       | [4]               | 30 (8, 165) [73]          |
| ALT, U/L   | 36 (9, 165) [69]          | 28 (10, 114)      | [4]               | 32 (9, 165) [73]          |

<sup>a</sup>Demographics recorded at the time of the first study dose were used to calculate descriptive statistics. Values are medians (range) [missing] for continuous variables and counts (%) for categorical variables. Extended BMI percentile is calculated as BMI divided by the 95<sup>th</sup> BMI percentile for a subject's age and sex, where children with an extended BMI percentile  $\geq 100\%$  are considered obese.

AAG,  $\alpha$ 1-acid glycoprotein; ALT, alanine transaminase; AST, aspartate aminotransferase; BMI, body mass index; CLIN01, Safety and Pharmacokinetics of Clindamycin in Pediatric Subjects with BMI  $\geq 85$ th Percentile (ClinicalTrials.gov #NCT01744730) Study; POP01, Pharmacokinetics of Understudied Drugs Administered to Children Per Standard of Care (ClinicalTrials.gov #NCT01431326) Study; SCR, serum creatinine

**Supplementary Table 4.** Population demographics for pediatric subjects without obesity who received trimethoprim/sulfamethoxazole from the External Data Study to evaluate the pediatric PBPK model.

| <b>Demographics<sup>a</sup></b>  | <b>External Data Study (n=8)</b> |
|----------------------------------|----------------------------------|
| n, samples (TMP; SMX)            | 50; 50                           |
| Age, years                       | 7.1 (2.8, 13.4)                  |
| Age group                        |                                  |
| 2 ≤ and < 6 years                | 4 (50%)                          |
| 6 ≤ and < 12 years               | 1 (12.5%)                        |
| 12 ≤ and < 21 years              | 3 (37.5%)                        |
| Weight, kg                       | 25.3 (11.1, 53.1)                |
| Height, cm                       | 122.1 (80.0, 157.0)              |
| BMI, kg/m <sup>2</sup>           | 16.6 (13.9, 21.5)                |
| BMI percentile, %                | 56.0 (4.7, 82.3)                 |
| Extended BMI percentile, %       | 81.6 (58.0, 94.0)                |
| Male                             | 6 (75.0%)                        |
| Race                             |                                  |
| White                            | 7 (87.5%)                        |
| Black or African American        | 0 (0%)                           |
| Asian                            | 0 (0%)                           |
| American Indian/Alaskan Native   | 0 (0%)                           |
| Native Hawaiian/Pacific Islander | 1 (12.5%)                        |
| Multiple races                   | 0 (0%)                           |
| Unknown/Not reported             | 0 (0%)                           |
| Ethnicity                        |                                  |
| Hispanic/Latino                  | 0 (0%)                           |
| Not Hispanic/Latino              | 0 (0%)                           |
| Unknown/Not reported             | 4 (100%)                         |
| Albumin, g/dL                    | 3.75 (3.27, 4.10) [5]            |
| SCR, mg/dL                       | 0.37 (0.25, 0.57)                |

<sup>a</sup>Demographics recorded at the time of the first study dose were used to calculate descriptive statistics. Values are medians (range) [missing] for continuous variables and counts (%) for categorical variables. Extended BMI percentile is calculated as BMI divided by the 95<sup>th</sup> BMI percentile for a subject's age and sex, where children with an extended BMI percentile ≥ 100% are considered obese.

BMI, body mass index; SCR, serum creatinine; SMX, sulfamethoxazole; TMP, trimethoprim

**Supplementary Table 5.** Population demographics for pediatric subjects with obesity who received trimethoprim/sulfamethoxazole from the POP01 and External Data Study and combined dataset.

| <b>Demographics<sup>a</sup></b>  | <b>POP01 (n=46)</b>      | <b>External Data Study (n=4)</b> | <b>Combined (n=50)</b>   |
|----------------------------------|--------------------------|----------------------------------|--------------------------|
| n, samples (TMP; SMX)            | 62; 64                   | 25; 25                           | 87; 89                   |
| Age, years                       | 14.3 (2.1, 20.2)         | 11.2 (7.0, 14.7)                 | 14.0 (2.1, 20.2)         |
| Age group                        |                          |                                  |                          |
| 2 ≤ and < 6 years                | 4 (8.7%)                 | 0 (0%)                           | 4 (8.0%)                 |
| 6 ≤ and < 12 years               | 12 (26.1%)               | 3 (75.0%)                        | 15 (30.0%)               |
| 12 ≤ and < 21 years              | 30 (65.2%)               | 1 (25.0%)                        | 31 (62.0%)               |
| Weight, kg                       | 70.3 (12.6, 147.9)       | 53.6 (32.2, 65.4)                | 68.1 (12.6, 147.9)       |
| Height, cm                       | 156.1 (80.2, 190.0)      | 141.9 (124.2, 150.0)             | 155.0 (80.2, 190.0)      |
| BMI, kg/m <sup>2</sup>           | 30.3 (18.4, 46.1)        | 26.6 (20.9, 29.1)                | 29.4 (18.4, 46.1)        |
| BMI percentile, %                | 98.3 (83.0, 100.0)       | 96.9 (96.2, 98.6)                | 98.1 (83.0, 100.0)       |
| Extended BMI percentile, %       | 118.1 (100.3, 173.9)     | 105.9 (104.3, 121.6)             | 117.1 (100.3, 173.9)     |
| Male                             | 33 (71.7%)               | 2 (50.0%)                        | 35 (70.0%)               |
| Race                             |                          |                                  |                          |
| White                            | 31 (67.4%)               | 4 (100.0%)                       | 35 (70.0%)               |
| Black or African American        | 8 (17.4%)                | 0 (0%)                           | 8 (16.0%)                |
| Asian                            | 1 (2.2%)                 | 0 (0%)                           | 1 (2.0%)                 |
| American Indian/Alaskan Native   | 1 (2.2%)                 | 0 (0%)                           | 1 (2.0%)                 |
| Native Hawaiian/Pacific Islander | 2 (4.3%)                 | 0 (0%)                           | 2 (4.0%)                 |
| Multiple races                   | 2 (4.3%)                 | 0 (0%)                           | 2 (4.0%)                 |
| Unknown/Not reported             | 1 (2.2%)                 | 0 (0%)                           | 1 (2.0%)                 |
| Ethnicity                        |                          |                                  |                          |
| Hispanic/Latino                  | 5 (10.9%)                | 0 (0%)                           | 5 (10.0%)                |
| Not Hispanic/Latino              | 40 (87.0%)               | 0 (0%)                           | 40 (80.0%)               |
| Unknown/Not reported             | 1 (2.2%)                 | 4 (100%)                         | 5 (10.0%)                |
| SCR, mg/dL                       | 0.60 (0.20, 4.50)<br>[7] | 0.50 (0.40, 0.57)                | 0.60 (0.20, 4.50)<br>[7] |

<sup>a</sup>Demographics recorded at the time of the first study dose were used to calculate descriptive statistics. Values are medians (range) [missing] for continuous variables and counts (%) for categorical variables. Extended BMI percentile is calculated as BMI divided by the 95<sup>th</sup> BMI percentile for a subject's age and sex, where children with an extended BMI percentile ≥ 100% are considered obese.

BMI, body mass index; POP01, Pharmacokinetics of Understudied Drugs Administered to Children Per Standard of Care (ClinicalTrials.gov #NCT01431326) Study; SCR, serum creatinine; SMX, sulfamethoxazole; TMP, trimethoprim



**Supplementary Table 6.** Parameters used in clindamycin PBPK model development.

| Parameter                                  | Clindamycin phosphate        | Clindamycin              | Source                                    |
|--------------------------------------------|------------------------------|--------------------------|-------------------------------------------|
| <b>PHYSICOCHEMICAL PROPERTIES</b>          |                              |                          |                                           |
| Molecular weight, g/mol                    | 504.96                       | 424.98                   | Hornik et al [13]                         |
| Effective molecular weight, g/mol          | 482.96                       | 402.98                   | Hornik et al [13]                         |
| pKa value                                  | 6.78                         | 7.55                     | Hornik et al [13]                         |
| Compound type                              | base                         | base                     | Hornik et al [13]                         |
| Lipophilicity                              | 0.95                         | 2.16                     | Hornik et al [13]                         |
| Protein binding partner                    | AAG                          | AAG                      | Hornik et al [13]                         |
| Fraction unbound                           | 0.22                         | 0.06                     | Hornik et al [13]                         |
| Solubility, mg/L                           | 3,220                        | 30.6                     | Hornik et al [13]                         |
| Solubility reference pH                    | 7.0                          | 7.0                      | Hornik et al [13]                         |
| Solubility gain per charge                 | 1,000                        | 1,000                    | Hornik et al [13]                         |
| Blood to plasma ratio                      | 0.62                         | 0.61                     | Calculated value <sup>a</sup>             |
| <b>ABSORPTION</b>                          |                              |                          |                                           |
| Dissolution function                       | ---                          | Weibull                  | Optimized                                 |
| Dissolution time, min                      | ---                          | 71.69                    | Optimized                                 |
| Dissolution shape                          | ---                          | 0.92                     | Optimized                                 |
| Lag time, h                                | ---                          | 0                        | Optimized                                 |
| Specific intestinal permeability, cm/min   | 1.19e <sup>-7</sup>          | 6.73e <sup>-3</sup>      | Calculated value <sup>b</sup> / Optimized |
| Specific organ permeability, cm/min        | 2.02e <sup>-5</sup>          | 9.71e <sup>-4</sup>      | Calculated value <sup>c</sup>             |
| <b>DISTRIBUTION</b>                        |                              |                          |                                           |
| Partition coefficients                     | Rodgers & Rowland            | Rodgers & Rowland        | Literature [25]                           |
| Cellular permeabilities                    | PK-Sim <sup>®</sup> Standard | Charge dependent Schmidt | PK-Sim <sup>®</sup> algorithm             |
| <b>METABOLISM</b>                          |                              |                          |                                           |
| Alkaline phosphatase                       |                              |                          |                                           |
| Reference concentration, μmol/L            | 1.0                          | ---                      | Hornik et al [13]                         |
| CL <sub>int</sub> , L/min                  | 0.80                         | ---                      | Hornik et al [13]                         |
| CL <sub>spec</sub> , 1/min <sup>d</sup>    | 0.51                         | ---                      | Hornik et al [13]                         |
| CYP3A4                                     |                              |                          |                                           |
| Reference concentration, μmol/L            | ---                          | 4.32                     | Hornik et al [13]                         |
| CL <sub>int</sub> , μL/min/pmol CYP        | ---                          | 0.51                     | Hornik et al [13]                         |
| CYP3A5                                     |                              |                          |                                           |
| Reference concentration, μmol/L            | ---                          | 0.04                     | Hornik et al [13]                         |
| CL <sub>int</sub> , μL/min/pmol CYP        | ---                          | 7.00                     | Hornik et al [13]                         |
| <b>EXCRETION</b>                           |                              |                          |                                           |
| GFR fraction                               | 0.044                        | 1.0                      | Hornik et al [13]                         |
| Renal transporter                          |                              |                          |                                           |
| Reference concentration, μmol/L            | ---                          | 1.0                      | Hornik et al [13]                         |
| V <sub>max</sub> , μmol/L/min <sup>e</sup> | ---                          | 1,829.24                 | Hornik et al [13]                         |

|                |     |        |                   |
|----------------|-----|--------|-------------------|
| $K_m, \mu M^e$ | --- | 10,000 | Hornik et al [13] |
|----------------|-----|--------|-------------------|

<sup>a</sup> $[(f_{water\_rbc} + f_{lipids\_rbc} * 10^{logP} + f_{proteins\_rbc} * KProt) * f_u * HCT] - HCT + 1$ ; where  $f_{water\_rbc}$  is the fractional volume content of water in blood cells,  $f_{lipids\_rbc}$  is the fractional volume content of lipid in blood cells,  $logP$  is the lipophilicity measure,  $f_{proteins\_rbc}$  is the fractional volume content of protein in blood cells,  $KProt$  is partition coefficient of water to protein,  $f_u$  is the fraction unbound, and  $HCT$  is the hematocrit.

<sup>b</sup> $266 * (MW_{eff} * 10^9)^{-4.5} * 10^{logP} * 60 * 10^{-1}$ ; where  $MW_{eff}$  is the effective molecular weight and  $logP$  is the lipophilicity measure.

<sup>c</sup> $(\frac{MW_{eff} * 10^9}{336})^{-6} * \frac{10^{logP}}{5} * 10^{-5}$ ; where  $MW_{eff}$  is the effective molecular weight and  $logP$  is the lipophilicity measure.

<sup>d</sup> $CL_{spec}$  is a PK-Sim<sup>®</sup> software-specific term that is calculated by  $CL_{spec} = \frac{CL_{int}}{V * f_{cell}}$ ; where  $V$  is the volume of the liver and  $f_{cell}$  is the fraction intracellular in the liver.

<sup>e</sup>Note that these values, as inputted in PK-Sim<sup>®</sup>, are calculated for liver tissue.

AAG,  $\alpha 1$ -acid glycoprotein;  $CL_{int}$ , intrinsic clearance;  $CL_{spec}$ , specific clearance; CYP, cytochrome P450;  $K_m$ , concentration of half-maximal metabolism or transport; PBPK, physiologically-based pharmacokinetic; pKa, negative log of the acid dissociation constant;  $V_{max}$ , maximal rate of metabolism or transport

**Supplementary Table 7.** Parameters used in trimethoprim/sulfamethoxazole PBPK model development.

| Parameter                                  | Trimethoprim                 | Sulfamethoxazole             | Source                        |
|--------------------------------------------|------------------------------|------------------------------|-------------------------------|
| <b>PHYSICOCHEMICAL PROPERTIES</b>          |                              |                              |                               |
| Molecular weight, g/mol                    | 290.32                       | 253.28                       | Thompson et al [14]           |
| Effective molecular weight, g/mol          | 290.32                       | 253.28                       | Thompson et al [14]           |
| pKa value                                  | 7.3                          | 6.0                          | Thompson et al [14]           |
| Compound type                              | base                         | acid                         | Thompson et al [14]           |
| Lipophilicity                              | 1.36                         | 0.89                         | Thompson et al [14]           |
| Protein binding partner                    | albumin                      | albumin                      | Thompson et al [14]           |
| Fraction unbound                           | 0.56                         | 0.30                         | Thompson et al [14]           |
| Solubility, mg/L                           | 500                          | 700                          | Thompson et al [14]           |
| Solubility reference pH                    | 7.0                          | 7.0                          | Thompson et al [14]           |
| Solubility gain per charge                 | 1,000                        | 1,000                        | Thompson et al [14]           |
| Blood to plasma ratio                      | 0.79                         | 0.65                         | Calculated value <sup>a</sup> |
| <b>ABSORPTION</b>                          |                              |                              |                               |
| Dissolution function                       | Weibull                      | Weibull                      | Thompson et al [14]           |
| Dissolution time, min                      | 15                           | 20                           | Thompson et al [14]           |
| Dissolution shape                          | 0.77                         | 0.73                         | Thompson et al [14]           |
| Lag time, h                                | 0                            | 0                            | Optimized                     |
| Specific intestinal permeability, cm/min   | 5.9e <sup>-6</sup>           | 4.52e <sup>-5</sup>          | Thompson et al [14]           |
| Specific organ permeability, cm/min        | 1.11e <sup>-3</sup>          | 8.46e <sup>-4</sup>          | Calculated value <sup>b</sup> |
| <b>DISTRIBUTION</b>                        |                              |                              |                               |
| Partition coefficients                     | Rodgers & Rowland            | Rodgers & Rowland            | Literature [25]               |
| Cellular permeabilities                    | PK-Sim <sup>®</sup> Standard | PK-Sim <sup>®</sup> Standard | PK-Sim <sup>®</sup> algorithm |
| <b>METABOLISM</b>                          |                              |                              |                               |
| <b>CYP2C9</b>                              |                              |                              |                               |
| Reference concentration, μmol/L            | 3.84                         | 3.84                         | Thompson et al [14]           |
| CL <sub>int</sub> , mL/min                 | 4.19                         | 5.21                         | Thompson et al [14]           |
| CL <sub>spec</sub> , 1/min <sup>c</sup>    | 0.0027                       | 0.0033                       | Thompson et al [14]           |
| <b>CYP3A4</b>                              |                              |                              |                               |
| Reference concentration, μmol/L            | 4.32                         | ---                          | Thompson et al [14]           |
| CL <sub>int</sub> , mL/min                 | 4.19                         | ---                          | Thompson et al [14]           |
| CL <sub>spec</sub> , 1/min <sup>c</sup>    | 0.0027                       | ---                          | Thompson et al [14]           |
| <b>NAT2 (<i>unadjusted</i>)</b>            |                              |                              |                               |
| Reference concentration, μmol/L            | ---                          | 1.0                          | Thompson et al [14]           |
| CL <sub>int</sub> , mL/min                 | ---                          | 5.21                         | Thompson et al [14]           |
| CL <sub>spec</sub> , 1/min <sup>c</sup>    | ---                          | 0.0033                       | Thompson et al [14]           |
| <b>NAT2 (<i>adjusted with obesity</i>)</b> |                              |                              |                               |
| Reference concentration, μmol/L            | ---                          | 1.0                          | Thompson et al [14]           |
| CL <sub>int</sub> , mL/min                 | ---                          | 26.05                        | Chiney et al [26]             |

|                                            |         |        |                     |
|--------------------------------------------|---------|--------|---------------------|
| CL <sub>spec</sub> , l/min                 | ---     | 0.0165 | Chiney et al [26]   |
| <b>EXCRETION</b>                           |         |        |                     |
| GFR fraction                               | 1.0     | 0.117  | Thompson et al [14] |
| Renal transporter                          |         |        |                     |
| Reference concentration, μmol/L            | 1.0     | ---    | Thompson et al [14] |
| V <sub>max</sub> , μmol/L/min <sup>d</sup> | 1,306.6 | ---    | Thompson et al [14] |
| K <sub>m</sub> , μM <sup>d</sup>           | 10,000  | ---    | Thompson et al [14] |

<sup>a</sup> $[(f_{water\_rbc} + f_{lipids\_rbc} * 10^{logP} + f_{proteins\_rbc} * KProt) * f_u * HCT] - HCT + 1$ ; where  $f_{water\_rbc}$  is the fractional volume content of water in blood cells,  $f_{lipids\_rbc}$  is the fractional volume content of lipid in blood cells,  $logP$  is the lipophilicity measure,  $f_{proteins\_rbc}$  is the fractional volume content of protein in blood cells,  $KProt$  is partition coefficient of water to protein,  $f_u$  is the fraction unbound, and  $HCT$  is the hematocrit.

<sup>b</sup> $(\frac{MW_{eff} * 10^9}{336})^{-6} * \frac{10^{logP}}{5} * 10^{-5}$ ; where  $MW_{eff}$  is the effective molecular weight and  $logP$  is the lipophilicity measure.

<sup>c</sup>CL<sub>spec</sub> is a PK-Sim<sup>®</sup> software-specific term that is calculated by  $CL_{spec} = \frac{CL_{int}}{V * f_{cell}}$ ; where  $V$  is the volume of the liver and  $f_{cell}$  is the fraction intracellular in the liver.

<sup>d</sup>Note that these values, as inputted in PK-Sim<sup>®</sup>, are calculated for liver tissue.

CL<sub>int</sub>, intrinsic clearance; CL<sub>spec</sub>, specific clearance; CYP, cytochrome P450; K<sub>m</sub>, concentration of half-maximal metabolism or transport; NAT2, N-acetyl transferase 2; PBPK, physiologically-based pharmacokinetic; pKa, negative log of the acid dissociation constant; V<sub>max</sub>, maximal rate of metabolism or transport

**Supplementary Table 8.** Population demographics for virtual pediatric subjects with obesity who were used in dosing simulations for clindamycin and trimethoprim/sulfamethoxazole.

| <b>Demographics<sup>a</sup></b> | <b>Clindamycin Simulations</b> | <b>TMP/SMX Simulations</b> |
|---------------------------------|--------------------------------|----------------------------|
| Age, years                      | 9.1 (2.1, 18.0)                | 12.0 (2.0, 18.0)           |
| Age group                       |                                |                            |
| 2 ≤ and < 6 years               | 1,000 (33.3%)                  | 1,000 (50.0%) <sup>c</sup> |
| 6 ≤ and < 12 years              | 1,000 (33.3%)                  |                            |
| 12 ≤ and < 21 years             | 1,000 (33.3%)                  | 1,000 (50.0%)              |
| Weight, kg                      | 43.9 (12.1, 174.5)             | 61.9 (12.8, 174.5)         |
| Height, cm                      | 134.5 (77.1, 200.5)            | 78.1 (149.9, 200.5)        |
| BMI, kg/m <sup>2</sup>          | 24.5 (17.8, 74.3)              | 17.8 (27.1, 74.3)          |
| BMI percentile, %               | 97.8 (95.0, 100.0)             | 97.6 (95.0, 100.0)         |
| Extended BMI percentile, %      | 108.7 (100.0, 287.3)           | 109.1 (100.0, 287.3)       |
| Obesity Stage <sup>b</sup>      |                                |                            |
| Stage I                         | 2,340 (78.0%)                  | 1,555 (77.8%)              |
| Stage II                        | 491 (16.4%)                    | 332 (16.6%)                |
| Stage III                       | 169 (5.6%)                     | 113 (5.7%)                 |
| Male                            | 33 (71.7%)                     | 983 (49.2%)                |

<sup>a</sup>Values are medians (range) for continuous variables and counts (%) for categorical variables. Extended BMI percentile is calculated as BMI divided by the 95<sup>th</sup> BMI percentile for a subject's age and sex, where children with an extended BMI percentile ≥ 100% are considered obese.

<sup>b</sup>Obesity stages are defined by extended BMI percentiles of 100-120% (Stage I), 120-140% (Stage II), and >140% (Stage III).

<sup>c</sup>One thousand virtual subjects were generated for each age group for both clindamycin and TMP/SMX PBPK model simulations. For clindamycin, the age groups were >2-6 years, >6-12 years, and <12-18 years. For TMP/SMX, the age groups were >2-12 years and >12-18 years.

BMI, body mass index; SMX, sulfamethoxazole; TMP, trimethoprim

**Supplementary Table 9.** Summarized results from a comprehensive literature search for reported hematocrit values in children with obesity.

| <b>n, subjects</b> | <b>Age (y)</b> | <b>Males</b> | <b>Race</b> | <b>Weight (kg)</b> | <b>BMI (kg/m<sup>2</sup>)</b> | <b>Hematocrit (L/L)</b> | <b>Reference</b>    |
|--------------------|----------------|--------------|-------------|--------------------|-------------------------------|-------------------------|---------------------|
| 182                | 11.6 (2.9)     | 0%           | NR          | 72.1 (22.5)        | 30.7 (5.8)                    | 0.40 (0.02)             | Belo et al [27]     |
| 168                | 11.7 (2.9)     | 100%         | NR          | 76.2 (27.4)        | 30.5 (6.4)                    | 0.42 (0.03)             | Belo et al [27]     |
| 43                 | 11.0 (2.4)     | 65%          | NR          | NR                 | NR <sup>a</sup>               | 0.38 (0.03)             | Cacciari et al [28] |
| 43                 | 16.0 (1.1)     | 0%           | NR          | 126.2 (22.8)       | 46.0 (6.0)                    | 0.43 (0.03)             | Elhag et al [29]    |
| 36                 | 16.0 (1.1)     | 100%         | NR          | 126.2 (22.8)       | 46.0 (6.0)                    | 0.39 (0.03)             | Elhag et al [29]    |

Values are mean (standard deviation) unless otherwise noted.

<sup>a</sup>The study reported subjects with obesity, but did not report BMI directly.

BMI, body mass index; NR, not reported

**Supplementary Table 10.** Summarized results from a comprehensive literature search for reported albumin values in children with obesity.

| <b>n, subjects</b> | <b>Age (y)</b>          | <b>Males</b>    | <b>Race</b>                     | <b>Weight (kg)</b>     | <b>BMI (kg/m<sup>2</sup>)</b>  | <b>Albumin (g/L)</b>         | <b>Reference</b>        |
|--------------------|-------------------------|-----------------|---------------------------------|------------------------|--------------------------------|------------------------------|-------------------------|
| 230                | 10.1 (3.0) <sup>a</sup> | 57%             | Non-Hispanic White              | NR                     | 25.4 (23.1, 28.7) <sup>b</sup> | 4.9 (4.7, 50.5) <sup>b</sup> | Di Costanzo et al [30]  |
| 7                  | (10, 16) <sup>c</sup>   | 43%             | Non-Hispanic Black              | (85, 148) <sup>c</sup> | (34.2, 65.6) <sup>c</sup>      | 3.6 (3.3, 3.9) <sup>b</sup>  | Adelman et al [31]      |
| 1 <sup>d</sup>     | 10                      | 0%              | Non-Hispanic Black              | 94                     | 52                             | 3.3                          | Adelman et al [31]      |
| 1 <sup>d</sup>     | 16                      | 0%              | Non-Hispanic Black              | 164                    | 65.5                           | 3.6                          | Adelman et al [31]      |
| 1 <sup>d</sup>     | 14                      | 100%            | Non-Hispanic Black              | 85                     | 38                             | 3.9                          | Adelman et al [31]      |
| 1 <sup>d</sup>     | 15                      | 0%              | Non-Hispanic Black              | 148                    | 51.6                           | 3.7                          | Adelman et al [31]      |
| 1 <sup>d</sup>     | 16                      | 100%            | Non-Hispanic Black              | 141                    | 39                             | 3.6                          | Adelman et al [31]      |
| 1 <sup>d</sup>     | 16                      | 0%              | Non-Hispanic Black              | 105                    | 42.5                           | 3.6                          | Adelman et al [31]      |
| 1 <sup>d</sup>     | 16                      | 100%            | Non-Hispanic Black              | 103                    | 34.3                           | 3.8                          | Adelman et al [31]      |
| 47                 | 11.3 (2.7)              | 40%             | Egyptian                        | NR                     | NR <sup>e</sup>                | 3.5 (0.5)                    | Ahmed et al [32]        |
| 23                 | 10.6 (3.1)              | 39%             | Egyptian                        | NR                     | NR <sup>e</sup>                | 3.9 (0.2)                    | Ahmed et al [32]        |
| 21                 | (7, 9) <sup>c</sup>     | 52%             | Asian                           | NR                     | NR <sup>e</sup>                | 4.0 (0.2)                    | Wu et al [33]           |
| 42                 | 11.7 (3.1)              | 52%             | NR                              | 41.4 (17.7)            | 18.4 (3.9)                     | 3.8 (0.4)                    | White et al [34]        |
| 10                 | 16.3 (1.7)              | NR <sup>f</sup> | NR                              | 138.8                  | 51.7                           | 4.3 (0.3)                    | Velhote et al [35]      |
| 242                | 17.1 (1.6)              | 24%             | Non-Hispanic White              | NR                     | 50.5 (45.2, 58.3) <sup>b</sup> | 4.1 (0.3)                    | Xiao et al [36]         |
| 43                 | 11.0 (2.4)              | 65%             | NR                              | NR                     | NR <sup>e</sup>                | 4.4 (0.3)                    | Cacciari et al [37]     |
| 36                 | 17.5 (0.3)              | 44%             | Non-Hispanic White              | NR                     | 37.4 (1.2)                     | 4.3 (0.3)                    | Cohen et al [38]        |
| 36                 | 16.0 (1.1)              | 100%            | NR                              | 126.2 (22.8)           | 46.0 (6.0)                     | 4.1 (0.4)                    | Elhag et al [29]        |
| 43                 | 16.0 (1.1)              | 0%              | NR                              | 126.2 (22.8)           | 46.0 (6.0)                     | 4.1 (0.4)                    | Elhag et al [29]        |
| 22                 | (1, 21) <sup>c</sup>    | 36%             | Non-Hispanic Black              | NR                     | NR <sup>e</sup>                | 3.9 (0.8)                    | Abitbol et al [39]      |
| 22                 | (1, 21) <sup>c</sup>    | 50%             | Non-Hispanic Black              | NR                     | NR <sup>e</sup>                | 4.0 (0.5)                    | Abitbol et al [39]      |
| 8                  | 12.0 (2.5)              | NR <sup>f</sup> | NR                              | 82.8 (23.2)            | NR <sup>e</sup>                | 4.8 (0.2)                    | Widhalm et al [40]      |
| 242                | 17.1 <sup>g</sup>       | NR <sup>f</sup> | Non-Hispanic White              | NR                     | 50.5 (45.2, 58.3) <sup>b</sup> | 4.1 (3.9, 4.4) <sup>b</sup>  | Nehus et al [41]        |
| 65                 | 11.3 (2.8)              | 55%             | NR                              | NR                     | 27.3 (4.3)                     | 4.5 (0.3)                    | Cindik et al [42]       |
| 23                 | 13.3 (2.7)              | 48%             | Non-Hispanic Black <sup>g</sup> | NR                     | NR <sup>e</sup>                | 4.5 (0.3)                    | Alkhoury et al [43]     |
| 37                 | 14.6 (2.7)              | 51%             | Non-Hispanic White <sup>g</sup> | NR                     | NR <sup>e</sup>                | 4.4 (0.3)                    | Alkhoury et al [43]     |
| 8                  | 11.3 (2.7)              | 38%             | NR                              | NR                     | 26.2 (4.4)                     | 4.7 (0.3)                    | Del Chierico et al [44] |
| 27                 | 12.0 (2.8)              | 78%             | NR                              | NR                     | 26.5 (4.4)                     | 4.7 (0.2)                    | Del Chierico et al [44] |

|    |                                |     |          |                                 |                 |                  |                         |
|----|--------------------------------|-----|----------|---------------------------------|-----------------|------------------|-------------------------|
| 26 | 12.3 (2.5)                     | 42% | NR       | NR                              | 27.4 (6.5)      | 4.8 (0.2)        | Del Chierico et al [44] |
| 19 | 15.2 (1.5)                     | 89% | NR       | NR                              | 35.4 (6.0)      | 4.7 (0.3)        | Hudert et al [45]       |
| 17 | 14.5 (2.2)                     | 59% | NR       | NR                              | 36.7 (5.8)      | 4.6 (0.3)        | Hudert et al [45]       |
| 13 | 14.0 (2.4)                     | 85% | NR       | NR                              | 33.6 (6.9)      | 4.7 (0.3)        | Hudert et al [45]       |
| 18 | 12.8 (2.0)                     | 72% | NR       | NR                              | 32.6 (5.9)      | 4.6 (0.3)        | Hudert et al [45]       |
| 60 | 10.6 (2.7)                     | 33% | NR       | 71.9 (19.4)                     | 35.1 (4.6)      | 4.4 (0.4)        | Amin et al [46]         |
| 60 | 10.1 (3.5)                     | 40% | NR       | 64.0 (13.8)                     | 34.6 (7.8)      | 4.5 (0.4)        | Amin et al [46]         |
| 37 | 7.7 (3.3)                      | 46% | NR       | NR                              | NR <sup>e</sup> | 4.3 (0.2)        | El-Karakasy et al [47]  |
| 39 | 7.7 (3.3)                      | 54% | Egyptian | NR                              | NR <sup>e</sup> | 4.3 (0.2)        | El-Karakasy et al [47]  |
| 34 | 14.1 (11.0, 16.7) <sup>b</sup> | 41% | Egyptian | 78.0 (56.2, 123.9) <sup>b</sup> | NR <sup>e</sup> | 3.7 <sup>h</sup> | Gade et al [48]         |
| 36 | 14.4 (11.1, 17.7) <sup>b</sup> | 58% | NR       | 56.0 (33.2, 75.8) <sup>b</sup>  | NR <sup>e</sup> | 3.8 <sup>h</sup> | Gade et al [48]         |

Values are mean (standard deviation) unless otherwise noted.

<sup>a</sup>Reported as median (standard deviation).

<sup>b</sup>Reported as median (range).

<sup>c</sup>Reported as (range).

<sup>d</sup>Reported individual-level data.

<sup>e</sup>The study reported subjects with obesity, but did not report BMI directly.

<sup>f</sup>Includes both male and females subjects with an unreported ratio.

<sup>g</sup>Reported as the majority.

<sup>h</sup>Reported as mean.

BMI, body mass index; NR, not reported



**Supplementary Table 11.** Summarized results from a comprehensive literature search for reported AAG values in children with obesity.

| <b>n, subjects</b> | <b>Age (y)</b>                 | <b>Males</b>    | <b>Race</b> | <b>Weight (kg)</b>             | <b>BMI (kg/m<sup>2</sup>)</b> | <b>AAG (g/L)</b>               | <b>Reference</b>   |
|--------------------|--------------------------------|-----------------|-------------|--------------------------------|-------------------------------|--------------------------------|--------------------|
| 48                 | (3, 6) <sup>a</sup>            | NR <sup>b</sup> | Hispanic    | NR                             | NR <sup>c</sup>               | 1.05 (0.9, 1.3) <sup>d,e</sup> | Gibson et al [49]  |
| 876                | 14.9 (13.9, 16.0) <sup>d</sup> | 46%             | NR          | 57.3 (50.5, 64.9) <sup>d</sup> | NR <sup>c</sup>               | 0.8 (0.6, 1.1) <sup>d</sup>    | Ferrari et al [50] |

Values are mean (standard deviation) unless otherwise noted.

<sup>a</sup>Reported as range.

<sup>b</sup>Includes both male and females subjects with an unreported ratio.

<sup>c</sup>The study reported subjects with obesity, but did not report BMI directly.

<sup>d</sup>Reported as median (range).

<sup>e</sup>Reported in molar units and converted to mass units using a molecular weight of 42 kDa.

AAG,  $\alpha$ 1-acid glycoprotein; BMI, body mass index; NR, not reported

**Supplementary Table 12.** Organ volume scaling factors for virtual children with obesity.

| <b>Organ</b>       | <b>Mean Scaling Factor<sup>a</sup></b> | <b>Standard Deviation<sup>a</sup></b> |
|--------------------|----------------------------------------|---------------------------------------|
| Brain              | 104%                                   | 0.3%                                  |
| Bone               | 106%                                   | 0.5%                                  |
| Gonads             | 114%                                   | 2.6%                                  |
| Heart <sup>b</sup> | ---                                    | ---                                   |
| Kidneys            | 115%                                   | 2.6%                                  |
| Large Intestine    | 114%                                   | 2.6%                                  |
| Liver              | 115%                                   | 2.3%                                  |
| Lungs              | 114%                                   | 2.6%                                  |
| Muscle             | 115%                                   | 2.2%                                  |
| Pancreas           | 114%                                   | 2.6%                                  |
| Small Intestine    | 114%                                   | 2.6%                                  |
| Spleen             | 125%                                   | 8.8%                                  |
| Stomach            | 114%                                   | 2.6%                                  |

<sup>a</sup>Scaling factor mean and standard deviation were determined from organ volumes of adults with obesity and normal weight adults reported in Hwaung et al [51]. While scaling factors were derived from adults, they were assumed to be similar in children and validated with pediatric data when available (**Supplementary Table 13; Figure 2**)

<sup>b</sup>No significant increase in size with obesity reported.

**Supplementary Table 13.** Summarized results from a comprehensive literature search for kidney and liver sizes in children with and without obesity.

| n, subjects   | Age (y) | Measurement         | Nonobese (mm) <sup>a</sup> | Obese (mm) <sup>a</sup> | Obese/Nonobese (%) | Reference         |
|---------------|---------|---------------------|----------------------------|-------------------------|--------------------|-------------------|
| <b>KIDNEY</b> |         |                     |                            |                         |                    |                   |
| 22            | 2-4y    | Right kidney length | 6.7                        | 7.5                     | 112                | Konus et al [52]  |
| 26            | 4-6y    |                     | 7.4                        | 8.3                     | 112                |                   |
| 32            | 6-8y    |                     | 8.0                        | 9.1                     | 114                |                   |
| 27            | 8-10y   |                     | 8.0                        | 8.9                     | 111                |                   |
| 15            | 10-12y  |                     | 8.9                        | 10.0                    | 112                |                   |
| 22            | 12-14y  |                     | 9.4                        | 10.2                    | 109                |                   |
| 11            | 14-18y  |                     | 9.2                        | 10.2                    | 111                |                   |
| 133           | 2-4y    | Right kidney length | 6.4                        | 7.7                     | 120                | Otiv et al [53]   |
| 129           | 4-6y    |                     | 6.8                        | 8.0                     | 118                |                   |
| 102           | 6-8y    |                     | 7.0                        | 8.0                     | 114                |                   |
| 115           | 8-10y   |                     | 7.8                        | 9.1                     | 117                |                   |
| 75            | 10-12y  |                     | 8.3                        | 9.8                     | 118                |                   |
| 62            | 12-14y  |                     | 8.6                        | 10.2                    | 119                |                   |
| 28            | 2-3y    | Right kidney length | 6.8                        | 8.5                     | 125                | Coombs et al [54] |
| 24            | 3-4y    |                     | 7.3                        | 9.2                     | 126                |                   |
| 15            | 4-5y    |                     | 7.6                        | 9.4                     | 124                |                   |
| 21            | 5-6y    |                     | 7.7                        | 9.5                     | 123                |                   |
| 18            | 6-7y    |                     | 7.8                        | 9.8                     | 126                |                   |
| 26            | 7-8y    |                     | 8.1                        | 10.2                    | 126                |                   |
| 28            | 8-9y    |                     | 8.4                        | 10.6                    | 126                |                   |
| 39            | 9-10y   |                     | 8.7                        | 11.0                    | 126                |                   |
| 37            | 10-11y  |                     | 9.0                        | 11.2                    | 124                |                   |
| 43            | 11-12y  |                     | 9.2                        | 11.4                    | 124                |                   |
| 36            | 12-13y  |                     | 9.6                        | 11.6                    | 121                |                   |
| 38            | 13-14y  |                     | 10.0                       | 11.8                    | 118                |                   |
| 15            | 14-15y  |                     | 10.4                       | 11.8                    | 113                |                   |

|                       |         |                        |                   |                   |                      |                        |
|-----------------------|---------|------------------------|-------------------|-------------------|----------------------|------------------------|
| 17                    | 15-16y  |                        | 10.8              | 12.1              | 112                  |                        |
| 43                    | 2-4y    | Right kidney length    | 6.3               | 7.4               | 117                  | Thapa et al [55]       |
| 28                    | 4-6y    |                        | 7.0               | 8.0               | 115                  |                        |
| 38                    | 6-8y    |                        | 7.8               | 8.5               | 108                  |                        |
| 19                    | 8-10y   |                        | 8.3               | 9.5               | 115                  |                        |
| 11                    | 10-12y  |                        | 8.6               | 9.7               | 113                  |                        |
| 6397                  | 6y      | Combined kidney volume | 12.0              | 16.7              | 139                  | Bakker et al [56]      |
| 1748                  | 0.5-16y | Kidney volume          | 14.0 <sup>b</sup> | 17.0 <sup>b</sup> | 121                  | DiZazzo et al [57]     |
| 794                   | 0-18y   | Right kidney length    | 10.0              | 11.8              | 118                  | Kim et al [58]         |
| 950                   | >2y     | Kidney length          | 8.1               | 10.3              | 127                  | Mohtasib et al [59]    |
| 368                   | 5-18y   | Kidney length          | NR                | NR                | 110                  | Parmaksiz et al [60]   |
| 204                   | 1-19y   | Kidney length          | NR                | NR                | 105                  | Zuzuárregui et al [61] |
| 100                   | 1-19y   | Kidney length          | NR                | NR                | 106                  | Soheilipour et al [62] |
| 671                   | NR      | Kidney volume          | NR                | NR                | 125                  | Wang et al [63]        |
| <b>Median (range)</b> |         |                        |                   |                   | <b>118 (105-139)</b> |                        |
| <b>LIVER</b>          |         |                        |                   |                   |                      |                        |
| 27                    | 2-4y    | Liver length           | 8.6               | 10.5              | 122                  | Konus et al [52]       |
| 30                    | 4-6y    |                        | 10.0              | 12.4              | 124                  |                        |
| 38                    | 6-8y    |                        | 10.5              | 12.3              | 117                  |                        |
| 30                    | 8-10y   |                        | 10.5              | 12.8              | 122                  |                        |
| 16                    | 10-12y  |                        | 11.5              | 13.6              | 118                  |                        |
| 23                    | 12-14y  |                        | 11.8              | 13.6              | 115                  |                        |
| 12                    | 14-18y  |                        | 12.1              | 13.9              | 115                  |                        |
| 43                    | 2-4y    | Liver length           | 8.7               | 10.5              | 121                  | Thapa et al [53]       |
| 41                    | 4-6y    |                        | 9.2               | 10.7              | 116                  |                        |
| 25                    | 6-8y    |                        | 9.9               | 11.8              | 119                  |                        |
| 19                    | 10-12y  |                        | 10.6              | 12.7              | 119                  |                        |
| 11                    | 12-14y  |                        | 11.6              | 13.0              | 112                  |                        |
| 132                   | 2-4y    | Liver length           | 9.0               | 11.6              | 130                  | Dhingra et al [64]     |
| 115                   | 4-6y    |                        | 10.1              | 14.0              | 139                  |                        |
| 51                    | 6-8y    |                        | 10.9              | 12.8              | 118                  |                        |
| 62                    | 8-10y   |                        | 11.8              | 14.1              | 119                  |                        |

|                       |        |              |      |      |                      |                      |
|-----------------------|--------|--------------|------|------|----------------------|----------------------|
| 53                    | 10-12y |              | 13.3 | 15.4 | 116                  |                      |
| 48                    | 2-4y   | Liver length | 9.9  | 11.0 | 111                  | Da Rocha et al [65]  |
| 181                   | 4-6y   |              | 10.4 | 12.6 | 121                  |                      |
| 109                   | 6-8y   |              | 10.9 | 13.3 | 122                  |                      |
| 45                    | 4-6y   | Liver length | 9.2  | 10.8 | 117                  | Amatya et al [66]    |
| 45                    | 10-12y |              | 10.7 | 12.9 | 121                  |                      |
| 699                   | 0-19y  | Liver volume | NR   | NR   | 110                  | Cervantes et al [67] |
| <b>Median (range)</b> |        |              |      |      | <b>119 (110-139)</b> |                      |

<sup>a</sup>Units are cm for organ length measurements cm and cm<sup>3</sup> for organ volume measurements.

<sup>b</sup>Normalized by height, weight, age, and gender.

**Supplementary Table 14.** Summarized results from a comprehensive literature search for reported cardiac output values in children with obesity.

| n, subjects | Age (y)                        | Males           | Race               | Weight (kg)                     | BMI (kg/m <sup>2</sup> )       | Cardiac Output (L/min)      | Reference            |
|-------------|--------------------------------|-----------------|--------------------|---------------------------------|--------------------------------|-----------------------------|----------------------|
| 61          | 13.5 (2.7)                     | 46%             | Non-Hispanic White | 85.7 (20.8)                     | 30.8 (5.3)                     | 4.9 (1.3)                   | Mangner et al [68]   |
| 32          | 10.2 (3.0)                     | 47%             | NR                 | 52.1 (19.1)                     | NR <sup>a</sup>                | 4.9 (0.7)                   | Castro et al [69]    |
| 143         | 10.3 (2.7)                     | 56%             | NR                 | 59.0 (23.1)                     | NR <sup>a</sup>                | 5.2 (0.8)                   | Castro et al [69]    |
| 39          | 16.0 (12.0, 17.0) <sup>b</sup> | 44%             | NR                 | NR                              | NR <sup>a</sup>                | 5.5 (4.0, 6.6) <sup>b</sup> | Wójtowicz et al [70] |
| 45          | 15.0 (14.0, 16.0) <sup>b</sup> | 58%             | NR                 | NR                              | NR <sup>a</sup>                | 6.5 (5.0, 7.3) <sup>b</sup> | Wójtowicz et al [70] |
| 65          | 11.7 (2.9)                     | NR <sup>c</sup> | NR                 | 66.1 (18.1)                     | NR <sup>a</sup>                | 5.1 (1.5)                   | Özkan et al [71]     |
| 36          | 13.3 (7.9, 17.4) <sup>b</sup>  | 0%              | NR                 | 79.0 (38.0, 132.0) <sup>b</sup> | 31.5 (22.3, 43.7) <sup>b</sup> | 5.1 (1.2)                   | Rauch et al [72]     |
| 28          | 12.3 (8.5, 17.6) <sup>b</sup>  | 100%            | NR                 | 77.0 (46.0, 155.0) <sup>b</sup> | 29.9 (23.7, 50.0) <sup>b</sup> | 5.3 (1.2)                   | Rauch et al [72]     |
| 10          | 11.7 (0.6)                     | 100%            | NR                 | 54.2 (6.7)                      | 23.3 (1.8)                     | 4.4 (1.1)                   | Schuster et al [73]  |
| 8           | 11.4 (1.0)                     | 100%            | NR                 | 74.0 (13.9)                     | 29.0 (2.0)                     | 5.4 (1.7)                   | Schuster et al [73]  |
| 24          | 11.9 (2.1)                     | 79%             | NR                 | NR                              | 32.4 (5.8)                     | 7.3 (1.9)                   | Giordano et al [74]  |
| 34          | 9.4 (0.15) <sup>d</sup>        | NR <sup>c</sup> | Non-Hispanic White | 51.7 (2.2) <sup>d</sup>         | NR <sup>a</sup>                | 5.3 (0.19) <sup>d</sup>     | Humphries et al [75] |
| 53          | 9.4 (0.13) <sup>d</sup>        | 0%              | NR                 | 54.6 (1.9) <sup>d</sup>         | NR <sup>a</sup>                | 5.1 (0.16) <sup>d</sup>     | Humphries et al [75] |
| 44          | 9.6 (0.15) <sup>d</sup>        | NR <sup>c</sup> | Non-Hispanic Black | 62.7 (2.9) <sup>d</sup>         | NR <sup>a</sup>                | 5.5 (0.24) <sup>d</sup>     | Humphries et al [75] |
| 25          | 9.8 (0.19) <sup>d</sup>        | 100%            | NR                 | 64.9 (4.6) <sup>d</sup>         | NR <sup>a</sup>                | 6.1 (0.32) <sup>d</sup>     | Humphries et al [75] |
| 120         | 12.0 (4.0)                     | 51%             | NR                 | 69.0 (25.0)                     | 28.0 (5.0)                     | 6.2 (1.2)                   | McGavock et al [76]  |
| 10          | 15 (0.4) <sup>d</sup>          | 0%              | NR                 | 83.1 (4.6) <sup>d</sup>         | 31.1 (1.6) <sup>d</sup>        | 4.7 <sup>e</sup>            | Gusso et al [77]     |

Values are mean (standard deviation) unless otherwise noted.

<sup>a</sup>The study reported subjects with obesity, but did not report BMI directly.

<sup>b</sup>Reported as median (range).

<sup>c</sup>Includes both male and females subjects with an unreported ratio.

<sup>d</sup>Reported as mean (standard error).

<sup>c</sup>Reported as mean.

BMI, body mass index; NR, not reported

**Supplementary Table 15.** Search terms used in PubMed for the comprehensive literature search for physiological data to inform development of the virtual population of children with obesity.

|                                                                                                                                                                                                                                                                                                                                                                                                                                                                                                                         |                                                                                                                                                                                                                                                                                                                                                                                                                                                                                                                                           |
|-------------------------------------------------------------------------------------------------------------------------------------------------------------------------------------------------------------------------------------------------------------------------------------------------------------------------------------------------------------------------------------------------------------------------------------------------------------------------------------------------------------------------|-------------------------------------------------------------------------------------------------------------------------------------------------------------------------------------------------------------------------------------------------------------------------------------------------------------------------------------------------------------------------------------------------------------------------------------------------------------------------------------------------------------------------------------------|
| <b>Search phrase for ‘obesity’</b>                                                                                                                                                                                                                                                                                                                                                                                                                                                                                      |                                                                                                                                                                                                                                                                                                                                                                                                                                                                                                                                           |
| "pediatric obesity"[MeSH] OR "obesity"[MeSH] OR "obesity, abdominal"[MeSH] OR "obesity, morbid"[MeSH] OR "obesity, metabolically benign"[MeSH] OR "fat"[MeSH] OR "adipose"[MeSH]                                                                                                                                                                                                                                                                                                                                        |                                                                                                                                                                                                                                                                                                                                                                                                                                                                                                                                           |
| <b>AND search phrase for ‘pediatric’</b>                                                                                                                                                                                                                                                                                                                                                                                                                                                                                |                                                                                                                                                                                                                                                                                                                                                                                                                                                                                                                                           |
| "pediatrics"[MeSH] OR "infant"[MeSH] OR "newborn"[MeSH] OR "pediatric"[Title/Abstract] OR "infant"[Title/Abstract] OR "newborn"[Title/Abstract] OR "neonates"[Title/Abstract] OR "neonate"[Title/Abstract] OR "infants"[Title/Abstract] OR "child"[MeSH] OR "juvenile"[MeSH] NOT "pregnant"[MeSH] OR "children"[Title/Abstract] OR "adolescent"[Title/Abstract] OR "adolescents"[Title/Abstract] OR "Adolescent"[MeSH]                                                                                                  |                                                                                                                                                                                                                                                                                                                                                                                                                                                                                                                                           |
| <b>AND each of the physiological terms below<sup>a</sup></b>                                                                                                                                                                                                                                                                                                                                                                                                                                                            |                                                                                                                                                                                                                                                                                                                                                                                                                                                                                                                                           |
| <p> “AAG”[MeSH]<br/> “absorption”[MeSH]<br/> “adipose”[MeSH]<br/> “age”[MeSH]<br/> “albumin”[MeSH]<br/> “alpha-1 acid glycoprotein”[MeSH]<br/> “anatomy”[MeSH]<br/> “anthropometric”[MeSH]<br/> “arterial blood”[MeSH]<br/> “autopsy”[MeSH]<br/> “blood”[MeSH]<br/> “blood circulation”[MeSH]<br/> “blood flow”[MeSH]<br/> “blood vessels”[MeSH]<br/> “body weight”[MeSH]<br/> “bone”[MeSH]<br/> “bone mass”[MeSH]<br/> “brain”[MeSH]<br/> “CACO-2”[MeSH]<br/> “cardiac output”[MeSH]<br/> “central fatness”[MeSH] </p> | <p> “low extraction”[MeSH]<br/> “metabolism”[MeSH]<br/> “microsome”[MeSH]<br/> “MPPGL”[MeSH]<br/> “mucosal blood flow”[MeSH]<br/> “muscle”[MeSH]<br/> “muscle mass”[MeSH]<br/> “ontogeny”[MeSH]<br/> “organ growth”[MeSH]<br/> “organ volume”[MeSH]<br/> “organ weight”[MeSH]<br/> “oxygen uptake”[MeSH]<br/> “PAH”[MeSH]<br/> “pancreas”[MeSH]<br/> “para-aminohippuric acid”[MeSH]<br/> “partition”[MeSH]<br/> “perfusion”[MeSH]<br/> “peripheral fatness”[MeSH]<br/> “permeability”[MeSH]<br/> “pH”[MeSH]<br/> “physiology”[MeSH] </p> |



|                                    |                               |
|------------------------------------|-------------------------------|
| “compartment”[MeSH]                | “plasma”[MeSH]                |
| “composition”[MeSH]                | “plasma proteins”[MeSH]       |
| “creatinine clearance”[MeSH]       | “portal vein”[MeSH]           |
| “drug metabolism”[MeSH]            | “post-mortal”[MeSH]           |
| “duodenum”[MeSH]                   | “postmortem”[MeSH]            |
| “ejection fraction”[MeSH]          | “pre-portal organs”[MeSH]     |
| “enzyme”[MeSH]                     | “pressure”[MeSH]              |
| “extracellular”[MeSH]              | “protein”[MeSH]               |
| “extracellular water”[MeSH]        | “protein binding”[MeSH]       |
| “fat depots”[MeSH]                 | “red blood cells”[MeSH]       |
| “filtering capacity”[MeSH]         | “renal”[MeSH]                 |
| “gastrointestinal tract”[MeSH]     | “respiration”[MeSH]           |
| “glomerular filtration rate”[MeSH] | “rheological profile”[MeSH]   |
| “glomerulus”[MeSH]                 | “serum”[MeSH]                 |
| “gonads”[MeSH]                     | “sex”[MeSH]                   |
| “growth rate”[MeSH]                | “skin”[MeSH]                  |
| “gut wall”[MeSH]                   | “small intestine”[MeSH]       |
| “haematocrit”[MeSH]                | “splanchnic blood flow”[MeSH] |
| “heart”[MeSH]                      | “spleen”[MeSH]                |
| “heart rate”[MeSH]                 | “stomach”[MeSH]               |
| “height”[MeSH]                     | “stroke volume”[MeSH]         |
| “hematocrit”[MeSH]                 | “subcutaneous”[MeSH]          |
| “hemodynamic”[MeSH]                | “surface area”[MeSH]          |
| “hemoglobin”[MeSH]                 | “tissue volume”[MeSH]         |
| “hepatic”[MeSH]                    | “tissue weight”[MeSH]         |
| “hepatocellularity”[MeSH]          | “total blood volume” [MeSH]   |
| “hepatocyte”[MeSH]                 | “total body lipid”[MeSH]      |
| “high extraction”[MeSH]            | “total body water”[MeSH]      |
| “HPGL”[MeSH]                       | “transporter”[MeSH]           |
| “hydrodynamics”[MeSH]              | “tubular reabsorption”[MeSH]  |
| “ileum”[MeSH]                      | “tubular secretion”[MeSH]     |
| “interstitial”[MeSH]               | “vascular”[MeSH]              |
| “intracellular”[MeSH]              | “vasculature”[MeSH]           |
| “jejunum”[MeSH]                    | “venous blood”[MeSH]          |
| “kidneys”[MeSH]                    | “ventilation”[MeSH]           |
| “kidney volume”[MeSH]              | “ventricular output”[MeSH]    |
| “large intestine”[MeSH]            | “villous blood flow”[MeSH]    |
| “lipid”[MeSH]                      | “water”[MeSH]                 |
| “liver”[MeSH]                      | “well-stirred”[MeSH]          |
| “liver volume”[MeSH]               |                               |

<sup>a</sup>Note that separate search was conducted for each of the key physiological terms, and the results were combined.

AAG,  $\alpha$ 1-acid glycoprotein; CACO-2, HPGL, hepatocytes per gram of liver; MeSH, medical subject headings; MPPGL, microsomal protein per gram of liver; PAH, para-aminohippuric acid

**Supplementary Table 16.** Population demographics and PBPK model simulation results for adult subjects who received PO doses of clindamycin hydrochloride.

| <b>Demographics<sup>a</sup></b>                       | <b>Value</b>                                 |
|-------------------------------------------------------|----------------------------------------------|
| <b>Al-Talla et al (2011) [15]</b>                     |                                              |
| Patient population                                    | healthy adults                               |
| n                                                     | 24                                           |
| Age, y                                                | 28.8 (7.7) [19-45]                           |
| Weight, kg                                            | 75.6 (11.0) [58-101]                         |
| Male                                                  | 24 (100%)                                    |
| PO dose, mg                                           | 150                                          |
| Formulation                                           | capsule                                      |
| AFE                                                   | 0.50                                         |
| <b>Bouazza et al (2012) [16]</b>                      |                                              |
| Patient population                                    | healthy adults                               |
| n                                                     | 50                                           |
| Age, y                                                | 58.7 (3.0) [18-93]                           |
| Weight, kg                                            | 69.9 (2.7) [23-133]                          |
| Male                                                  | 30 (60%)                                     |
| PO dose, mg                                           | 600                                          |
| Formulation                                           | tablet                                       |
| AFE                                                   | 0.75                                         |
| <b>del Carmen Carrasco-Portugal et al (2008) [17]</b> |                                              |
| Health status                                         | healthy adults                               |
| n                                                     | 24                                           |
| Age, y <sup>b</sup>                                   | 25.45 (1.66), males<br>21.46 (0.70), females |
| Weight, kg <sup>b</sup>                               | 68.77 (3.41), males<br>59.31 (1.88), females |
| Male                                                  | 11 (46%)                                     |
| PO dose, mg                                           | 600                                          |
| Formulation                                           | capsule                                      |
| AFE                                                   | 1.02                                         |
| <b>Gatti et al (1993) [18]</b>                        |                                              |
| Patient population                                    | healthy adults                               |
| n                                                     | 16                                           |
| Age, y                                                | 27.1 (3.9)                                   |
| Weight, kg                                            | 73.0 (12.7)                                  |
| Male                                                  | 16 (100%)                                    |
| PO dose, mg                                           | 600                                          |
| Formulation                                           | capsule                                      |
| AFE                                                   | 0.73                                         |
| <b>Li et al (2008) [19]</b>                           |                                              |
| Patient population                                    | healthy adults                               |
| n                                                     | 24                                           |

|                                |                                                                      |
|--------------------------------|----------------------------------------------------------------------|
| Age, y                         | 23.67 (2.16)                                                         |
| Weight, kg                     | 64.33 (4.57)                                                         |
| Male                           | 24 (100%)                                                            |
| PO dose, mg                    | 300                                                                  |
| Formulation                    | capsule                                                              |
| AFE                            | 0.85                                                                 |
| Mazur et al (1999) [20]        |                                                                      |
| Patient population             | healthy adults                                                       |
| n                              | 20                                                                   |
| Age, y                         | 29.0 [22-39]                                                         |
| Weight, kg                     | 80.0 [66-90]                                                         |
| Male                           | 20 (100%)                                                            |
| PO dose, mg                    | 600                                                                  |
| Formulation                    | tablet & capsule                                                     |
| AFE                            | 2.23                                                                 |
| Na-Bangchang et al (2007) [21] |                                                                      |
| Patient population             | Adults with acute uncomplicated <i>Plasmodium falciparum</i> malaria |
| n                              | 18                                                                   |
| Age, y <sup>c</sup>            | 29 [18-48]                                                           |
| Weight, kg <sup>c</sup>        | 56 [40-75]                                                           |
| Male                           | 13 (72%)                                                             |
| PO dose, mg                    | 600 (multidose)                                                      |
| Formulation                    | capsule                                                              |
| AFE                            | 0.87                                                                 |

<sup>a</sup>Age and weight presented as mean (standard deviation) [range] when available. Male presented as n (%).

<sup>b</sup>Standard error of the mean

<sup>c</sup>Geometric mean

AFE, average fold error; PBPK, physiologically-based pharmacokinetic; PO, oral

## 5 REFERENCES

1. Kuczmarski RJ, Ogden CL, Guo SS, Grummer-Strawn LM, Flegal KM, Mei Z, et al. 2000 CDC growth charts for the United States: Methods and development. National Center for Health Statistics. *Vital Heal. Stat.* 2000.
2. Correia-Costa L, Schaefer F, Afonso AC, Bustorff M, Guimarães JT, Guerra A, et al. Normalization of glomerular filtration rate in obese children. *Pediatr Nephrol.* 2016;31:1321–8.
3. Zappitelli M, Parvex P, Joseph L, Paradis G, Grey V, Lau S, et al. Derivation and validation of cystatin C-based prediction equations for GFR in children. *Am J Kidney Dis.* 2006;48:221–30.
4. Schwartz GJ, Muñoz A, Schneider MF, Mak RH, Kaskel F, Warady BA, et al. New equations to estimate GFR in children with CKD. *J Am Soc Nephrol.* 2009;20:629–37.
5. Peters AM, Snelling HLR, Glass DM, Bird NJ. Estimation of lean body mass in children. *Br J Anaesth.* 2011;106(5):719-23.
6. Al-Sallami HS, Goulding A, Grant A, Taylor R, Holford N, Duffull SB. Prediction of fat-free mass in children. *Clin Pharmacokinet.* 2015;54:1169–78.
7. Haycock GB, Schwartz GJ, Wisotsky DH. Geometric method for measuring body surface area: A height-weight formula validated in infants, children, and adults. *J Ped.* 1978;93(1):62-6.
8. Schaeffer F, Georgi M, Zieger A, Schärer K. Usefulness of bioelectric impedance and skinfold measurements in predicting fat-free mass derived from total body potassium in children. *Ped Res.* 1994;35(5):617-24.
9. Autmizguine J, Melloni C, Hornik CP, Dallefeld S, Harper B, Yogev R, et al. Population pharmacokinetics of trimethoprim-sulfamethoxazole in infants and children. *Antimicrob Agents Chemother.* 2018;62:1–19.
10. Madsen K, Nielson H, Tingleff O. *Methods for Non-Linear Least Squares Problems.* Tech. Univ. Denamrk. 2004.
11. McNamara PJ, Alcorn J. Protein binding predictions in infants. *AAPS PharmSci.* 2002;4:E4.
12. Blain PG, Mucklow JC, Rawlins MD, Roberts DF, Routledge PA, Shand DG. Determinants of plasma  $\alpha$ 1-acid glycoprotein (AAG) concentrations in health. *Br J Pharmacol.* 1985;20:500–2.
13. Hornik CP, Wu H, Edginton AN, Watt K, Cohen-Wolkowicz M, Gonzalez D. Development of a pediatric physiologically-based pharmacokinetic model of clindamycin using opportunistic pharmacokinetic data. *Clin Pharmacokinet.* 2017;56:1343–53.
14. Thompson EJ, Wu H, Maharaj A, Edginton AN, Balevic SJ, Cobbaert M, et al. Physiologically based pharmacokinetic modeling for trimethoprim and sulfamethoxazole in children. *Clin Pharmacokinet.* 2019;58:887–98.
15. Al-Talla ZA, Akrawi SH, Emwas AHM. Solid state NMR and bioequivalence comparison of the pharmacokinetic parameters of two formulations of clindamycin. *Int J Clin Pharmacol Ther.* 2011;49:469-76.
16. Bouazza N, Pestre V, Jullien V, Curis E, Urien S, Salmon D, Tréluet JM. Population pharmacokinetics of clindamycin orally and intravenously administered in patients with osteomyelitis. *Br J Clin Pharmacol.* 2012;74:971-7.

17. del Carmen Carrasco-Portugal M, Luján M, Flores-Murrieta J. Evaluation of gender in the oral pharmacokinetics of clindamycin in humans. *Biopharm Drug Disp.* 2008;29:427-30.
18. Gatti G, Flaherty J, Bubp J, White J, Borin M, Gambertoglio J. Comparative study of bioavailabilities and pharmacokinetics of clindamycin in healthy volunteers and patients with AIDS. *Antimicrob Agents Chemother.* 1993;37:1137-43.
19. Li J, Wang N, Zhang ZJ, Tian Y, Tang W, Chen Y. Pharmacokinetics and bioequivalence study of clindamycin hydrochloride formulations after single-dose administration in healthy Chinese male volunteers. *Drug Research.* 2008;58:358-62.
20. Mazur D, Schug BS, Evers G, Larsimont V, Fieger-Büschges H, Gimbel W, Keilback-Bermann, Blume HH. Bioavailability and selected pharmacokinetic parameters of clindamycin hydrochloride after administration of a new 600 mg tablet formulation. *Int J Clin Pharmacol Ther.* 1999;37:386-92.
21. Na-Bangchang K, Ruengweerayut R, Karbwang J, Chauemung A, Hutchinson D. Pharmacokinetics and pharmacodynamics of fosmidomycin monotherapy and combination therapy with clindamycin in the treatment of multidrug resistant falciparum malaria. *Malaria J.* 2007;6:1-10.
22. Gonzalez D, Melloni C, Yogev R, Poindexter BB, Mendley SR, Delmore P, et al. Use of opportunistic clinical data and a population pharmacokinetic model to support dosing of clindamycin for premature infants to adolescents. *Clin Pharmacol Ther.* 2014;96:429-37.
23. Smith MJ, Gonzalez D, Goldman JL, Yogev R, Sullivan JE, Reed MD, et al. Pharmacokinetics of clindamycin in obese and nonobese children. *Antimicrob Agents Chemother.* 2017;61:1-12.
24. Wu YSS, Cohen-Wolkowicz M, Hornik CP, Gerhart JG, Autmizguine J, Cobbaert M, et al. External evaluation of two pediatric population pharmacokinetics models of oral trimethoprim and sulfamethoxazole. *Antimicrob Agents Chemother.* 2021. [Published online ahead of print.]
25. Rodgers T, Rowland M. Physiologically based pharmacokinetic modelling 2: Predicting the tissue distribution of acids, very weak bases, neutrals and zwitterions. *Int J Drug Dev Res.* 2006;95:1238-57.
26. Chiney MS, Schwarzenberg SJ, Johnson LA. Altered xanthine oxidase and N-acetyltransferase activity in obese children. *Br J Clin Pharmacol.* 2011;72:109-15.
27. Belo L, Nascimento H, Kohlova M, Bronze-da-Rocha E, Fernandes J, Costa E, et al. Body fat percentage is a major determinant of total bilirubin independently of UGT1A1\*28 polymorphism in young obese. *PLoS One.* 2014;9(6):e98467.
28. Cacciari E, Balsamo A, Palareti G, Cassio A, Argento R, Poggi M, et al. Haemorheologic and fibrinolytic evaluation in obese children and adolescents. *Eur J Pediatr.* 1988;147(4):381-4.
29. Elhag W, El Ansari W, Abdulrazzaq S, Abdullah A, Elsherif M, Elgenaied I. Evolution of 29 anthropometric, nutritional, and cardiometabolic parameters among morbidly obese adolescents 2 years post sleeve gastrectomy. *Obes Surg.* 2018;28(2):474-82.
30. Di Costanzo A, Pacifico L, Chiesa C, Massimo Perla F, Ceci F, Angeloni A, et al. Genetic and metabolic predictors of hepatic fat content in a cohort of Italian children with obesity. *Pediatr Res.* 2019;85(5):671-7.
31. Adelman RD, Restaino IG, Alon US, Blowey DL. Proteinuria and focal segmental glomerulosclerosis in severely obese adolescents. *J Pediatr.* 2001;138(4):481-5.

32. Ahmed AM, Ghany MA, Hakeem GLA, Kamal A, Khattab R, Abdalla A, et al. Assessment of vitamin D status in a group of Egyptian children with non alcoholic fatty liver disease (multicenter study). *Nutr Metab (Lond)*. 2016;13:53.
33. Wu Y, Yue B, Liu J. Lipopolysaccharide-induced cytokine expression pattern in peripheral blood mononuclear cells in childhood obesity. *Mol Med Rep*. 2016;14(6):5281-7.
34. White M, Davies P, Murphy A. Correlation between nutrition assessment data and percent body fat via plethysmography in pediatric oncology patients. *J Parenter Enteral Nutr*. 2011;35(6):715-22.
35. Velhote MCP, Damiani D. Bariatric surgery in adolescents: Preliminary 1-year results with a novel technique (Santorio III). *Obes Surg*. 2010;20(12):1710-5.
36. Xiao N, Jenkins TM, Nehus E, Inge TH, Michalsky MP, Harmon CM, et al. Kidney function in severely obese adolescents undergoing bariatric surgery. *Obesity (Silver Spring)*. 2014;22(11):2319-25.
37. Cacciari E, Balsamo A, Palareti G, Cassio A, Argento R, Poggi M, et al. Haemorrhagic and fibrinolytic evaluation in obese children and adolescents. *Eur J Pediatr*. 1988;147(4):381-4.
38. Cohen JJ, Maayan L, Convit A. Preliminary evidence for obesity-associated insulin resistance in adolescents without elevations of inflammatory cytokines. *Diabetol Metab Syndr*. 2012;4(1):26.
39. Abitbol CL, Chandar J, Rodríguez MM, Berho M, Seeherunvong W, Freundlich M, et al. Obesity and preterm birth: Additive risks in the progression of kidney disease in children. *Pediatr Nephrol*. 2009;24(7):1363-70.
40. Widhalm KM, Zwiauer KF. Metabolic effects of a very low calorie diet in obese children and adolescents with special reference to nitrogen balance. *J Am Coll Nutr*. 1987;6(6):467-74.
41. Nehus EJ, Khoury JC, Inge TH, Xiao N, Jenkins TM, Moxey-Mims MM, et al. Kidney outcomes three years after bariatric surgery in severely obese adolescents. *Kidney Int*. 2017;91(2):451-8.
42. Cindik N, Baskin E, Agras PI, Kinik ST, Turan M, Saatci U. Effect of obesity on inflammatory markers and renal functions. *Acta Paediatr*. 2005;94(12):1732-7.
43. Alkhouri N, Cikach F, Eng K, Moses J, Patel N, Yan C, et al. Analysis of breath volatile organic compounds as a noninvasive tool to diagnose nonalcoholic fatty liver disease in children. *Eur J Gastroenterol Hepatol*. 2014;26(1):82-7.
44. Del Chierico F, Nobili V, Vernocchi P, Russo A, De Stefanis C, Gnani D, et al. Gut microbiota profiling of pediatric nonalcoholic fatty liver disease and obese patients unveiled by an integrated meta-omics-based approach. *Hepatology*. 2017;65(2):451-64.
45. Hudert CA, Tzschätzsch H, Guo J, Rudolph B, Bläker H, Loddenkemper C, et al. US time-harmonic elastography: Detection of liver fibrosis in adolescents with extreme obesity with nonalcoholic fatty liver disease. *Radiology*. 2018;288(1):99-106.
46. Amin S, El Amrousy D, Elrifayy S, Gamal R, Hodeib H. Serum osteocalcin levels in children with nonalcoholic fatty liver disease. *J Pediatr Gastroenterol Nutr*. 2018;66(1):117-21.
47. El-Karakasy HM, El-Koofy NM, Anwar GM, El-Mougy FM, El-Hennawy A, Fahmy ME. Predictors of non-alcoholic fatty liver disease in obese and overweight Egyptian children: Single center study. *Saudi J Gastroenterol*. 2011;17(1):40-6.

48. Gade C, Dalhoff K, Petersen TS, Riis T, Schmeltz C, Chabanova E, et al. Higher chlorzoxazone clearance in obese children compared with nonobese peers. *Br J Pharmacol*. 2018;84(8):1738-47.
49. Gibson RS, Bailey KB, Williams S, Houghton L, Costa-Ribeiro HC, Mattos AP, et al. Tissue iron deficiency and adiposity-related inflammation in disadvantaged preschoolers from NE Brazil. *Eur J Clin Nutr*. 2014;68(8):887-91.
50. Ferrari M, Cuenca-García M, Valtueña J, Moreno LA, Censi L, González-Gross M, et al. Inflammation profile in overweight/obese adolescents in Europe: An analysis in relation to iron status. *Eur J Clin Nutr*. 2015;69(2):247-55.
51. Hwaung P, Bosity-Westphal A, Muller MJ, Geisler C, Heo M, Thomas DM, et al. Obesity tissue: Composition, energy expenditure, and energy content in adult humans. *Obesity (Silver Spring)*. 2019;27(9):1472-81.
52. Konuş OL, Ozdemir A, Akkaya A, Erbaş G, Celik H, Işık S. Normal liver, spleen, and kidney dimensions in neonates, infants, and children, Evaluation with sonography. *AJR Am J Roentgenol*. 1998;171:1693-8.
53. Otiv A, Mehta K, Ali U, Nadkarni M. Sonographic measurement of renal size in normal Indian children. *Indian Pediatr*. 2012;49:533-6.
54. Coombs PR, Lavender I, Leung MYZ, Woods JC, Paul E, Webb N, et al. Normal sonographic renal length measurements in an Australian pediatric population. *Pediatr Radiol*. 2019;49:1754-61.
55. Thapa NB, Shah S, Pradhan A, Rijal K, Pradhan A, Basnet S. Sonographic assessment of the normal dimensions of liver, spleen, and kidney in healthy children at tertiary care hospital. *Kathmandu Univ Med J*. 2016;13:286-91.
56. Bakkar H, Kooijman MN, van der Heijden AJ, Hofman A, Franco OH, Taal HR, et al. Kidney size and function in a multi-ethnic population-based cohort of school-age children. *Pediatr Nephrol*. 2014;29:1589-98.
57. Di Zazzo G, Stringini G, Matteucci MC, Muraca M, Malena S, Emma F. Serum creatinine levels are significantly influenced by renal size in the normal pediatric population. *Clin J Am Soc Nephrol*. 2011;6(1):107-13.
58. Kim JH, Kim MJ, Lim SH, Kim J, Lee MJ. Length and volume of morphologically normal kidneys in Korean children: Ultrasound measurement and estimation using body size. *Korean J Imaging*. 2013;14(4):677-82.
59. Mohtasib RS, Alshamiri KM, Jobeir AA, Saidi FMA, Masawi AM, Alabdulaziz LS, et al. Sonographic measurements for kidney length in normal Saudi children: Correlation with other body parameters. *Ann Saudi Med*. 2019;39(3):143-54.
60. Parmaksiz G, Kekeç ŞD, Cengiz ND, Noyan A. The relationship between body mass index and renal length in obese children. *Pediatr Nephrol*. 2020;35(5):901-5.
61. Zuzuárregui JRP, Mallios R, Murphy J. The effect of obesity on kidney length in a health pediatric population. *Pediatr Nephrol*. 2009;24:2023-7.
62. Soheilipour F, Jesmi F, Rahimzadeh N, Pishgahroudsari M, Almassinokian F, Mazaherinezhad. Configuring a better estimation of kidney size in obese children and adolescents. *Iran J Pediatr*. 2016;26(2):e4700.



63. Wang H, Quintana FG, Cervantes FJ, Faz M. Analysis of the relationship among kidney volume, obesity, and blood pressure in Mexican-American children. *J Ped Nephrol.* 2019;7(3):1-7.
64. Dhingra B. Normal values of liver and spleen size by ultrasonography in Indian children. *Indian Pediatr.* 2010;47:475-6.
65. da Rocha SMS, Ferrer APS, de Oliveira IRS, et al. Determinação do tamanho do fígado de crianças normais, entre 0 e 7 anos, por ultrassonografia. *Radiol Bras.* 2009;42:7-13.
66. Amatya P, Shah D, Gupta N, Bhatta NK. Clinical and ultrasonographic measurement of liver size in normal children. *Indian J Pediatr.* 2014;81:441-5.
67. Cervantes FJ, Faz M, Quintana FG, Wang H. Measurement of liver size by ultrasound unveils large livers in overweight children. *Diabetes Obes Int J.* 2019;4(4):000210.
68. Mangner N, Scheuermann K, Winzer E, Wagner I, Hoellriegel R, Sandri M, et al. Childhood obesity: Impact on cardiac geometry and function. *JACC Cardiovasc Imaging.* 2014;7(12):1198-205.
69. Castro JM, García-Espinosa V, Curcio S, Arana M, Chiesa P, Giachetto G, et al. Childhood obesity associates haemodynamic and vascular changes that result in increased central aortic pressure with augmented incident and reflected wave components, without changes in peripheral amplification. *Int J Vasc Med.* 2016;2016:3129304.
70. Wójtowicz J, Lempicka A, Łuczyński W, Szczepański W, Zomerfeld A, Semeran K, et al. Central aortic pressure, arterial stiffness and echocardiographic parameters of children with overweight/obesity and arterial hypertension. *Adv Clin Exp Med.* 2017;26(9):1399-404.
71. Özkan EA, Khosroshahi HE, Kiliç M, Geçit UA, Domur E. Obesity-related cardiovascular behavior in children. *Eur Rev Pharmacol Sci.* 2016;20(8):1559-65.
72. Rauch R, Welisch E, Lansdell N, Burrill E, Jones J, Robinson T, et al. Non-invasive measurement of cardiac output in obese children and adolescents: Comparison of electrical cardiometry and transthoracic Doppler echocardiography. *J Clin Monit Comput.* 2013;27(2):187-93.
73. Schuster I, Karpoff L, Perez-Martin A, Oudot C, Startun A, Rubini M, et al. Cardiac function during exercise in obese prepubertal boys: Effect of degree of obesity. *Obesity (Silver Spring).* 2009;17(10):1878-83.
74. Giordano U, Ciampalini P, Turchetta A, Santilli IA, Calzolari F, Crinò A, et al. Cardiovascular hemodynamics: Relationships with insulin resistance in obese children. *Pediatr Cardiol.* 2003;24(6):548-52.
75. Humphries MC, Gutin B, Barbeau P, Vemulapalli S, Allison J, Owens S. Relations of adiposity and effects of training on the left ventricle in obese youths. *Med Sci Sports Exerc.* 2002;34(9):1428-35.
76. McGavock JM, Torrance B, McGuire KA, Wozny P, Lewanczuk RZ. The relationship between weight gain and blood pressure in children and adolescents. *Am J Hypertens.* 2007;20(10):1038-44.
77. Gusso S, Hofman P, Lalande S, Cutfield W, Robinson E, Baldi JC. Impaired stroke volume and aerobic capacity in female adolescents with type 1 and type 2 diabetes mellitus. *Diabetologia.* 2008;51(7):1317-20.
